# Supplementary material for: Genomic Phylogeny Using the MaxwellTM Classifier Based on Burrows–Wheeler Transform
Source: MDPI journal article supplement (doi:10.3390/computation11080158), 2023-08-11
Supplement: s1 [file s1]

**Table S1.** List of tRNA-Gly<sup>GCC</sup> from 246 species extracted from GtRNAdb (<http://lowelab.ucsc.edu/GtRNAdb/>)

**Cladorhizidae\_sp\_MBARI\_D1340-BT2\_Csp\_MBARI\_tRNA-Gly-GCC-1-5 Sponge**

GCACT**GAT**GGTTC**AGTGGTA**GAAATTCCTCGC**CTGCCA**CGCGGGAGGCCCGGG**TTCAA**TTCCCGGTCAGTGCA

**Acetobacterium\_woodii\_DSM\_1030\_Acet\_wood\_DSM\_1030\_tRNA-Gly-GCC-1-2 Eubacteriaceae**

GCGGAAG**TGG**CTC**AGTGGTA**GAGCATCGCCT**TGCCA**AGGCGAGGGtCGCGAG**TTCAA**ATCTCGTCTTCCGCTCCA

**Acidobacterium\_capsulatum\_ATCC\_51196\_Acid\_caps\_ATCC\_51196\_tRNA-Gly-GCC-1-1 Acidobacteria**

GCGGGAG**T**AGCTC**AGTGGTA**GAGCATCGCCT**TGCCA**AGGCGAGGGtCGCGGG**TTCAAG**TCCCGTCTCCCGCTCCA

**Aciduliprofundum\_boonei\_T469\_Acid\_boon\_T469\_tRNA-Gly-GCC-1-1 Euryarchaeota**

GCGGGT**TGG**TGTAGCC**TGGTA**ACACGAGGCC**CTGCCA**CGGCTTTGcCCCGGG**TTCAA**ATCCCGGCACCCGCA

**Agrobacterium\_fabrum\_str\_C58\_Agro\_fabr\_C58\_tRNA-Gly-GCC-1-1 Proteobacteria**

GCGGGT**T**AGCTC**AGGGTA**GAGCACAACT**TGCCA**AGGTTGGGGtCGAGGG**TTCAA**ATCCCTTCGCCCCGCTCCA

**Alkaliphilus\_metalliredigens\_QYMF\_Alka\_meta\_QYMF\_tRNA-Gly-GCC-1-1 Clostridiaceae bacteria**

GCGGAAG**TGG**CTC**AGTGGTA**GAGCATCGCCT**TGCCA**AGGCGAGGGtCGCGAG**TTCAA**ATCTCGTCTTCCGCTCCA

**Alligator\_mississippiensis\_Amiss4\_tRNA-Gly-GCC-4-2 Reptilia**

GCACTGG**TGG**TTC**AATGGTA**GAAATTCCTGCT**TGCCA**TGCAGGGGacCTGGG**TTCAA**TTCCCAGCCAGTGCA

**Aminobacterium\_colombiense\_DSM\_12261\_Amin\_colo\_DSM\_12261\_tRNA-Gly-GCC-1-1 Synergistota bacteria**

GCGGAAG**T**AGCTC**AGGGTA**GAGCACAACT**TGCCA**AGGTTGGGGtCGCGGG**TTCAA**ATCCCGTCTTCCGCTCCA

**Anaerobaculum\_mobile\_DSM\_13181\_Anae\_mobi\_DSM\_13181\_tRNA-Gly-GCC-1-1 Synergistota bacteria**

GCGGAAG**T**AGCTC**AGGGTA**GAGCACCACT**TGCCA**AGGTGGGGGcCGCGGG**TTCAA**ATCCCGTCTTCCGCTCCA

**Anaeromyxobacter\_dehalogenans\_2CP-1\_Anae\_deha\_2CP\_1\_tRNA-Gly-GCC-1-1 Synergistota bacteria**

GCGGGA**A**TAGCTCAG**TGGTA**GAGCATCGCCT**TGCCA**AGGCGAGGGtCGAGGG**TTCAA**ATCCCTTTTCCCGCTCCA

**Arabidopsis\_thaliana\_Ath10\_tRNA-Gly-GCC-3-1 Plant**

GCACCAG**TGG**TCT**AGTGGTA**GAAATAGTACC**CTGCCA**CGGTACAGaCCCGGG**TTCAA**TTCCCGGCTGGTGCA

**Archaeoglobus\_fulgidus\_DSM\_4304\_Arch\_fulg\_DSM\_4304\_tRNA-Gly-GCC-1-1 Euryarchaeota**

GCGCCG**ATG**GTGTAGCC**TGGTA**ACACAGGGGCTTGCCGAGCCC**CTGCC**CCGGG**TTCAA**ATCCCGGTCGGCGCA

**Ascocoryne\_sarcoides\_NRRL\_50072\_Asco\_sarc\_NRRL\_50072\_tRNA-Gly-GCC-1-1 Helotiaceae Fungus**

GCGTCGG**TGG**TTT**AGTGGTA**AAATCCATCGT**TGCCA**taagaatTTCAAttc**TTCAAG**cTCGATGGGcCCCGGGTTC

**Azospirillum\_sp\_B510\_Azos\_B510\_tRNA-Gly-GCC-2-1 Proteobacteria**

GTATTT**AGGCCA**t**TGGAA**aATAACAATGTAT**TGCCA**ATTCTGTAATCAgtAgGtCCGGGG**TTCAA**ATCCCTGTTGCCG

**Balaenoptera\_acutorostrata\_scammoni\_Bacut1\_tRNA-Gly-GCC-766-1 Mammals**

GCATTGG**TGGTTCAGTGGTAG**AGTTCTTGC**CTGCCA**TGTGGGAGGCCAGGG**TTCAA**TTCCCCGCCAATGCA

**Batrachochytrium\_dendrobatidis\_JAM81\_Batr\_dend\_JAM81\_tRNA-Gly-GCC-1-2 Fungus**

GCGCTAG**TGGTTT****AGTGGTAA**AATTCATCGT**TGCCA**TCGATGAGcCCCCGG**TTCAA**TTCCGGGCTAGCGCA

**Bipolaris\_sorokiniana\_ND90Pr\_Bipo\_soro\_ND90Pr\_tRNA-Gly-GCC-1-3 Fungus**

CATCGG**TGGTTT****AGTGGTAA**AATTAGCCGT**TGCCA**tccactctggtcc**TTCAA**aggtcccagctggacaacgTCGGCT

**Blattabacterium\_sp\_Blaberus\_giganteus\_BGIGA\_Blat\_Blaberus\_giganteus\_BGIGA\_tRNA-Gly-GCC-1-1 Bacteroidetes**

GCGAGA**AT**AGCTCAGT**TGGTAG**AGCACGACCT**TGCCA**AGGTCTGGGGcCGCGGG**TTCAA**ATCCCGTTTCTCGCT

**Blochmannia\_endosymbiont\_of\_Camponotus\_Colobopsis\_obliquus\_757\_tRNA-Gly-GCC-1-1 Gammaproteobacteria**

GCGGGA**AT**AGCTCAGT**TGGTAG**AGTACAACCT**TGCCA**AGGTTGGGGtCGCGAG**TTCAAG**TCTCGTTTCCCGCT

**Blumeria\_graminis\_f\_sp\_tritici\_96224\_Blum\_gram\_f\_tritici\_96224\_tRNA-Gly-GCC-7-1 Fungus**

GGTTGGA**TGGT**TCGG**TGGTA**cATCATcttGGCTGgT**TGCCA**agtagagtctggatagcttggacacatatccca  
ctcgAGaCAGTAGAtCGCTGG**TTCAA**ATCCAGC

**Borrelia\_chilensis\_VA1\_Borr\_chil\_VA1\_tRNA-Gly-GCC-1-1 Spirochaetaceae bacteria**

GCGAAAG**TAACTCAGGGGTAG**AGTGTACCT**TGCCA**AGGTGAAAGtCGCGGG**TTCAA**ATCCCGTCTTTCGCT

**Bos\_taurus\_Btaur9\_tRNA-Gly-GCC-3224-1 Mammals**

TCCTAGG**TGGCTCAATGGTAA**AAATACTTGC**CTGCCA**aAGCAGGAGaCTCAGG**TTCAA**TCCCTGGTCCAGGAA

**Botrytis\_cinerea\_B0510\_Botr\_cine\_B05\_10\_tRNA-Gly-GCC-1-8 Fungus**

GCGTTTG**TGGTTT****AGTGGTAA**AATCCATCGT**TGCCA**tctatctcttcttga**TTCAAG**aagagtgagaaacaac

**Branchiostoma\_floridae\_Bflor2\_tRNA-Gly-GCC-2-1 Chordata**

GCATCGG**TGGTTCAGTGGTAGA**ATTCTCGC**CTGCCA**CGCGGGAGGCCCGGG**TTCAA**TTCCCGGCCGATGCA

**Buchnera\_aphidicola\_str\_5A\_Acyrtosiphon\_pisum\_Buch\_aphi\_5A\_Acyrtosiphon\_pisum\_tRNA-Gly-GCC-1-1 Gammaproteobacteria**

GCGGGA**AT**AGCTCAGT**TGGTAG**AGCACAACT**TGCCA**AGGTTGGGGtCGCGAG**TTCAAG**TCTCGTTTCCCGCTCCA

**Caenorhabditis\_brenneri\_Cbren3\_tRNA-Gly-GCC-5-1 Nematoda**

GCATCGG**TGGTTCAGTGGTAGA**ATGCTCGC**CTGCCA**CGCGGGCTGCCCGGG**TTCAA**TTCCCGGTCGATGCA

**Caldivirga\_maquilingensis\_IC-167\_Cald\_maqu\_IC\_167\_tRNA-Gly-GCC-1-1 Thermoproteota archaea**

GCGGCCG**T**AGTCTAGTC**tGGT**ttAGGATGGCGGC**CTGCC**GCGCCGCAGAtCCCGGG**TTCAA**ATCCCGGCGGCCGCA

**Callithrix\_jacchus\_Cjacc3\_tRNA-Gly-GCC-4-1 Primates**

GCATGGG**TGG**TTC**AGTGGT**AGAATTCTCGC**CTGCCA**CGCGGGAGtCCTGGG**TTCAA**TCCCGGCCACGCA

**Calothrix\_sp\_PCC\_7507\_Calo\_PCC\_7507\_tRNA-Gly-GCC-2-1 Cyanobacteria**

GCGGATG**TGG**TGT**AAGGG**CAACACCGGAGTA**TGCCA**AGCTCCAAaTGCGAG**TTCAA**CTCTCGTCGTCCGCT

**Campylobacter\_jejuni\_subsp\_doylei\_26997\_Camp\_jeju\_doylei\_269\_97\_tRNA-Gly-GCC-2-1 Campylobacterota**

GCGGGA**AT**AGCTC**AGGGGT**AGAGCACAACT**TGCCA**AGGTTGGGGtCGCGAG**TTCAA**ATCTCGCTAACCGCACCA

**Candidatus\_Azobacteroides\_pseudotrichonymphae\_genomovar\_CFP2\_tRNA-Gly-GCC-1-1 Bacteroidetes**

GCGAAA**AT**AGCTCAGT**TGGT**AGAGTATAACCT**TGCCA**AGGTTAGGGtCGCGGG**TTCAAG**TCCCGTTTTTCGCT

**Candidatus\_Baumannia\_cicadellincola\_BGSS\_Cand\_Baum\_cicadellincola\_BGSS\_tRNA-Gly-GCC-1-1 Proteobacteria**

GCGGGA**AT**AGCTCAG**TGGT**AGAGCACAACT**TGCCA**AGGTTGGGGtCGCGAG**TTCAA**ACCTCGTTTCCCGCTCCA

**Candidatus\_Blochmannia\_chromaiodes\_str\_640\_Cand\_Bloc\_chromaiodes\_640\_tRNA-Gly-GCC-1-1 Gammaproteobacteria**

GCGGGA**AT**AGCTCAGT**TGGG**AGAGCACAACT**TGCCA**AGGTTGGGGtCGCGAG**TTCAA**ATCTCGTTTCCCGCTCCA

**Candidatus\_Caedisbacter\_acanthamoebae\_Cand\_Caed\_acanthamoebae\_tRNA-Gly-GCC-1-1 Gammaproteobacteria**

GCGGGCG**T**AGCTC**AGGGGT**AGAGCACAACT**TGCCA**AGGTTGGGGtCGAGGG**TTCAA**ATCCCTTCGCCCGCTCCA

**Candidatus\_Caldiarchaeum\_subterraneum\_Cand\_Cald\_subterraneum\_tRNA-Gly-GCC-1-1 Aigarchaeota**

GCGGCGG**T**CGTCTAGCC**TGGT**AGGACACCAGC**CTGCCA**CGCTGGGAGtCGCGGG**TTCAA**ATCCCGCCCGCCGCA

**Candidatus\_Carsonella\_ruddii\_DC\_Cand\_Cars\_ruddii\_DC\_tRNA-Gly-GCC-1-1 Gammaproteobacteria**

GCGAAAG**T**ATCTT**AATGGT**AAAGTATCACCT**TGCCA**TGGTGAAAGtTGCGAG**TTCAAG**TCTCGTCTTTCGCT

**Candidatus\_Cloacimonas\_acidaminovorans\_str\_Evry\_Cand\_Cloa\_acidaminovorans\_Evry\_tRNA-Gly-GCC-2 Cloacimonetes  
bacteria**

GCGGGA**AT**AGCTC**AGT****TGG**CAGAGCGCAACT**TGCCA**AGGTTGAAGtCGCGGG**TTCAA**ACCCCGTTTCCCGCTCCA

**Candidatus\_Endolissoclinum\_faulkneri\_L5\_Cand\_Endo\_faulkneri\_L5\_tRNA-Gly-GCC-1-1 Alphaproteobacteria**

GCGGGCG**T**AGCTC**AGTGGT**AGAGCACAACT**TGCCA**AGGTTGGGGtCGTGAG**TTCAAG**TCTCATCGTCCGCTCCA

**Candidatus\_Korarchaeum\_cryptofilum\_OPF8\_Cand\_Kora\_cryptofilum\_OPF8\_tRNA-Gly-GCC-1-1 Korarchaeota**

GCGGCCG**T**AGTCT**AGCC****TGG**AcAGGATGGGGGC**CTGCCA**CGTCCCAGACCCGGG**TTCAA**ATCCCGGCGGCCGCA

**Candidatus\_Koribacter\_versatilis\_Ellin345\_Cand\_Kori\_versatilis\_Ellin345\_tRNA-Gly-GCC-1-1 Acidobacteriota**

GCGGGAGTAACTC**AGTGGTA**GAGTGCGACCT**TGCCA**AGGTGGAAGtCGCGGG**TTCAA**ATCCCGTCTCCCGCTCCA

**Candidatus\_Methyloirabilis\_oxifera\_Cand\_Meth\_oxifera\_tRNA-Gly-GCC-1-1 Methyloirabilota bacteria**

GCGGGA**ATAGCTCAGCGGTAG**AGCATCGCCT**TGCCA**AGGCGAGGGtCGCGGG**TTCAA**ATCCCGTTTCCCGCTCCA

**Candidatus\_Nasuia\_deltoccephalinicola\_str\_NAS-ALF\_tRNA-Gly-GCC-1-1 Betaproteobacteria**

GGGTAGCT**TTAATGGTA**AAGCGTAACTT**TGCCA**AAGTTGAGAtTGCGAG**TTCAA**ATCTCGTCCCTT

**Candidatus\_Sulcia\_muelleri\_CARI\_Cand\_Sulc\_muelleri\_CARI\_tRNA-Gly-GCC-1-1 Bacteroidota**

GCGAGA**ATAGCTCATTGGTAG**AGTACTACCT**TGCCA**AGGTAG**TGGTA**GCGGG**TTCAA**ATCCCGTTTCTCGCT

**Candidatus\_Zinderia\_insecticola\_CARI\_Cand\_Zind\_insecticola\_CARI\_tRNA-Gly-GCC-1-1 Betaproteobacteria**

GCGAAAG**TAGCTCAATTGGTAG**AGCAATACCT**TGCCA**AGGTATAGGtTGAGAG**TTCAA**AACTCTTCTTTCGCT

**Cavia\_porcellus\_Cporc3\_tRNA-Gly-GCC-204-1 Mammals**

GcGTATC**TCAGTGGTA**GAATACTTGC**CTGCCA**TGCACAAAGcTCTGGG**TTCAA**TTCCCTAGCATtgCA

**Ceratodon\_purpureus\_GG1\_Cpurp\_GG1\_1\_tRNA-Gly-GCC-9-1 Bryophyta**

GGGttt**TATGTCTAGTGGTA**GAATAGTACC**CTGCCA**CGGTACAGaCCCGGG**TTCAA**TTCCCGGCCGGTGCA

**Ceratodon\_purpureus\_R40\_Cpurp\_R40\_1\_tRNA-Gly-GCC-3-1 Bryophyta**

GCGGAAA**TAGCTTAATGGTAG**AGTATAGCCT**TGCCA**AGGCTGAGGtTGAGGG**TTCAA**GTCCCTTTTCCGCT

**Chara\_braunii\_S276\_Cbrau1\_tRNA-Gly-GCC-11-1 Viridiplantae**

GTGGAA**ATAGCTTAATGGTAG**AGTATAGCCT**TGCCA**AGGCTAAGGtTGAGGG**TTCAA**ATCCCTTTTCCGCT

**Chlamydia\_muridarum\_MopnTet14\_Chla\_muri\_MopnTet14\_tRNA-Gly-GCC-1-1 Chlamydiota bacteria**

GCGGGTG**TAGCTCAGTGGTAG**AGCGCCACGT**TGCCA**ACGTGAAGGtCGTGAG**TTCAAG**CCTCATCACCCGCT

**Chlamydophila\_abortus\_AB7\_Chla\_abor\_AB7\_tRNA-Gly-GCC-1-1 Chlamydiota bacteria**

GCGGGTG**TAGCTCAGTGGTAG**AGCGCCACGT**TGCCA**ACGTGAAGGtCGTGAG**TTCAAG**CCTCATCACCCGCT

**Choloepus\_hoffmanni\_Choff2\_tRNA-Gly-GCC-2-1 Mammals**

GCATTGG**TGGTTCAGTGGTA**GAATTCTCGC**CTGCCA**CGCGGGAGGCCCGGG**TTCAA**TTCCCGGCCAATGCA

**Chrysemys\_picta\_bellii\_Cpict2\_tRNA-Gly-GCC-24-1 Reptilia turtle**

GCATTGG**TGGTTCAGTGGTA**GAATCTCCCC**CTGCCA**CGTGGGAGGCCTAGAT**TTCAA**TTCCCAACCAGTATA

**Cladorhizidae\_sp\_MBARI\_D1340-BT2\_Csp\_MBARI\_tRNA-Gly-GCC-1-1 Demospongiae**

GCACTGA**ATGG**TTC**AGTGGTA**GAAATTCTCGC**CTGCCA**CGCGGGAGGCCCGGG**TTCAA**TTCCCGGTCAGTGCA

**Closterium\_sp\_NIES-67\_Clost1\_tRNA-Gly-GCC-5-1 Charophyta**

GTGCGCTGT**TTT****AGTGGTA**GAAATAGCAC**CTGCCA**tgtgccCGGTGCAGaCCTGGG**TTCAA**TTCCCGGCTGGCACA

**Clostridium\_kluyveri\_DSM\_555\_Clos\_kluy\_DSM\_555\_tRNA-Gly-GCC-2-1 Eubacteriales**

GCGGGAG**TGG**CTC**AGTGGTA**GAGCGTCACCT**TGCCA**AGGTGAACGtCGCGGG**TTCAA**ATCCCGTCTTCCGCTCCA

**Coralloccoccus\_coralloides\_DSM\_2259\_Cora\_cora\_DSM\_2259\_tRNA-Gly-GCC-1-2 Myxococcales bacteria**

GCGGGA**AT**AGCTC**AGC****GGT**AGAGCATCGCCT**TGCCA**AGGCGAGGGtCGAGGG**TTCAA**ATCCCTTTTCCCGCTCCA

**Cricetulus\_griseus\_Cgris1\_tRNA-Gly-GCC-301-1 Mammals (halmster)**

TCTTG**GT****TGC**AGCTC**AGTGGTA**AAGCATTTAG**CTGCCA**TTTGCAAGGcTTTGGA**TTCAA**TCCCCAgGACTAAGAA

**Curvularia\_lunata\_CX-3\_Curv\_luna\_CX\_3\_tRNA-Gly-GCC-1-5 Fungus**

GCATCGG**TGG**TTT**AGTGGTA**AAATTAGCCGT**TGCCA**ATTCATCTG**TTCAA**TTGATTCACTTCACAGAACAGCATGAG

**Cylindrospermum\_stagnale\_PCC\_7417\_Cyli\_stag\_PCC\_7417\_tRNA-Gly-GCC-2-1 Cyanobacteria**

GGAAGTGG**T**AGCTCA**ACTGGA**AGAGCGCTCGACA**GCCA**ATCGGGAGGtTGTGAG**TTCAAG**TCTCACCCCTTCCA

**Dactylellina\_haptotyla\_CBS\_20050\_Dact\_hapt\_CBS\_200\_50\_tRNA-Gly-GCC-2-1 Fungus**

GCGTTT**TG****TGG**TTT**AGTGGTA**AAATTTCGTCGT**TGCCA**TTCAAtaatgataTCGACGAGcCCCGGG**TTCAA**TTCCCGG

**Danio\_rerio\_Dreri11\_tRNA-Gly-GCC-15-1 Fish**

GCATTGG**TGG**TTC**AGTGGTA**GAAATTCTCGC**CTGCCA**CGCGGGAGaCCCGGG**TTCAA**TTCCCGGCTAATGCA

**Dasypus\_novemcinctus\_Dnove3\_tRNA-Gly-GCC-10902-1 Mammals (armadillo)**

GCaTGGG**TGG**TTC**AGTGGTA**GAAATTCTCAC**CTGCCA**CACAGGAGGCCAGG**TTCAAG**TCCCAGCCAAGCAC

**Desulfarculus\_baarsii\_DSM\_2075\_Desu\_baar\_DSM\_2075\_tRNA-Gly-GCC-1-1 Thermodesulfobacteriota**

GCGGGAG**T**AACTCAGAGGTAGAGTGCAACCT**TGCCA**AGGTTGAAGtCGCGGG**TTCAA**CTCCCGTCTCCCGCTCCA

**Desulfatibacillum\_alkenivorans\_AK-01\_Desu\_alke\_AK\_01\_tRNA-Gly-GCC-1-1 Desulfatibacillum**

GCGGGA**AT**AACTC**AGTGGTA**GAGTGCGACCT**TGCCA**AGGTGGAAGtCGCGGG**TTCAA**ATCCCGTTTCCCGCTCCA

**Desulfobacterium\_autotrophicum\_HRM2\_Desu\_auto\_HRM2\_tRNA-Gly-GCC-1-2 Thermodesulfobacteriota**

GCGGGA**AT**AACTC**AGTGGTA**GAGTGCGACCT**TGCCA**AGGTGGAAGtCGCGGG**TTCAA**ATCCCGTTTCCCGCTCCA

**Desulfobacula\_toluolica\_Tol2\_Desu\_tolu\_Tol2\_tRNA-Gly-GCC-1-2 Thermodesulfobacteriota**

GCGGGA**ATA**ACTC**AGTGGTA**GAGTGCGACCT**TGCCA**AGGTCTGAAGtCGCGGG**TTCAA**ATCCCGTTTCCCGCTCCA

**Desulfococcus\_oleovorans\_Hxd3\_Desu\_oleo\_Hxd3\_tRNA-Gly-GCC-1-1 Thermodesulfobacteriota**

GCGGGA**ATA**ACTC**AGTGGTA**GAGTGCGACCT**TGCCA**AGGTCTGAAGtCGCGGG**TTCAA**ATCCCGTTTCCCGCTCCA

**Desulfohalobium\_retbaense\_DSM\_5692\_Desu\_retb\_DSM\_5692\_tRNA-Gly-GCC-1-1 Thermodesulfobacteriota**

GCGGGAG**TAA**CTCAG**TGGTA**GAGTGCAACCT**TGCCA**AGGTTGAAGtCGCGGG**TTCAA**ATCCCGTCTCCCGCTCCA

**Desulfomicrobium\_baculatum\_DSM\_4028\_Desu\_bacu\_DSM\_4028\_tRNA-Gly-GCC-1-4 Desulfomicrobiaceae bacteria**

GCGGGAG**TAA**CTCAG**TGGTA**GAGTGCAACCT**TGCCA**AGGTTGAAGtCGCGAG**TTCAA**ATCTCGTTTCCCGCTCCA

**Desulfomonile\_tiedjei\_DSM\_6799\_Desu\_tied\_DSM\_6799\_tRNA-Gly-GCC-1-1 Desulfomonilaceae bacteria**

GCGGGA**ATA**ACTCAG**TGGTA**GAGTGCAACCT**TGCCA**AGGTTGAAGtCGCGGG**TTCAA**ATCCCGTTTCCCGCTCCA

**Desulfovibrio\_africanus\_str\_Walvis\_Bay\_Desu\_afri\_Walvis\_Bay\_tRNA-Gly-GCC-1-1 Thermodesulfobacteriota**

GCGGGA**ATA**ACTC**AGTGGTA**GAGTGCAACCT**TGCCA**AGGTTGAAGtCGCGGG**TTCAA**ATCCCGTTTCCCGCTCCA

**Desulfurella\_acetivorans\_A63\_Desu\_acet\_A63\_tRNA-Gly-GCC-1-1 Campylobacteriota**

GCGGGA**ATA**AGCTCAGT**TGGTA**GAGCACAACT**TGCCA**AGGTTGGGGtCGCGGG**TTCAAG**TCCCGTTTCCCGCTCCA

**Desulfurobacterium\_thermolithotrophum\_DSM\_11699\_Desu\_ther\_DSM\_11699\_tRNA-Gly-GCC-2-1 Desulfurobacteriales**

GCGGGCG**T**AGCTCAGT**TGGTA**GAGCGAACT**TGCCA**AGGTTTAGGtCGCGGG**TTCAAG**TCCCGTCGCCGCTCCA

**Dictyoglomus\_thermophilum\_H-6-12\_ATCC\_35947\_Dict\_ther\_H\_6\_12\_ATCC\_35947\_tRNA-Gly-GCC-1-1 Dictyoglomota bacteria**

GCGGGAG**T**AGCTC**AGGGTA**GAGCGTCTCCT**TGCCA**AGGAGAAGGcCGCGGG**TTCAA**ATCCCGTCTCCCGCTCCA

**Dipodomys\_ordii\_Dordi2\_tRNA-Gly-GCC-1-1 Mammals (rat)**

GCATGGG**TGG**TTC**AGTGGTA**GAATTTTGC**CTGCCA**CACAGGAGGCCTGGG**TTCAA**TTTCCAGCCCATGAA

**Dokdonia\_sp\_4H-3-7-5\_Dokd\_4H\_3\_7\_5\_tRNA-Gly-GCC-1-1 Bacteroidota**

GCGAAAG**T**AGCTCAGGGGTAGAGCATCACCT**TGCCA**AGGTGGGGGtCGCGAG**TTCAA**ATCTCGTCTTTCGCT

**Drechslerella\_stenobrocha\_248\_Drec\_sten\_248\_tRNA-Gly-GCC-1-1 Fungus**

GCGTTTG**TGG**TTTAG**TGGTA**AAATTCATCGT**TGCCA**t**CTGCC**tccgcaggtcaagTTCGATGAGcCCCCGG**TTCA**  
**A**TTCCCCGGCAGACGCA

**Echinops\_telfairi\_Etelf2\_tRNA-Gly-GCC-394-1 Plant Asteraceae**

CCCTGG**T**AGCACAG**TGGTA**ACAGCATTTGG**CTGCCA**TCCagAAAAGtCAGTGG**TTCAA**ACCCACCagcctcTCAGTGGA

**Erinaceus\_europaeus\_Eeuro2\_tRNA-Gly-GCC-3-1 Mammals (hedgehog)**

ACATGGG**TGG**ATCAG**TGGTA**GAATTCTTTC**CTGCCA**TGCGGGAGGCCAGG**TTCAA**TTCCCGGCTCATGCA

**Erysipelothrix\_rhusiopathiae\_SY1027\_Erys\_rhus\_SY1027\_tRNA-Gly-GCC-1-1 Bacillota**

GCAGGTG**T**AGTTC**AATGGTA**GAACACGACCT**TGCCA**AGGTTGAGGCGGGGG**TTCAA**TTCCCTCACCTGCTCCA

**Eubacterium\_acidaminophilum\_DSM\_3953\_Euba\_acid\_DSM\_3953\_tRNA-Gly-GCC-1-1 Bacillota**

GCGGAAG**TGG**CTCAG**TGGTA**GAGCATCGCCT**TGCCA**AGGCGAGGGtCGCGGG**TTCAA**ATCCCGTCTTCCGCTCCA

**Exophiala\_mesophila\_CBS\_40295\_Exop\_meso\_CBS\_40295\_tRNA-Gly-GCC-1-1 Fungus**

GCATTGT**TGG**TTTAG**TGGTA**AAAT**CTGCC**GT**TGCCA**gtcttccttaacaggtctact**TTCAA**tgTCGGCAGGcCC  
CGTGTTTCGATTACGGACAATGCA

**Faecalitalea\_cylindroides\_T2-87\_Faec\_cyli\_T2\_87\_tRNA-Gly-GCC-1-1 Firmicutes bacteria**

GCAGATG**T**AGTTC**AATGGTA**GAACACAGCCT**TGCCA**AGGCTGATaCGGGGG**TTCAA**TTCCCTCATCTGCTCCA

**Fervidicoccus\_fontis\_Kam940\_Ferv\_font\_Kam940\_tRNA-Gly-GCC-1-1 Proteoarchaeota**

GCGGCGG**T**CGTCTAGCC**TGG**AtcAGGACGCCGGC**CTGCCA**CGTCGGAAAtCCCGGG**TTCAA**ATCCCGGCCGCCGCA

**Fistulina\_hepatica\_ATCC\_64428\_Fist\_hepa\_ATCC\_64428\_tRNA-Gly-GCC-2-1 Fungus**

GCATTAA**ATG**GGGTAG**TGGTA**ACCTGGGTCTG**TGCCA**tagggattgagcaccacttgTCGACCCGcCGGGGG**TTCAA**  
**AA**TTCCCCCTTAATGCA

**Formosa\_agariphila\_KMM\_3901\_Form\_agar\_KMM\_3901\_tRNA-Gly-GCC-1-1 Bacteroidota**

GCGAAAG**T**AGCTC**AGGGTA**GAGCATCACCT**TGCCA**AGGTGAGGGtCGCGGG**TTCAA**ATCCCGTCTTTTCGCT

**Geobacillus\_sp\_Y41MC1\_Geob\_Y4\_1MC1\_tRNA-Gly-GCC-3-1 Bacillota**

GCGGAAG**T**AGTTC**AGTGGTA**GAACACCACCT**TGCCA**AGGTGGGGGtCGCGGG**TTCAAG**TCCCGTCTTCCGCT

**Geospiza\_fortis\_Gfort1\_tRNA-Gly-GCC-1-1 Aves**

GCATTGG**TGG**TTC**AGTGGTA**GAATTCTCGC**CTGCCA**CGCAGGAGGCCAGGG**TTCAA**TTCTTGACCAAAGCA

**Glycine\_max\_Williams\_82\_Gmax2.1\_tRNA-Gly-GCC-1-1 Plant (soybean)**

GTTGTTG**T**AGT**ATAGT**GATaAGTATTTTCCC**CTGCCA**CGGGAACGaTCCGGA**TTCAA**TCCCCGGCAACGgggggtttcACT

**Gossypium\_raimondii\_Graim2\_tRNA-Gly-GCC-5-1 Plant (cotton)**

GCGGAA**AT**AGCTTA**ATGGTA**GAGCATAGCCT**TGCCA**AGGCTGAGGtTGAGGG**TTCAAG**TCCCTCCTTCCGCT

**Halalkalicoccus\_jeotgali\_B3\_Hala\_jeot\_B3\_tRNA-Gly-GCC-1-1 Halobacteriaceae archaea**

GCGCTGG**T**AGTGT**AGTGGTA**TCACGTGACCT**TGCCA**TGGTCACAaCCTGGG**TTCAA**ATCCCAGCCAGCGCA

**Halanaerobium\_hydrogeniformans\_Hala\_hydr\_tRNA-Gly-GCC-1-2 Halanaerobiaceae bacteria**

GCGGGAGTAGCTC**AGTGGTA**GAGCATCACGT**TGCCA**ACGTGAGGGtCGCGAG**TTCAA**ATCTCGTTTCCCGCTCCA

**Haloarcula\_hispanica\_ATCC\_33960\_CGMCC\_12049\_tRNA-Gly-GCC-1-1 Halobacteriales archaea**

GCGCTGGTAGTGTAGT**TGGTA**TCACGTGACCT**TGCCA**TGGTCACAaCCTGGG**TTCAA**ATCCCAGCCAGCGCA

**Halobacterium\_salinarum\_R1\_DSM\_671\_Halo\_sali\_R1\_DSM\_671\_tRNA-Gly-GCC-1-1 Halobacteriales archaea**

GCGCTGGTAGTGT**AGTGGTA**TCACGTGACCT**TGCCA**TGGTCACAaCCTGGG**TTCAA**ATCCCAGCCAGCGCA

**Halodesulfovibrio\_sp\_MK-HDV\_Halo\_MK\_HDV\_tRNA-Gly-GCC-1-1 Proteobacteria**

GCGGGA**ATA**ACTC**AGTGGTA**GAGTACAACCT**TGCCA**AGGTTGGAGtCGCGAG**TTCAA**ATCTCGTTTCCCGCTCCA

**Haloferax\_mediterranei\_ATCC\_33500\_CGMCC\_12087\_Halo\_medi\_ATCC\_33500\_CGMCC\_1\_2087\_tRNA-Gly-GCC-2-1 Euryarchaeota**

GCGCTGGTAGTGT**AGTGGTA**TCACGTGACCT**TGCCA**TGGTCACAaCCTGGG**TTCAA**ATCCCAGCCAGCGCA

**Halogeometricum\_borinquense\_DSM\_11551\_PR\_3\_Halo\_bori\_DSM\_11551\_PR\_3\_tRNA-Gly-GCC-1-2 Euryarchaeota**

GCGCTGGTAGTGT**AGTGGTA**TCACGTGACCT**TGCCA**TGGTCACAaCCTGGG**TTCAA**ATCCCAGCCAGCGCA

**Halomicrobium\_mukohataei\_DSM\_12286\_Halo\_muko\_DSM\_12286\_tRNA-Gly-GCC-1-1 Halomicrobium**

GCGGTGGTAGTGT**AGTGGTA**TCACAGGACC**CTGCCA**CGGTCTTAaCGGGGG**TTCAA**ATCCCCCCCACCGCA

**Halomonas\_sp\_KO116\_Halo\_KO116\_tRNA-Gly-GCC-2-1 Proteobacteria**

GCGGGA**ATA**CTC**AGTGGTA**GAGCATCGCCT**TGCCA**AGGCGAGGGtCGGGAG**TTCAA**ATCTCCTTTCCCGCTCCA

**Haloquadratum\_walsbyi\_C23\_Halo\_wals\_C23\_tRNA-Gly-GCC-1-1 Euryarchaeota**

GCGCTGGTAGTGT**AGTGGTA**TCACGTGACCT**TGCCA**TGGTCACAaCCCGGG**TTCAA**ATCCCGGCCAGCGCA

**Halorhabdus\_tiamatea\_SARL4B\_Halo\_tiam\_SARL4B\_tRNA-Gly-GCC-1-1 Euryarchaeota**

GCGACGG**TGGTGT****AGTGGTA**TCACAGGACC**CTGCCA**CGGTCTTAaCCCGAG**TTCAA**ATCTCGGCCGTGCA

**Halorubrum\_lacusprofundi\_ATCC\_49239\_Halo\_lacu\_ATCC\_49239\_tRNA-Gly-GCC-1-2 Euryarchaeota**

GCACCGGTAGTGT**AGTGGTA**TCACGCAACCT**TGCCA**TGGTTGCAaCCCGAG**TTCAA**ATCTCGGCCGGTGCA

**Halostagnicola\_larsenii\_XH-48\_Halo\_lars\_XH\_48\_tRNA-Gly-GCC-1-1 Euryarchaeota**

GCGTTGGTAGTGT**AGTGGTA**TCACGTGACCT**TGCCA**TGGTCACAaCCTGGG**TTCAA**ATCCCAGCCAACGCA

**Haloterrigena\_turkmenica\_DSM\_5511\_Halo\_turk\_DSM\_5511\_tRNA-Gly-GCC-1-2 Euryarchaeota**

GCGCTGGTAGTGT**AGTGGTA**TCACGTGACCT**TGCCA**TGGTCACAaCCGGGG**TTCAA**ATCCCCGCCAGCGCA



**Halovivax\_ruber\_XH-70\_Halo\_rube\_XH\_70\_tRNA-Gly-GCC-1-1 Euryarchaeota**

GCGCTGGTAGTGTAG**TGGTA**TCACGTGACCT**TGCCA**TGGTCACAaCCTGGG**TTCAA**ATCCCAGCCAGCGCA

**Heterocephalus\_glaber\_Hglab2\_tRNA-Gly-GCC-3-1 Mammals (rat)**

GCATTGG**TGGTTCAGTGGTA**GAAATTCTCGC**CTGCCA**CGAGGGAGGCCCGGG**TTCAA**TTCCCAGCCAATGCA

**Hyperthermus\_butyliscus\_DSM\_5456\_Hype\_butyl\_DSM\_5456\_tRNA-Gly-GCC-1-1 Crenarchaeota**

GCGGCGG**TCGTCTAGCCTGG**ActAGGACGCCGGC**CTGCCA**AGCCGGCGAtCCCGGG**TTCAA**ATCCCGGCCGCCGCACCA

**Ignicoccus\_hospitalis\_KIN4I\_Igni\_hosp\_KIN4\_I\_tRNA-Gly-GCC-1-1 Crenarchaeota**

GCGGCGG**TCGTCTAGCCTGG**ActAGGACGCCGGC**CTGCCA**CGCCGGAGAtCCCGGG**TTCAA**ATCCCGGCCGCCGCACCA

**Ignisphaera\_aggregans\_DSM\_17230\_Igni\_aggr\_DSM\_17230\_tRNA-Gly-GCC-1-1 Crenarchaeota**

GCGGCGG**TCGTCTAGCCTGGT**ctAGGACGCCGGC**CTGCCA**AGCCGGAGAtCCCGGG**TTCAA**ATCCCGGCCGCCGCACCA

**Isosphaera\_pallida\_ATCC\_43644\_Isos\_pall\_ATCC\_43644\_tRNA-Gly-GCC-1-1 Planctomycetota bacteria**

GCGGGAGTAGCTC**AGGGGTAG**AGCGCCACGT**TGCCA**ACGTGGTTGtCGTGGG**TTCAA**ATCCCATCTCCCGCT

**Laccaria\_bicolor\_S238N-H82\_Lacc\_bico\_S238N\_H82\_tRNA-Gly-GCC-4-1 Fungus**

GCATTAA**ATGGGGTAGTGGTA**ACCTGGGTCA**TGCCA**tgaggatttcataatctgtttgtgtttacctataTTGACC  
TGcTGGGGG**TTCAA**ATCCCTCTTAATGCA

**Lacinutrix\_sp\_5H-3-7-4\_Laci\_5H\_3\_7\_4\_tRNA-Gly-GCC-1-1 Flavobacteriaceae**

GCGAAAGTAGCTC**AGGGGTAG**AGCATCACCT**TGCCA**AGGTGGAGGtCGTGGG**TTCAA**ATCCCATCTTTCGCT

**Lactobacillus\_helveticus\_DPC\_4571\_Lact\_helv\_DPC\_4571\_tRNA-Gly-GCC-3-1 Firmicutes bacteria**

GCGGAAGTAGTTC**AGTGGTAGA**ACATCACCT**TGCCA**TGGTGGGGGtCGCGGG**TTCAA**ATCCCGTCTTCCGCT

**Latimeria\_chalumnae (coelacanth)\_Lchal1\_tRNA-Gly-GCC-3-1 Fish**

GCATTGG**TGGTTCAGTGGTA**GAAATTCTCGC**CTGCCA**CGCGGGAGaCCCGGG**TTCAA**TTCCCGGCCAATGCA

**Lawsonia\_intracellularis\_N343\_Laws\_intr\_N343\_tRNA-Gly-GCC-1-1 Plant (magnoliophyta)**

GCGGGAGTAACTC**AGTGGTAG**AGTGCAACCT**TGCCA**AGGTTGAAGtCGCGGG**TTCAA**ATCCCGTCTCCCGCTCCA

**Leptospira\_biflexa\_serovar\_Patoc\_strain\_Patoc\_1\_Ames\_tRNA-Gly-GCC-1-1 Spirochaetae bacteria**

GCGGGA**ATAGCTCAGCGGTAG**AGCATCTCCT**TGCCA**AGGAGAGGGtCGCGGG**TTCAA**GTCCCGTTTCCCGCT

**Loxodonta\_africana\_Lafri3\_tRNA-Gly-GCC-6-1 Mammals (elephant)**

GCGTTGG**TGGTCCAGTGGTA**GAAATTCTTG**CTGCCA**TGCAGGAGGCCAGG**TTCAA**TTCTTGCCAATGCA

**Macaca\_mulatta\_Mmula8\_tRNA-Gly-GCC-11-1 Mammals (primates)**

GCATGGG**TGG**TT**CAGTGGTA**GAATTCTTGC**CTGCCA**CGCGGGAGGCCCGGG**TTCAA**TTCTGGCCCATACA

**Macropus\_eugenii\_Meuge2\_tRNA-Gly-GCC-9-1 Macropodinae (kangaroo)**

GGTTaccgc**ATG**GATGGTT**CAGTGGTA**GAATCCTTCC**CTGCCA**CGCGGGAGGTCCAGG**TTCAA**TTCTGGCTCGACCA

**Medicago\_truncatula\_A17\_Mtrun4\_tRNA-Gly-GCC-2-1 Plant (tracheophytes)**

GCACCAG**TGG**TCT**AGTGGTA**GAATAGTACC**CTGCCA**TGGTACAGaCCCGGG**TTCAA**TTCTGGCTGGTGCA

**Melopsittacus\_undulatus\_Mundu1\_tRNA-Gly-GCC-2-2 Aves (parakeet)**

GCATTGG**TGG**TT**AGTGGTA**GAATTCTCGC**CTGCCA**CGCGGGAGGCCCGGG**TTCAA**TTCCCGGCCAATGCA

**Metallosphaera\_sedula\_CuR1\_Meta\_sedu\_CuR1\_tRNA-Gly-GCC-1-1 Thermoproteota (archaea)**

GCGGCCG**T**AGTCTAGCC**TGG**AttAGGACGC**CTGCC**TGCCACGCAGGAGGtCCCGGG**TTCAA**ATCCCGGCGGTTCGCA

**Methanobacterium\_formicum\_BRM9\_Meth\_form\_BRM9\_tRNA-Gly-GCC-1-1 Euryarchaeota**

GCGGCGT**T**AGTCCAGCC**TGGT**TAAGACACTGGC**CTGCCA**CGCCAGCGACCCGGG**TTCAA**ATCCCGGACGCCGCA

**Methanobrevibacter\_ruminantium\_M1\_Meth\_rumi\_M1\_tRNA-Gly-GCC-1-1 Euryarchaeota**

GCGGTGT**T**AGTCCAGCC**TGGT**tAAGACTCTAGC**CTGCCA**CGTTAGAGACCCGGG**TTCAA**ATCCCGGACGCCGCA

**Methanocaldococcus\_fervens\_AG86\_Meth\_ferv\_AG86\_tRNA-Gly-GCC-1-1 Euryarchaeota**

GCGGCCT**TGG**TGTAGCC**TGGTA**ACACACGGGC**CTGCCA**CGCCCGGAcCCCGGG**TTCAA**ATCCCGGAGGCCGCACCA

**Methanocella\_arvoryzae\_MRE50\_Meth\_arvo\_MRE50\_tRNA-Gly-GCC-1-1 Methanocellales archaea**

GCGCCGG**T**AGTGTAGTGGTtATCACTGTAGCT**TGCCA**AGCTATAGACTCGGG**TTCAA**TTCCCGACCGGCGCACCA

**Methanococcus\_maripaludis\_C5\_Meth\_mari\_C5\_tRNA-Gly-GCC-1-1 Methanococcaceae archaea**

GCGGCTT**TG**ATGTAG**ACTGGTA**TCATACGGCC**CTGCCA**CGGCCGACACCCGGG**TTCAA**ATCCCGGAGGCCGCA

**Methanococcus\_voltae\_A3\_Meth\_volt\_A3\_tRNA-Gly-GCC-1-1 Methanococcaceae archaea**

GCGGCCT**TG**ATGT**AGTGGTA**TCATACGGCC**CTGCCA**CGGCCGATACCCGGG**TTCAA**ATCCCGGAGGCCGCA

**Methanopyrus\_kandleri\_AV19\_Meth\_kand\_AV19\_tRNA-Gly-GCC-1-1 Euryarchaeota**

GCGGCCG**CAGTCTAGTC****TGGTA**AGGACGCGGGC**CTGCC**GAGCCCGTGGCCCGGG**TTCAA**ATCCCGGCGGCCGCACCA

**Methanosarcina\_lacustris\_Z-7289\_Meth\_lacu\_Z\_7289\_tRNA-Gly-GCC-1-1 Methanosarcinales archaea**

ACATCAG**T**AGTGT**AGCGGT**cATCACCGGGCGT**TGCCA**ACGCTCGAaCTCGGG**TTCAA**ATCCCGACTGGTGTA

**Methanospaera\_stadtmanae\_DSM\_3091\_Meth\_stad\_DSM\_3091\_tRNA-Gly-GCC-1-1 Methanobacteriaceae archaea**

GCAGCG**AT**AGTCCAGGC**TGGC**tAAGACTCTACC**CTGCCA**CGGTAGTGACCCGGG**TTCAA**ATCCCGGTCGTTGCA

**Methanothermobacter\_sp\_CaT2\_Meth\_CaT2\_tRNA-Gly-GCC-1-1 Methanobacteriaceae archaea**

GCGGCGT**T**AGTCCAGCC**TGGT**TAAGACACTGGC**CTGCCA**CGCCAGCGACCCGGG**TTCAA**ATCCCGGACGCCGCA

**Methanothermococcus\_okinawensis\_IH1\_Meth\_okin\_IH1\_tRNA-Gly-GCC-1-1 Methanocaldococcaceae archaea**

GCGGCCT**TG**ATGTAGCC**TGGTAT**CATACGGCC**CTGCCA**CGGCCGATACCCGGG**TTCAA**ATCCCGGAGGCCGCA

**Methanothermus\_fervidus\_DSM\_2088\_Meth\_ferv\_DSM\_2088\_tRNA-Gly-GCC-1-1 Methanothermaceae archaea**

GCGGCGT**T**AGTCCAGCC**TGGT**tAAGACGCTGGC**CTGCCA**CGCCAGTGACCCGGG**TTCAA**ATCCCGGACGCCGCA

**Methanotorris\_igneus\_Kol\_5\_Meth\_igne\_Kol\_5\_tRNA-Gly-GCC-1-1 Methanocaldococcaceae (archae**

GCGGCCT**TG**ATGTAGCC**TGGTAA**CATACGGGC**CTGCCA**CGCCCGTTtCCCGGG**TTCAA**ATCCCGGAGGCCGCACCA

**Methylococcoides\_ferrireducens\_V4\_Meth\_infe\_V4\_tRNA-Gly-GCC-1-1 Methylococcoidales archaea**

GCGGGTG**T**AGCTCAGT**TGGT**AGAGCGCAACCT**TGCCA**AGGTTGACGtCGCGGG**TTCAA**ATCCCGTCACCCGCT

**Microcoleus\_sp\_PCC\_7113\_Micr\_PCC\_7113\_tRNA-Gly-GCC-2-1 Cyanobacteria**

GCGGGTG**TG**ATGT**AGTGG**CtAGCATCTGAGT**CTGCCA**AGTCTCAGCgCATGGG**TTCAAG**TCCCATCATCCGCT

**Monodelphis\_domestica\_Mdome5.1\_tRNA-Gly-GCC-3-1 Mammals (dolphin)**

GCATTGG**TGG**TTC**AGTGGT**AGAATTCTCGC**CTGCCA**CGCGGGGGCCTGGG**TTCAA**TTCCCGGCCAATGCA

**Moorella\_thermoacetica\_ATCC\_39073\_Moor\_ther\_ATCC\_39073\_tRNA-Gly-GCC-1-1 Bacillota**

GCGGAAG**TAG**CTC**AGTGGT**AGAGCATCGCCT**TGCCA**AGGCGAGGGcCGCGGG**TTCAA**ATCCCGTCTTCCGCTCCA

**Mrakia\_frigida\_Nwmf-AP1\_Mrak\_frig\_Nwmf-AP1\_tRNA-Gly-GCC-1-1 Fungus**

ATAGGTA**TGG**TGA**AGTGG**CtATCATTCGCGCT**TGCCA**TGCGTGAGGCAGGGG**TTCAA**TTCCCCTTACCTATA

**Mus\_caroli\_CAROLIEiJ\_MusCAROLI\_EiJ\_1509\_tRNA-Gly-GCC-34-1 Mammals (mouse)**

GCATAAG**TGG**TTC**AGTGGT**AGAATTCTCAC**CTGCCA**TTTGGGAGGCCAGG**TTCAA**TTCCAGGCCCATtGCA

**Mus\_musculus\_AJ\_MusA\_J\_1509\_tRNA-Gly-GCC-2-1 Mammals (mouse)**

GCATGGG**TGG**TTC**AGTGGT**AGAATTCTCAC**CTGCCA**TGAGGGAGGCCAGG**TTCAA**TTCCAGGCCCATtGCA

**Mus\_pahari\_PAHARIEiJ\_MusPAHARI\_EiJ\_1509\_tRNA-Gly-GCC-392-1 Mammals (mouse)**

GAGATGGC**TCAGTGGT**taAGGATACTGA**CTGCCA**TTCCAGATGaCCTGGG**TTCAA**TTCCTAGCAACTGCA

**Mus\_spretus\_SPRETEIJ\_MusSPRET\_EiJ\_1509\_tRNA-Gly-GCC-4-1 Mammals (mouse)**

GCATGGG**TGGTTCAGTGGTA**GAAATTCTCAC**CTGCCA**TGAGGGAGGCCAGG**TTCAA**TTCCAGGCCCATtGCA

**Mycoplasma\_agalactiae\_5632\_Myco\_agal\_5632\_tRNA-Gly-GCC-1-1 Tenericutes bacteria**

GCAAATG**T**AGTTC**AATGGTA**GAACACCAGCT**TGCCA**TGCTGGATaCGGGGG**TTCAA**TTCCCCTCATTTGCTCCA

**Myxococcus\_stipitatus\_DSM\_14675\_Myxo\_stip\_DSM\_14675\_tRNA-Gly-GCC-1-1 Deltaproteobacteria**

GCGGGA**AT**AGCTC**AGCGGTAG**AGCATCGCCT**TGCCA**AGGCGAGGGtCGAGGG**TTCAA**ATCCCTTTTCCCGCTCCA

**Naegleria\_gruberi\_NEG-M\_Naeg\_grub\_NEG\_M\_tRNA-Gly-GCC-1-6 Eukaryota (amoeba)**

GCGTCG**ATGGTTT****AGTGGTA**GAAATACGGCGT**TGCCA**TCGCCGTGaCCCGGG**TTCAA**TTCCCGGTCGACGCA

**Natrialba\_magadii\_ATCC\_43099\_Natr\_maga\_ATCC\_43099\_tRNA-Gly-GCC-1-1 Halobacteriaceae archaea**

GCGCTGG**T**AGTGT**AGTGGTA**TCACGTGACCT**TGCCA**TGGTCACAaCCTGGG**TTCAA**ATCCCAGCCAGCGCA

**Natrinema\_pellirubrum\_DSM\_15624\_Natr\_pell\_DSM\_15624\_tRNA-Gly-GCC-1-1 Halobacteriaceae archaea**

GCGCTGG**T**AGTGT**AGTGGTA**TCACGTGACCT**TGCCA**TGGTCACAaCCTGGG**TTCAA**ATCCCAGCCAGCGCA

**Natronococcus\_occultus\_SP4\_Natr\_occu\_SP4\_tRNA-Gly-GCC-1-1 Halobacteriaceae archaea**

GCGCTGG**T**AGTGT**AGTGGTA**TCACGTGACCT**TGCCA**TGGTCACAaCCTGGG**TTCAA**ATCCCAGCCAGCGCA

**Natronomonas\_moolapensis\_8811\_Natr\_mool\_8\_8\_11\_tRNA-Gly-GCC-1-1 Halobacteriaceae archaea**

GCGCTGG**T**AGTGT**AGTGGTA**TCACGTGACCT**TGCCA**TGGTCACAaCCGGGG**TTCAA**ATCCCCGCCAGCGCA

**Nicotiana\_tabacum\_K326\_Ntaba\_K326\_tRNA-Gly-GCC-4-1 Plant (solanacea)**

GCGGAA**AT**AGCTT**AATGGTA**GAGCATAGCCT**TGCCA**AGTCTAAGAtTGAGGG**TTCAAG**TCCCTCTTTCCGCT

**Nitrososphaera\_viennensis\_EN76\_Nitr\_vien\_EN76\_tRNA-Gly-GCC-1-1 Nitrosphaeraceae archaea**

GCGACGG**T**CGTCCAGTT**TGGT**ctAGGACATCAGAT**TGCCA**ATCTGGTAaCCCGGG**TTCAA**ATCCCGGCCGTGCGACCA

**Nonlabens\_dokdonensis\_DSW-6\_Nonl\_dokd\_DSW\_6\_tRNA-Gly-GCC-1-1 Flavobacteria**

GCGAAAG**T**AGCTC**AGGGGTAG**AGCATCACCT**TGCCA**AGGTGGAGGtCGCGAG**TTCAA**ATCTCGTCTTTCGCT

**Oreochromis\_niloticus\_Onilo2\_tRNA-Gly-GCC-11-1 Fish**

CACTTC**AT**AGTAC**AACGGT**TCAGACATTTGCT**TGCCA**TGCAAAAGGtCACTGG**TTCAA**TTTTAGCTGGAGattaaA

**Orientia\_tsutsugamushi\_str\_Boryong\_Orie\_tsut\_Boryong\_tRNA-Gly-GCC-1-1 Rickettsiaceae bacteria**

GCGGATG**T**AGCTC**AGTGGTA**GAGCGTTACTT**TGCCA**AGGTAAAAGtCGTGGG**TTCAA**TTCCCATCATCCGCT

**Oryctolagus\_cuniculus\_Ocuni2\_tRNA-Gly-GCC-21-1 Mammals (rabbit)**

GGAGCTGTGGCATAGTGGTAAGCCGCTGCTGCCATGCCAGCATCCCATATGGgCGCAGGTTCAAGTCCCGGCTGCTCCA

**Oryzias\_latipes\_Olati3\_tRNA-Gly-GCC-2-1 Fish**

GCATTGGTGGTATAGTGGTAGCATAGCTGCTTGCCATGCAGTTGaCCTGGGTTCAAATCCCAGCCAATGCA

**Oscillatoria\_acuminata\_PCC\_6304\_Osci\_acum\_PCC\_6304\_tRNA-Gly-GCC-2-1 Cyanobacteria**

GCGGGTGTGATGTAGTGGTAGCATCTGAGTCTGCCAGTCTCAGTGCATGGGTTCAAATCCCATCATCCGCT

**Otolemur\_garnettii\_Ogarn3\_tRNA-Gly-GCC-5-1 Mammals (primates)**

GCATGGGTGGTTCAGTGGTAGAATTCTCGCTGCCACGCGGGAGGCCCGGGTTCAAATCCCGGCCCATGCA

**Ovis\_aries\_Oarie4\_tRNA-Gly-GCC-1572-1 Mammals (sheep)**

GCATGAGTGGTTCAGTGGTAGAATTCTCACCTGCCACGTGGGAAGCCCAGATTCAAATCCCAGTCCATGCA

**Palaeococcus\_pacificus\_DY20341\_Pala\_paci\_DY20341\_tRNA-Gly-GCC-1-1 Thermococcaceae archaea**

GCGGTGGTAGTCTAGCCTGGCctAGGACTGCGGCCTGCCACGCCGCAAgCCCGGGTTCAAATCCCGGCCACCGCACCA

**Parachlamydia\_acanthamoebae\_UV-7\_Para\_acan\_UV\_7\_tRNA-Gly-GCC-2-1 Chlamydiae bacteria**

GCGGGTGTAGCTCAGTGGTAGAGCATCACGTGCCAACGTGAGGGtCGTGAGTTCAAGCCTCATCACCCGCT

**Paracoccidioides\_brasiliensis\_Pb03\_Para\_bras\_Pb03\_tRNA-Gly-GCC-2-1 Fungus**

GCATCATTGGTCTAGTGGTAGAATTCATCGTTGCCAtccaccgctgtTTCAAcggcggttcggaTTCGATGAGGCC

**Petromyzon\_marinus\_Pmari2\_tRNA-Gly-GCC-4-2 Agnatha (lamprey)**

GCATCGGTGGTTCAGTGGTAGAATTCTCGCTGCCACGCGGGAGGCCCGGGTTCAAATCCCGGCCGATGCA

**Pleurotus\_ostreatus\_PC15\_Pleu\_ostr\_PC15\_tRNA-Gly-GCC-3-2 Fungus**

GCATCAATGGGGTAGTGGTAACCTGGGTGCTGCCAttgagtataTCGACCCGcCGCGAGTTCAAATCTCGCTTGATGCA

**Pleurozium\_schreberi\_Blido\_Pschr1\_tRNA-Gly-GCC-2-1 Plant (moss)**

GCACCAGTGGTCTAGTGGTAGAATAGTACCCTGCCACGGTACAGaCCCGGGTTCAAATCCCGGCTGGTGCA

**Plicaturopsis\_crispa\_FD-325\_SS-3\_Plic\_cris\_FD\_325\_SS\_3\_tRNA-Gly-GCC-2-1 Fungus**

GCGTTAATGGGGTAGTGGTAACCTGGGTGCTGCCAttagcacaTTCGACCAGcCGGGGGTTCAAATCCCCCTTAATGCA

**Pohlia\_nutans\_NOL\_Pnuta1\_tRNA-Gly-GCC-16-1 Plant (moss)**

GAATTGGGgTttTgaGGTCTAGTGGTAGAATAGTATCTGCCACGGTACAGaCCCGGGTTCAAATCCCGGCCGGTGCA

**Polaribacter\_sp\_MED152\_Pola\_MED152\_tRNA-Gly-GCC-1-1 Flavobacteria**

GCGAAAGTAGCTCAGGGGTAAGAGCATCACCTTGCCAAGGTGAGGGtCGCGGGTTCAAATCCCGTCTTTTCGCT

**Pristionchus\_pacificus\_Ppaci4\_tRNA-Gly-GCC-2-1 Nematodes**

TCTCTTGTAAGTATAGTGGTtAGTATCCGCGCCTGCCACGTGCGAGaCCCGGGTTCAATTTCGGCCAGAGAG

**Procavia\_capensis\_Pcape2\_tRNA-Gly-GCC-2068-1 Mammals (daman)**

GGGGCCTcgtTGGCTTAGTGGTTAAGTACTTGATTGCCAACCAAGAGGtTGGTGGTTCAAAACCCAGCAGCTCCA

**Psychroflexus\_torquis\_ATCC\_700755\_Psyc\_torq\_ATCC\_700755\_tRNA-Gly-GCC-1-1 Flavobacteria**

GCGAAAGTAGCTCAGCGGTAGAGCACCACTTGCCAAGGTGGGGGtCGCGGGTTCAAATCCCGTCTTTTCGCT

**Puccinia\_striiformis\_f\_sp\_tritici\_CY32\_Pucc\_stri\_f\_tritici\_CY32\_tRNA-Gly-GCC-8-1 Fungus**

GCaTCTGGTGTTCAGTTGGGACAGCATCAGACTGCCAacatgggctttcactcatgcATCTGAAGGtCCAGTGTTCAAGCCAC  
TGTTGGGACA

**Pyrenochaeta\_lycopersici\_CRA-PAV\_ER\_1211\_Pyre\_lyco\_CRA\_PAV\_ER\_1211\_tRNA-Gly-GCC-2-1 Fungus**

GGCACTTTGGCGGAGTGGTtAACGCGTATGTCTGCCAactaccaccaTTCAAactatcttgctaactcagtc

**Pyrobaculum\_aerophilum\_str\_IM2\_Pyro\_aero\_IM2\_tRNA-Gly-GCC-1-1 Thermoproteaceae archaea**

GCGGCGGTAGTCTAGCCTGGTttAGGATGGCGGCCTGCCAAGCCGTTGAtCCCGGGTTCAAATCCCGGCCCGCCGACCA

**Pyrococcus\_abyssi\_GE5\_Pyro\_abyss\_GE5\_tRNA-Gly-GCC-1-1 Euryarchaeota archaea**

GCGGTGGTGTCTAGCCTGGCctAGGACGCCACCCTGCCAAGGTGGAGACCCGGGTTCAAATCCCGGCCACCGCACCA

**Pyrolobus\_fumarii\_1A\_Pyro\_fuma\_1A\_tRNA-Gly-GCC-1-1 Crenarchaeota archea**

GCGGCGGTTCGTCTAGCCTGGActAGGACGCCGGCCTGCCAAGCCGGAGAtCCCGGGTTCAAATCCCGGCCCGCCGACCA

**Rattus\_norvegicus\_Rnorv6\_tRNA-Gly-GCC-1278-1 Mammals (rat)**

GaGAgATGGCTCAATGGTtaAGAGCACTGACTGCCGtgctcTTCCAGAGGcCGTGAGTTCAAGTCTCAGTAACCA

**Rhizobium\_gallicum\_bv\_gallicum\_R602\_Rhiz\_gall\_bv\_gallicum\_R602\_tRNA-Gly-GCC-1-1 Alphaproteobacteria**

GCGGGTGTAGCTCAGGGGTAAGACACAACCTTGCCAAGGTTGGGGtCGAGGGTTCAAATCCCTTCGCCCCTCCA

**Rhopilema\_esculentum\_Rescu1\_tRNA-Gly-GCC-8-1 Cnidaria (jellyfish)**

GCCACGGTAGCCGAGTGGTtAAGGTGCTCGACTGCCATGCCAGCACTCTgGGTTCAATCCTGGCTCGcaGACA

**Rhytidiadelphus\_loreus\_Rlore1\_tRNA-Gly-GCC-2-1 Bryophyta**

GCACCAGTGGTCTAGTGGTGAATAGTACCCTGCCACGGTACAGaCCCGGGTTCAAATCCCGGCTGGTGCA

**Rickettsia\_massiliae\_MTU5\_Rick\_mass\_MTU5\_tRNA-Gly-GCC-1-1 Rickettsia bacteria**

GCGGGTGTAGCTCAAGGGGTAGAGCGCTACCTTGCCAAGGTGGAAGtCGAGGGTTCAAATCCCTTCACCCGCTCCA

**Rothia\_dentocariosa\_ATCC\_17931\_Roth\_dent\_ATCC\_17931\_tRNA-Gly-GCC-1-1 Actinobacteria**

GCGGTTGTAGCTCAGTTGGTAGAGCACCACCTTGCCAAGGTGGATGtCGCGAGTTCAAGTCTCGTCAACCGCT

**Ruminiclostridium\_thermocellum\_ATCC\_27405\_Rumi\_ther\_ATCC\_27405\_tRNA-Gly-GCC-2-1 Bacillota**

GCGGGTTTAACTCAGTGGTAGAGTGTACCTTGCCAAGGTGAAAGtCGCGAGTTCAAATCTCGTAACCCGCTCCA

**Saccharolobus\_shibatae\_B12\_Sacc\_shib\_B12\_tRNA-Gly-GCC-1-1 Thermoproteota archaea**

GCGGCCGTAGTCTAGCCTGGAttAGGACGCCTGCCTGCCACGCAGGAGGtCCCGGGTTCAAATCCCGGCGGCCGCA

**Salinarchaeum\_sp\_Harcht-Bsk1\_Sali\_Harcht\_Bsk1\_tRNA-Gly-GCC-1-1 Euryarchaeota**

GCGTCGGTAGTGTAGTGGTATCACGTGACCCTGCCACGGTCGCAaCCCGAGTTCAAATCTCGGCCGACGCA

**Schizosaccharomyces\_octosporus\_yFS286\_Schi\_octo\_yFS286\_tRNA-Gly-GCC-2-1 Fungus**

GCTTTGGTGGTTTTAGTGGTATAATGCTTCGTTGCCATCGAAGCGaCCCGGGTTCAAATCCCGGCCGAAGCA

**Sclerotinia\_sclerotiorum\_1980\_UF-70\_Scle\_scle\_1980\_UF\_70\_tRNA-Gly-GCC-7-1 Fungus**

GCGTTTGTGGTTTAAATGGTAAAATCCATCGTTGCCAtcaggggtctcttgttctcatgTTCAAtagataatgaataat  
gTCG

**Serratia\_marcescens\_SM39\_Serr\_marc\_SM39\_tRNA-Gly-GCC-3-1 Enterobacteria**

GCGGGAATAGCTCAGTTGGTAGAGCGCAACCTTGCCAAGGTTGAGGtCGCGAGTTCAAGCCTCGTTTCCCGCTCCA

**Siansivirga\_zeaxanthinifaciens\_CC-SAMT-1\_Sian\_zeax\_CC\_SAMT\_1\_tRNA-Gly-GCC-1-1 Flavobacteria**

GCGAAAGTAGCTCAGGGGTAGAGCATCACCTTGCCAAGGTGAGGGtCGCGGGTTCAAATCCCGTCTTTTCGCT

**Simkania\_negevensis\_Z\_Simk\_nege\_Z\_tRNA-Gly-GCC-1-1 Chlamydia bacteria**

GCGGGTGTAGCTCAAGTGGTAGAGCATCACGTTGCCAACGTGAGGGtCGTGAGTTCAAATCTCATCACCCGCT

**Singulisphaera\_acidiphila\_DSM\_18658\_Sing\_acid\_DSM\_18658\_tRNA-Gly-GCC-1-1 Planctomycetota bacteria**

GCGGGAGTAGCTCAGGGGTAGAGCGCCACGTTGCCAACGTGGTTGtCGTGGGTTCAAATCCCATCTCCCGCT

**Solanum\_lycopersicum\_Heinz\_1706\_Slyco3\_1\_tRNA-Gly-GCC-1-1 Plant (tomato)**

GCGGAAATAGCTTAAATGGTAGAGCATAGCCTTGCCAAGGCTAAGGtTGAGGGTTCAAGTCCCTCCTTCCGCT

**Sorangium\_cellulosum\_So0157-2\_Sora\_cell\_So0157\_2\_tRNA-Gly-GCC-1-2 Myxococcales bacteria**

GCGGGAGTAACTCAGTGGTAGAGTGCAACCTTGCCAAGGTTGACGtCGCGGGTTCAAATCCCGTCTCCCGCTCCA

**Sorex\_araneus\_Saran2\_tRNA-Gly-GCC-29-1 Mammals (shrew)**

GCTcG**ATTCAGTGGTA**GAAATTCTCGG**CTGCCA**CGTGGGAGGCCCGGG**TTCAA**TTCCCGGcccaTGCA

**Spermophilus\_tridecemlineatus\_Strid2\_tRNA-Gly-GCC-4615-1 Mammals (squirrel)**

GgGTtT**TAGCTCAGTGGTA**tAGAGCTTGCCcGCTTGCTAGCatatGCGAGGcTGTAGG**TTCAA**TCCCTAgTACAACA

**Sphaerobolus\_stellatus\_SS14\_Spha\_stel\_SS14\_tRNA-Gly-GCC-1-1 Fungus**

GCACTAA**TGGGGTAGTGGTA**ACCTTGGTCGT**TGCCA**tcgagcaciaTCGACCAGcCAGGGG**TTCAA**TTCCCCTTTAGTGCA

**Sphaerochaeta\_coccoides\_DSM\_17374\_Spha\_cocc\_DSM\_17374\_tRNA-Gly-GCC-1-1 Spirochaetota bacteria**

GCGAGAG**TAGCTCAGTGGTA**GAGCTCCACCT**TGCCA**AGGTGGATGtCGCGGG**TTCAA**ATCCCGTCTCTCGCT

**Sphaerulina\_populicola\_P0202b\_p0202b\_Spha\_popu\_P02\_02b\_p02\_02b\_tRNA-Gly-GCC-1-1 Fungus**

GCACTAG**TGGTTTAGTGGTAA**AATTGCCGCT**TGCCA**tccaaattggatcct**TTCAA**accaggggttctaaag

**Sphagnum\_fallax\_MN\_Sfall1\_tRNA-Gly-GCC-5-1 Bryophyta**

GCGGA**ATAACTTAATGGTAG**AGTATAGCCT**TGCCA**AGGCTGAGGtTGAGGG**TTCAAG**TCCCTTTTTTCGCT

**Spirochaeta\_thermophila\_DSM\_6192\_Spir\_ther\_DSM\_6192\_tRNA-Gly-GCC-1-1 Spirochaetota bacteria**

GCGGGAG**TAGCTCAGTGGTA**GAGCTCCACCT**TGCCA**AGGTGGATGtCGCGGG**TTCAAG**TCCCGTCTCCCGCT

**Spirogloea\_muscolica\_CCAC\_0214\_Smusc1\_tRNA-Gly-GCC-15-1 Algae**

GTGGAAG**TAGGTTACTGGTAG**AGTATAGCAT**TGCCA**AGGCTGAGGtTGAGGG**TTCAAG**TCCCTTGTTCCGCT

**Spodoptera\_frugiperda\_Sfrug1\_tRNA-Gly-GCC-4-1 Lepidoptera**

TGCACaGT**TGGCCCCAGTGGCT**GGGCAACTGA**CTGCC**GTGCAACGTGtCGCGGG**TTCAA**TTCTCGCACGCACAA

**Stereum\_hirsutum\_FP-91666\_SS1\_Ster\_hirs\_FP\_91666\_SS1\_tRNA-Gly-GCC-2-3 Fungus**

GCATCA**ATGGGGTAGTGGTA**ACCTGGGTCGT**TGCCA**tcatgtTTCGAaagcataattgtgtcataTCGACCCGcCGGGGG**TTCAA**TTCCCCCTTGATGCA

**Stigmatella\_aurantiaca\_DW43-1\_Stig\_aura\_DW4\_3\_1\_tRNA-Gly-GCC-1-1 Myxococcales bacteria**

GCGGGA**ATAGCTCAGCGGTAG**AGCATCGCCT**TGCCA**AGGCGAGGGtCGAGGG**TTCAA**ATCCCTTTTCCCGCTCCA

**Strongylocentrotus\_purpuratus\_Spurp5\_tRNA-Gly-GCC-4-1 Echinodermata (urchin)**

GCATCGG**TGGTTTAGTGGTA**GAAATTCTCGC**CTGCCA**CGCGGGGGaCCCGGG**TTCAA**TTCCCGGCCGATGCA

**Sulfobacillus\_acidophilus\_DSM\_10332\_Sulf\_acid\_DSM\_10332\_tRNA-Gly-GCC-1-1 Bacillota**

GCGGAAG**TAGCTCAGTGGTAG**AGCATCGCCT**TGCCA**AGGCGAGGGtCGCGGG**TTCAA**ATCCCGTCTTCCGCTCCA



**Sulfolobus\_islandicus\_HVE104\_Sulf\_isla\_HVE10\_4\_tRNA-Gly-GCC-1-1** Proteoarchaeota

GCGGCCG**T**AGTCTAGCC**TGG**AttAGGACGC**CTGCCTGCCA**CGCAGGAGGtCCCGGG**TTCAA**ATCCCGGCGGCCGCA

**Sus\_scrofa\_Sscro11\_tRNA-Gly-GCC-5-1** Mammals (pig)

GCATGGG**T**GGTTCAGG**GGTA**GAATTCTCAC**CTGCCA**CGTGGGAGGCCCGGG**TTCAA**ATCCCGGCCTGTGCG

**Syntrophobacter\_fumaroxidans\_MPOB\_Synt\_fuma\_MPOB\_tRNA-Gly-GCC-1-1** Thermodesulfobacteriota bacteria

GCGGGA**A**TAACTC**AGC****GGTA**GAGTGCAACCT**TGCCA**AGGTTGAAGtCGCGGG**TTCAA**ATCCCGTTTCCCGCTCCA

**Taeniopygia\_guttata\_Tgutt2\_tRNA-Gly-GCC-10-1** Aves

GCCCTGG**T**GGCTCCG**TGGTA**GAATTCTGC**CTGCCA**CGGCGGCAgCCTGGG**TTCAA**ATCCCGGCAGAGGCA

**Tarsius\_syrichta\_Tsyri2\_tRNA-Gly-GCC-15-1** mammals (tarsier)

ACATGGG**T**AGTTCAG**TGGTA**GAATTCTCGC**CTGCCA**CACAGGAGGCCCGGA**TTCAA**TTACTAACCCATGCAT

**Tepidanaerobacter\_acetatoxydans\_Re1\_Tepi\_acet\_Re1\_tRNA-Gly-GCC-1-1** Bacillota

GCGGAAG**T**GGCTCAG**TGGTA**GAGCATCGCCT**TGCCA**AGGCGAGGGtCGCGGG**TTCAA**ATCCCGTCTTCCGCTCCA

**Terribacillus\_aidingensis\_MP602\_Terr\_aidi\_MP602\_tRNA-Gly-GCC-1-1** Bacillota

GCGGAAG**T**AGTTC**AG****TGGTA**GAACACCACCT**TGCCA**AGGTGGGGGtCGCGAG**TTCAA**ATCTCGTCTTCCGCTCCA

**Terriglobus\_roseus\_DSM\_18391\_Terr\_rose\_DSM\_18391\_tRNA-Gly-GCC-1-1** Acidobacteriota bacteria

GCGGGAG**T**AGCTC**AG****TGGTA**GAGTGCTTCCT**TGCCA**AGGAAGATGtCGCGGG**TTCAA**ATCCCGTCTCCCGCTCCA

**Thaumarchaeota\_archaeon\_SAT1\_Thau\_arch\_SAT1\_tRNA-Gly-GCC-1-1** Thaumarchaeota archaea

GCGGCTG**T**AGTATAGCC**TGG**CcAGTACGCGGGAT**TGCCA**ATTCTGTGACCCGGG**TTCAA**ATCCCGGCAGCCGCA

**Thermacetogenium\_phaeum\_DSM\_12270\_Ther\_phae\_DSM\_12270\_tRNA-Gly-GCC-1-1** Acidobacteriota bacteria

GCGGAAG**T**AGCTCAGC**GGTA**GAGCATCGCCT**TGCCA**AGGCGAGGGcCGCGGG**TTCAA**ATCCCGTCTTCCGCTCCA

**Thermanaerovibrio\_acidaminovorans\_DSM\_6589\_Ther\_acid\_DSM\_6589\_tRNA-Gly-GCC-1-1** Synergistota bacteria

GCGGAAG**T**AGCTCAGG**GGTA**GAGCACAACT**TGCCA**AGGTTGGGGtCGCGGG**TTCAA**ATCCCGTCTTCCGCTCCA

**Thermococcus\_barophilus\_MP\_Ther\_baro\_MP\_tRNA-Gly-GCC-1-1** Euryarchaeota

GCGGTGG**T**AGTCTAGCC**TGG**CctAGGACAGCGGC**CTGCCA**CGCCGCGGGCCCGGG**TTCAA**ATCCCGGCCACCGCACCA

**Thermodesulfatator\_indicus\_DSM\_15286\_Ther\_indi\_DSM\_15286\_tRNA-Gly-GCC-1-1** Thermodesulfobacteriaceae bacteria

GCGGGAG**T**AGCTCAGT**TGGTA**GAGCGCCACCT**TGCCA**AGGTGGATGtCGCGGG**TTCAAG**TCCCGTCTCCCGCTCCA

**Thermodesulfovibrio\_yellowstonii\_DSM\_11347\_Ther\_yell\_DSM\_11347\_tRNA-Gly-GCC-1-1 Methanococcaceae archaea**

GCGGGTGTAGCTCAGCT**TGGTA**GAGCACAACCT**TGCCA**AGGTTGGGGtCGCGGG**TTCAA**ATCCCGTCGCCCCGCT

**Thermofilum\_carboxyditrophus\_1505\_Ther\_carb\_1505\_tRNA-Gly-GCC-1-1 Thermofilaceae archaea**

GCGGCCGTAGTCTAGTC**TGGTA**AGGATGGCGGC**CTGCCA**CGCCGCAGAAaCCCGGG**TTCAA**ATCCCGGCGGCCGCACCA

**Thermogladius\_cellulolyticus\_1633\_Ther\_cell\_1633\_tRNA-Gly-GCC-1-1 Crenarchaeota**

GCGGCGGTTCGTCTAGCC**TGGA**ctAGGACGCCGGC**CTGCCA**CGCCGGAAAtCCCGGG**TTCAA**ATCCCGGCCGCCGCA

**Thermoplasma\_volcanium\_GSS1\_Ther\_volc\_GSS1\_tRNA-Gly-GCC-1-1 Thermoplasmataceae archaea**

GCGGGTGT**TGGT**GTAGCC**TGG**CAACACGCAGCT**TGCCA**AGCTCGTGcCTCGGG**TTCAA**ATCCCGACATCCGCA

**Thermoproteus\_neutrophilus\_V24Sta\_Pyro\_neut\_V24Sta\_tRNA-Gly-GCC-1-1 Thermoproteaceae archaea**

GCGGCGGTAGTCTAGCC**TGGT**TTGGACGACGGGCGGTCCCGTCGCCCCGGAGTAGGATGGCGGC**CTGCCA**AGCCG  
TTGATCCCGGG**TTCAA**ATCCCGGCCGCCGCACCA

**Thermosediminibacter\_oceani\_DSM\_16646\_Ther\_ocea\_DSM\_16646\_tRNA-Gly-GCC-1-1 Bacillota**

GCGGAAG**TGG**CTCAGG**GTA**GAGCATCGCCT**TGCCA**AGGCGAGGGtCGCGGG**TTCAA**ATCCCGTCTTCCGCTCCA

**Thermosipho\_africanus\_TCF52B\_Ther\_afri\_TCF52B\_tRNA-Gly-GCC-1-1 Thermotoga bacteria**

GCGGGTGTAGCTC**AGTGGTA**GAGCGCCTGCT**TGCCA**AGCAGGAGGtCGCGGG**TTCAA**ATCCCGTCGCCCCGCTCCA

**Thermosphaera\_aggregans\_DSM\_11486\_Ther\_aggr\_DSM\_11486\_tRNA-Gly-GCC-1-1 Proteoarchaeota archaea**

GCGGCGGTTCGTCTAGCC**TGGA**ctAGGACGCCGGC**CTGCCA**CGCCGGAAAtCCCGGG**TTCAA**ATCCCGGCCGCCGCA

**Thermovibrio\_ammonificans\_HB-1\_Ther\_ammo\_HB\_1\_tRNA-Gly-GCC-1-1 Desulfurobacteriaceae bacteria**

GCGGGCGTAGCTCAGT**TGGTA**GAGCGCAACCT**TGCCA**AGGTTGAGGtCGCGGG**TTCAAG**TCCCGTCGCCCCGCTCC  
A

**Thermus\_oshimai\_JL-2\_Ther\_oshi\_JL\_2\_tRNA-Gly-GCC-1-2 Deinococcota bacteria**

GCGGGAGTAGCTCAGT**TGGTA**GAGCACGACCT**TGCCA**AGGTCGGGGtCGCGGG**TTCAAG**TCCCGTCTCCCGCTCCA

**Thermus\_scotoductus\_SA-01\_Ther\_scot\_SA\_01\_tRNA-Gly-GCC-1-2 Deinococcota bacteria**

GCGGGAGTAGCTCAGT**TGGTA**GAGCACGACCT**TGCCA**AGGTCGGGGtCGCGGG**TTCAAG**TCCCGTCTCCCGCTCCA

**Thuidium\_tamariscinum\_Ttama2\_tRNA-Gly-GCC-2-1 Bryophyta**

GCGGA**AT**AGCTT**AATGGTA**GAGTATAGCCT**TGCCA**AGGCTGAGGtTGAGGG**TTCAAG**TCCCTTTTTCCGCT

**Treponema\_denticola\_ATCC\_35405\_Trep\_dent\_ATCC\_35405\_tRNA-Gly-GCC-1-1 Spirochaetota**

GCGGGA**AT**AGCTC**AGTGGTA**GAGGCCACCT**TGCCA**AGGTGGATGtCGCGAG**TTCAA**TCCTCGTTTCCCGCT

**Trichechus\_manatus\_latirostris\_Tmana1\_tRNA-Gly-GCC-13456-1 Mammals (manatee)**

ACCCTGG**TGG**CTC**AGTGGT**tAAAGCGCTTGG**CTGCCA**ACCAAAAGGtCATTGG**TTCAA**ACCCATTagctgctCTGTGGGA

**Triticum\_aestivum\_Taest1\_tRNA-Gly-GCC-62-1 Plant (wheat)**

GCACCAG**TGG**TCTAG**TGGT**AGAATAGTACC**CTGCCA**TGGTACAGaCCTGGG**TTCAA**TTCTGGCTGGTGGA

**Turneriella\_parva\_DSM\_21527\_Turn\_parv\_DSM\_21527\_tRNA-Gly-GCC-1-1 Spirochaetota bacteria**

GCGGGA**AT**AGCTC**AGTGGT**AGAGCACCTCCT**TGCCA**AGGAGGGGGtCGTGGG**TTCAAG**TCCCATTTCCTCGCT

**Tursiops\_truncatus\_Ttrun2\_tRNA-Gly-GCC-166-1 Mammals (dolphin)**

GCATTGG**TG**ATT**AGTGGT**AGAATTCTTGC**CTGCCA**CGTGGGAGGCCAGGG**TTCAA**TTCCAGCCAATGCA

**Ustilago\_maydis\_521\_Usti\_mayd\_521\_tRNA-Gly-GCC-2-1 Fungus**

GCATTGG**T**AGTGT**AGTGGT**ATCACGGGACGT**TGCCA**gccccgctta**TTCAAG**gcttaaccacgaatTCGTC

**Vicugna\_pacos\_Vpaco2\_tRNA-Gly-GCC-4-1 mammals (alpaca)**

GGAGGg**T**ATAGCTC**AGTGGT**AGAGTGCATGC**CTGCCA**TGCACAAGGtCCTGGG**TTCAA**TCCCCAGTACCTCCA

**Vitis\_vinifera\_Vvini\_tRNA-Gly-GCC-2-1 Plant (grape)**

GCGGAA**AT**AGCTT**AATGGT**AGAGCATAGCCT**TGCCA**AGGCTGAGGtTGAGGG**TTCAAG**TCCCTCCTTCCGCT

**Volvariella\_volvacea\_V23\_Volv\_volv\_V23\_tRNA-Gly-GCC-1-2 Fungus**

GCATT**AT**GGGGTAG**TGGT**AACCTGGGTCGT**TGCCA**TTCGAttcc**TTCAAG**cTCGACCCGcCGGG

**Waddlia\_chondrophila\_WSU\_86-1044\_Wadd\_chon\_WSU\_86\_1044\_tRNA-Gly-GCC-1-1 Waddliaceae bacteria**

GCGGGTG**T**AGCTC**AGCGGT**AGAGCATCACGT**TGCCA**ACGTGAGGGtCGTGAG**TTCAA**ATCTCATCACCCGCT

**Xenopus\_tropicalis\_Xtrop9\_tRNA-Gly-GCC-4-1 Frog**

GCATTGG**TG**TT**AGTGGT**AGAATTCTCGC**CTGCCA**CGCGGGAGGCCCGGG**TTCAA**TTCCCGCCAATGCA

**Candidate\_division\_SR1\_bacterium\_RAAC1\_SR1\_tRNA-Gly-GCC-1-1 Bacteria**

GCAGGC**AT**AGCTCA**ATTGG**CtAGAGCGCTTCCT**TGCCA**AGGAAGAGGtTGCGGG**TTCAA**ATCCCGTTGCTTGCTCCA

**Uncultured\_Termite\_group\_1\_bacterium\_phylotype\_Rs-D17\_tRNA-Gly-GCC-1-1 Cellulolytic bacteria**

GCGGGTG**T**AGTTC**AGTGGT**AGAACGTCTCGT**TGCCA**ACGAGAAGGtCGTGGG**TTCAAG**TCCCATCGCCCGCT

The above list of 246 species is extracted from GtRNAdB (<http://lowelab.ucsc.edu/GtRNAdb/>), which contains 18,047 tRNA-Gly<sup>GCC</sup> from 4,857 species: Eukaryota 599 (12.3%), Archaea 220 (4.5%) and Bacteria 4,038 (83.1%). The 241 species are the only from the 4,857 species which have both the pentamers TGCCA in the anticodon loop and TTCAA in the Tψ-loop of their tRNA-Gly<sup>GCC</sup> cloverleaf structure. The high proportion of Archaea (54/246 = 22%) is due here to the primitive character of the AL-decamer TGCCATTCAA. The remaining part of AL, GATGAATGGTAC, occurs in articulation and D-loop of the cloverleaf.

**Table S2.** AL-pentamer content in nucleolin (NCL) of species of Figure 2C. Red color represents P-pentamers, blue color corresponds to overlaps.

**Macaca fascicularis nucleolin (NCL), transcript variant X2, mRNA NCBI Reference Sequence: XM\_045367879.1**

ATTAGTGGGGAGGTCTCGCGGCTTCTGGCTAGTTGGTGGCGAGGTGAAGAGCTTCTGCAGGCAGGTAAAA  
 ATCAAGGTGACCCCAAGAAAATGGCTCCTCCTCCAAAGGAGGTAGAAGAAGATAGTGAAAGATGAAAGAAAT  
 GTCAGAAAGATGAAGAAGATGATAGCAGTGGAGAAGAGGTTGTCATACCTCAGAAGAAAGGCAAGAAGGCT  
 GCTGCAACCTCAGCAAAGAAGGTGGTAGTTTCCCCAACAAAAAGGTTGCAGTTGCCACACCAGCCCAAGA  
 AAGCAGCTGTCACTCCAGGCAAAAAGGCAGCAGCAACACCTGCAAGAAGACAGTGACACCAGCCAAAAGC  
 AGTTGCCACACCTGGCAAGAAGGGAGCCACACCAGGCCAAAGCATTGGTAGCAACCCCTGGTAAGAAGGGT  
 GCTGCCATCCCAGCCAAGGGGGCAAAGAATGGTAAGAATGCAAGAAGGAAGACAGTGATGAAGAGGAGG  
 AGGATGACAGTGAGGAAGATGATGAGGATGATGAGGACGAAGATGAGGATGAAGATGAAATTGAACCAGC  
 AGTGATGAAGCAGCAGCTGCTGCCCCCTGCCTCAGAGGATGAGGATGATGAGGATGATGAAGATGATGAG  
 GATGAGGATGATGACGATGAGGAAGATGACTCTGAAGAAGAAGCTATGGAGACTACACCAGCCAAAAGGAA  
 AGAAAGCTGCAAAAGTTGTTCTGTGAAAGCAAGAACGTGGCTGAGGATGAAGATGAAAGAGGATGA  
 TGAGGACGAGGATGATGACGACGATGAAGATGATGAGGATGAAGATGATGATGATGAAGATGAGGAGGAA  
 GAAGAGGAGGAGGAAGAGCCTGTCAAAGAAGCACCTGGAAAACGAAAGAAGGAAATGGCCAAACAGAAAG  
 CAGCTCCTGAAGCCAAAGAACAGAAAGTGAAGGCACAGAACCGACTACAGCTTTCAATCTCTTTGTTGG  
 AAACCTAAACTTTAACAAATCTGCTCCTGAGTTAAAACTGGTATCAGCGATGTTTTTGCTAAAAATGAT  
 CTTGCTGTTGTGGATGTCAGAATTGGTATGACTAGGAAATTTGGTTATGTGGATTTTGAATCTGCTGAAG  
 ACCTGGAGAAAGCCTTGGAACCTCACTGGTTTGAAAGTCTTTGGCAATGAAATTAAGTATAGAGAAACAAA  
 AGGAAAAGACAGTAAGAAGGAGCGAGATCGGAGAACGCTTTTGGCTAAAAATCTCCCTTACAAAGTTACT  
 CAGGATGAATTGAAAGAAGTGTTTGAAGATGCTGCGGAGATCAGATTAGTCAGCAAGGATGGGAAAAGTA  
 AAGGGATTGCTTATATGAATTTAAGACAGAAGCTGATGCAGAGAAAACCTTTGAGGAAAAGCAGGGAAC  
 AGAGATTGATGGGCGATCTATTTCCCTGTACTATACCGGAGAGAAAGGTCAAAAACAAGACTATAGAGGT  
 GGAAAGAATAGCACTTGGAGTGGTGAATCAAAAACCTCTGGTTTAAAGCAACCTCTCCTACAGTGCAACAG  
 AAGAACTCTTCAGGAAGTATTTGAGAAAGCAACTTTTATCAAAGTACCCAGAACCAAAATGGCAAAATC  
 TAAAGGGTATGCATTTATAGAGTTTGCTTCATTTCGAAGATGCTAAAGAAGCTTTAAATTCCTGTAATAAA  
 AGGGAAATTGAGGGCAGAGCAATCAGGCTGGAGTTGCAAGGACCCAGGGGATCACCTAATGCCAGAAGCC  
 AGCCATCCAAACTCTGTTTGTCAAAGGCCTGTCTGAGGATACCACTGAAGAGACATTAAAGGAGTCATT  
 TGACGGCTCTGTTCTGGGCAAGGATAGTCACTGACCGGAAACTGGGTCTCCAAAGGGTTTGGTTTTGTA  
 GACTTCAACAGTGAGGAGGATGCCAAAGCTGCCAAGGAGGCCATGGAAGATGGTGAATTTGATGGAAATA  
 AAGTTACCTTGGAAGTGGGCCAAACCTAAGGGTGAAGGTGGCTTTGGGGGTCGTGGTGGAGGCAGAGGCGG  
 CTTTGGAGGACGAGGTGGTGGCAGAGGAGGCCGAGGAGGATTTGGTGGCAGAGGCCGGGGAGGCTTTGGA  
 GGGCGAGGCGGCTTCCGAGGAGGCAGAGGAGGAGGAGGTGACCACAAGCCACAAGGAAAGAAGACGAAGT  
 TGAATAGCTTCTGTCCCTCGGCTTTCCCTTTTCCATTTGAAAGAAAGGACTCTGGGGTTTTTACTGTTA  
 CCTGATCAATGACAGAGCCTTCTGAGGACATTCGAAGACAGTATACAGTCTGTGGTCTCCTTGAAATC  
 CGTCTAGTTAACATTTCAAGGGCAATACCGTGTGGTTTTGACTGGATATTCAATATAAACTTTTTAAAGA  
 GTTGAGTGATAGAGCTAACCTTATCTGTAAGTTTGAATTTATATTGTTTCATCCCATGTACAAAACCA  
 TTTTTTCTACAAATAGTTTGGGTTTTGTTGTTGTTTCTTTTGTATTTTTTTTTTTTTTCGTTCTGTTGG  
 GTTGTAAGAAAGAAAGAAAGCAGAATGTTTTATGGTTTTTGTCTTCAGCGGCTTTAGGACAAATTTAAAGTC  
 AACTCTGGTGCCAGA

**Observed number of P-pentamers: O = 121** Pentamers number: 2601

Expected number of P-pentamers: E = 22.86 ( $\sigma = 4.78$ ) **O-E = 20.5 $\sigma$**

**Gallus gallus nucleolin (NCL), Mrna NCBI Reference Sequence: NM\_205265.1 >NM\_205265.1 Gallus gallus nucleolin (NCL) mRNA**

GGCCCGCTCCGTTCCCCGCCGCCACCCCCAGGGACGCGCATTCCCACCCCCGAGGCAGTTCGGCCGCCGCCCC  
 AGCGCCGCCAGACACCGCCGCCATCATGGTGAAGCTCGCAAGACTCCCAAGATCAAATGAACAGAAAAAAAT  
 GGCGCCTCCCCCAAAAAGGTGAGGAAAGCGAAGAGGAAGAGTCTCCGACTTAGAGGAAAGCAGCGGGGAAGA  
 GGTGATGGTCCCTCCAAAGAAACAACAAAAAGCAGCAGTTACACCAGCCCAAGAGGCTGCTACCCCTGCAAGAA  
 GGCTGCTACTCCTGCAAAAAGGCAGTGACACCAGCCCAAGAGGCTGTGGCTACTCCAGCTAAAAAGGCTGTTGC  
 TCCATCCCCCAAAAAGGCTGCTGTCTGTAGGCAAGGGGGCAAAAATGGCAAGATGCCAAAAAGGAAGAGAGCGA  
 GGAGGAAGATGAAGACGATGAAGATGATGAGGAAGATGAGGATGAAGAAGAGGAGTCTGATGAGGAAGAGGAACC  
 AGCAGTGCCTGTGAAGCCTGCAGCCAAAAAGTCCGCAGCAGCTGTACCAGCCAAAAAGCCTGCAGTTGTGCCAGC

AAAG**CAAGA**ATCTGAGGAGGAGGAGGAGG**AAGATGATGAA**GAGGAGGACGAGG**AAGATGA**CGAGTCTG**AAGATGA**  
GGCCATGGACACAACCTCTGCTCCTGTGAAGAAACCTACTCCAGCAAAGGCTACACCAGCTAAAGCCAAGGCCGA  
GTCTG**AAGATGAGGAAGATGAGGAGGATGAGGATGAAGATGA**GGAG**GATGAAGATGATGAA**GAGG**AAGATGA**GGGA  
AGAAAGTGAG**GATGAAA**AAACCTGT**TCAAG**GAAGCACCTGGAAAAAGGAAAAAGAAATGGCCAATAAGAGTGCACC  
AGAGGCC**CAAGA**AAAAAGAAAACAGAAACACCTGCTTCAGCTTTCTCACTCTTTCGTGAAAAACTTGACCCCCACCAA  
GGACT**ATGA**AGAACTGAGGACTGCCATCAAAGAATTCTTTGG**CAAGA**AAAAATCTCCAAGTCTCAGAAGTCAGAAT  
CGGTTCTTCCAAGCGGTTTGGCTATGTGGACTTCTTATCTGCTG**AAGAT**ATGGATAAAGCTC**TTCAACATGAA**GG  
AAAGAAGCTGATGGGTTTGGAAATCAAACCTGGAAAAAGCAAAGAGCAAAGAAAGTCTTAAAGAAAAATAAGAAAGA  
GAG**AGATG**CCAGAACACTGTTTGTGAAGAATCTGCCCTACCGTGAACTG**AAGATGAA****ATGAA**AAATGTATTTGA  
AAACGCTTTTAGAAGTCCGACTAGTACTTAACAAGGAAGGGAGCAGCAAAGGGATGGCCTACAT**ATGAAT**CAAAAC  
AGAAGCTGAGGCAGAAAAAGCACTGGAGGAGAAGCAAGGCACAGAGGTTGACGGTTCGTGCCATGGTCATTGACTA  
CACCGGTGAGAAGAGCCAA**CAAGA**AAGTCAGAAAGGAGGTGGAGAGAGGGAGTCAAAGACTCTGATTGTGAACAA  
CCTGTCATATGCTGCCTCAGAAGAACTCTCCAGGAAGTGTAAAAAGCGACTTCCA**TCAAGATG**CCACAGAA  
CAACCAGGGCAGGCCTAAAGGGTATGCATTTGTAGAATTTCCACAGCCGAGGATGCCAAAGAGGCAT**ATGAA**TC  
CTGTAACAACACAGAAATTGAAGGCAGAGCAATCAGGCTGGA**ATTCA**GTTCACCATCGTGGCAGAAAGGGAA**CAA**  
**TGAAGCAAGA**GGAGGATTTAACCAACAAAGCAAAACATTGTTTGTGTCAGAGGCCTTTCTGAGGACACAACGGAGGA  
GACGCTAAGAGAATCATTTGAAGGCTCTATAAGTGCTAGAATAGTCACAGATAGAGACACTGGATCTTCTAAAGG  
GTTTGGTTTTGTGGACTTCAGCTCCCCAG**AAGATG**CCAAAGCAGCTAAAGAAGCTATGGAGGATGGAGAGATAGA  
CGGAAACAAAGTGACCTTTGATTTTGCCAAACCAAGGG**ATGAAT****CA**CGGTGGCGGGCGGATTGTGGTGGTGGATT  
TGGTGGTTCGTGGTGGCAGAGGAGGCAGAGGAGGAGGAAGAGGTGGATTTGGTGGCAGAGGTGGTGGCAGAGGGTT  
TGGAGGTAGAGGAGGTGGCTTCCGAGGAGGCAGAGGAGGAGGTGGAGATCACAAGCCACAAGGGAAG**AAGATCAA**  
**GTTATGAAA**AACTTCCCTTTTCCCTTCTCTTGATCTCTGAGACTATCTGAAAGGACTCCAGGGGTTTTTTA  
TTCTCCTTTTATCTTGGTGGAGCCTTCGGAGGACATTCCAAGGTGCAAAGGAGTACTGTGAGCCACTTGGAAGAA  
AGAATTTTTCAT**TTCAAG**GAAGAAAAGCAAGCTATTTTGTCTGCTTGCTT**ATTCAAG**TGAACCTTTTAAACAGAAAT  
GAGCGATAGCTGTGGGAATTTACCCTTTGTCTGTGAGTTGTCT**ATGAA**TTATAATGTTTTACCCATGTACAAAAA  
TATTTTTTTTCTATAAACTTCTGTAGCATTTTTTTGCTGTAAAAATGCAGAATGTTTTATCATTTGTGCTTCAGC  
ACCCTGTCTTGGACAGATTAAAGGAC

94 2572 22.6 (4.75) 19.8σ

**Bos taurus nucleolin (NCL), mRNA NCBI Reference Sequence: NM\_001206660.1 >NM\_001206660.1 Bos taurus nucleolin (NCL) mRNA**

GATTACTGGGCAGGCTCAGTCTTTTCGCCTCAGTCTCGAGCGCTAGCTGGCAGCCAAGCGTACGCGCTCAGGGATT  
AGCGGCCGCCATCGACGGTGCTTAGGTTCTCTGGACTCGTCTGCGCCACTCGCTCGCCACACACTCCGCCGTCA  
TAAGCCGCCATCATGGTAAAGCTCGCAAAGGCCGGTAAAA**TCAAG**GTGACTC**CAAGA**AAATGGCTCCTCCCCCA  
AAGGAGGTAGAAG**AAGAT**AGTG**AAGATGAGG**AAATGTGAG**AAGATGAA**GAC**GATGA**GAGCAGTGAGAGAAGAGGTT  
GTTATCCCTCAGAAAAAAGG**CAAGA**AGGCTGCCACAACCTCCAGCAAAG**AAGATG**GTGGTTTCCCCAACAAAAAG  
GTTGCAGTTGCCACACCAGCAAAGAAAGCAGTTGTACCCCTGGCAAAAAGGCAGCAGCTATGCCAGC**CAAGA**AG  
ACAGTTACACCTGCCAAAGCAGTGGTTACACCTGGCAAAAAGGGAGCCACCCAGGCAAAGCAGTGGTAGCAACC  
TCTGGTAAGAAGGGAGCAGCCACCCAGGCAAGGGAGCAAAGAACGG**CAAGA**ATGC**CAAGA**AGGAAGACAGT**GAT**  
**GAAGAAGATGAAGATGA**CAGTGAAGAGGAAGAC**GATGATGATGAA**GAGGAG**GATGA**GCCAGCAGTGAGGAAGGCA  
GCTGCTGCTTTTGGTGTCTCCTGCCAC**AGATGATGAGGATGAC**GAG**GATGACGATGATGAC**GAC**GATGA**GGAG  
GAGGAGGAG**GATGAGGAGGATGAGGAGGACGAAGATGA**CTCTGAAGAAGAACCTATGGAGATTGTACCAGCCAAA  
GGAAAGAAAGCTCCAGTAAAAGCTGTTCTGTGAAGGCTAAGAGCACTGCTG**AAGATGAAGATGAA**GAG**GATGAT**  
**GATGATGATGATGATGAA**GAGGAGGAGGAAGAG**GATGACGATGATGAA**GACGACGAC**GATGA**GGAGGAAGAGGAG  
GAGGAGGAAGAGGAGGAAGAGGAAGAAGAGCCTGTCAAAGAAGCACCTGGAAAACGAAAGAAGGAAATGGCCAAA  
CAAAAAGCAGCTCCTGAAGC**CAAGA**AACAAAAAGTGGAAGGCACAGAACCAACTACATCT**TTCAA**TCTCTTTGTT  
GGAAATCTGAAC**TTCAA**TAAATCTGCTCCT**TGAAT**TGAAAACGGGTATCAGTGATCTTTTTTGCTAAAAATGATCTT  
GCTGTTGTTGATGTGAGAATTGGTGTGTCTAGGAAGTTTGGCTATGTGGATTT**TGAAT**CTGCCGAAGACCTGGAA  
AAAGCCTTGGAACCTCACTGGTTTAAAAGTCTTTGGCA**ATGAA**ATTAACTAGAAAAACCAAGGGAAGACAGT  
AAGA**AAGATCGAGATGCAAG**ACACTTCTGGCTAAAAATCTGCCTTACAAAGTTACTCAG**GATGAAT**TAAAAGAA  
GTGTTTG**AAGATG**CTGTGGAGATCAGATTAGTCAGCAAGGATGGAAAGAGTAAAGGGATTGCTTATAT**TGAAT**TT  
AAGACAGAAGCTGATGCAGAAAAAACCTTGGAAGAAAAGCAGGGAACAGAGAT**AGATG**GGCGATCCATTTCTCTG  
TACTACACCGGAGAGAAAGGTCAAAG**TCAAGA**CCATAGAGGTGGAAAGAACAGCACTTGAGTGG**TGAAT**CAAAA

ACCCTGGTTTTTAAGCAATCTCTCCTATAGTGCAACGGAAGAACTCTTCAGGAAGTATTTGAGAAGGCAACTCAT  
A**TCAAG**GTGCCCCAGAACCAAAATGGCAAATCTAAAGGGTATGCATTTATAGAATTTGCTTCATTTG**AAGATG**CT  
AAAGAAGCTTTAA**ATTCA**TGTAATAAAAGGGAAATTGAGGGCAGAGCCATCAGACTGGAGTTGCAAGGACCCAGG  
GGATCACCTAATG**CAAGA**AGCCAGCCATCCAAAACCTCTCTTTGTCAAAGGTCTCTCTGAGGATACACAGAAGAG  
ACGTTAAAAGAGTCGTTTGATGGCTCTATTTCGAGCAAGGATAGTCACTGACCGGGAGACTGGATCCTCCAAAGGG  
TTTGGTTTTGTAGACT**TTCA**ACAGCGAGG**AAGATG**CCAAAGCTGCCAAGGAGGCCATGG**AAGATG**GTGAAATCGAT  
GGAAACAAAGTCACTTTGGACTGGGCCAAACCTAAGGGTGAAGGTGGCTTTGGTGGCCGAGGAGGAGGCAGAGGT  
GGCTTTGGAGGCCGAGGTGGTGGCAGAGGTGGCCGAGGTGGCTTTGGTGGCAGAGGCCGGGGAGGCTTTGGAGGG  
CGAGGAGGCTTCCGAGGAGGCAGAGGAGGAGGAGGAGACCACAAGCCACAAGGAAAAGAAGACGAAGTT**TGAAT**AG  
TTTCTTCTATCCCTTCTCTCCCTCTTCCATTTGAAAGAAAAGGACTCTGGGGTTTTTACTCTGTAACTGATCAAT  
GACAGAGCCTTCTGAGGACATTC**CAAGA**CAGTATACAGCTCTGTGGTCTACTTGGAATCCGTATAGATAACAT**T**  
**TCAAG**GGAGGTAACCTGTTGGTGTGACTGGATATTCGTATAAACTTTTTAAAGAGTGATAGAGCTAACCTTA  
TCTGTAAGTTTT**TGAAT**TTATATTGTTTCTTCCCATGTACAAAACCATTTTTTCTACAGAGTTGTTTTTTTGT  
TTTTTTGTTTTTTTTTTTTTTCGTTGGGGGTGTAAAGGAAAGCAGAACGTTTTATCATGATTTTTGCTTCAGCAA  
TTTTTGGACAGATTAAAGTCCTAGAACTCTGGTGCCAGCCTTGTAACAAAAAAAAAAAAAAAAA

96 2757 24.2 (4.9) 19.6σ

**Budorcas taxicolor nucleolin (NCL), Mrna NCBI Reference Sequence: XM\_052656563. >XM\_052656563.1**

CAGTCTTTTCGCCTCAGTCTCGAGCGCTAGCTGGTTGCCAAGCGTACGCGCTCAGGGATTAGTGGCCGCCATCGAC  
GGTGCTTAGGTTCTCTGGGCTCGTCTGCGCCACTCGCTCGCCACACACTCCGCCGTCATAAGCCGCCATCATGG  
TAAAGCTCGCAAAGGCCGGTAAAA**TCAAG**GTGACTC**CAAGA**AAATGGCTCCTCCCCAAAGGAGGTAGAAG**AAG**  
**ATAGTGAAGATGAGG**AAATGTCAG**AAGATGAA**GAC**GATGA**GAGCAGTGGAGAAGAGGTTGTTATCCCTCAGAAAA  
AAGG**CAAGA**AGGCTACCACAACCTCCAGCAAAG**AAGATG**GTGGTTTCCCAACAAAAAGGTTGCAGTTGCCACAC  
CAGCAAAGAAAGCAGTTGTACCCCTGGCAAAAAGGCAGCAGCTATGCCAGC**CAAGA**AGACAGTTACACCTGCCA  
AAGCAGTGGTAACACCTGGCAAAAAGGGAGCCACCCAGGCAAAGCATTGGTAGCAACCTCTGGTAAGAAGGGAG  
CAGCCACCCAGGCAAGGGAGCAAAGAACGG**CAAGA**ATGCC**CAAGA**AGGAAGACAGT**GATGAA****CAAGATGAAGATG**  
**ACAGTGAAGAGGAAGACGATGATGATGA**AGAGGAG**GATGAA**CCAGCAGTGAGGAAGGCAGCTGCTGCTTTTGGTG  
CTGCTCCTGCCAC**AGATGATGAGGATGAC**GAG**GATGACGATGACGATGATGATGATGA**GGAGGAGGAG**GATGA**GG  
AGGAGGAGGACGAC**GAAGATGA**CTCTGAAGAAGAACCTATGGAGATTGTACCAGCGAAAGGAAAGAAAGCTCCAG  
TAAAAGCTGCTCCTGTGAAAGCTAAGAGCACTGCTG**AAGATGAAGATGAA**AGGAGGAG**GATGATGATGA**GGAGG  
AGGAAGAG**GATGACGATGA**CAGAGGAGGAGGAC**GATGA**GGAGGAAGAGGAGGAGGAGGAGGAGGAAGAAGAGG  
AGGAAGAGGAAGAAGAGCCTGTCAAAGAAGCACCTGGAAAACGAAAGAAGGAAATGGCCAAACAAAAAGCAGCTC  
CTGAAGC**CAAGA**ACAAAAAGTGGAAGGCACAGAACCAACTACGTCT**TTCAA**TCTCTTTATTGAAACCTGAAC**T**  
**TCAATAA**ATCTGCTCCT**TGAAT**TGAAAACGGGTATCAGTGATATTTTTGCTAAAAATGATCTTGCTGTTGTCGATG  
TCAGAATTGGTGTGTCTAGGAAGTTTGGCTATGTGGATTT**TGAAT**CTGCTGAAGACCTGGAAAAAGCCTTGAGC  
TCACTGGTTTTAAAGTCTTTGGCA**ATGAA**ATTAACTAGAAAAACCAAAGGGAAAAGACAGTAAGA**AAGATCGAG**  
**ATGCAAGA**ACACTTTTGGCTAAAAATCTGCCTTACAAAGTTACTCAG**GATGAAT**TAAAAAGAGTGTTTG**AAGATG**  
CTGTGGAGATCAGATTAGTCAGCAAGGATGGAAAGAGTAAAGGGATTGCTTATAT**TGAAT**TTAAGACAGAAGCTG  
ATGCAGAAAAACCTTGAAGAAAAGCAGGGAACAGAGAT**AGATG**GGCGATCCATTTCTCTGTACTACACGGAG  
AGAAAGGCCAAAG**TCAAG**ACCATAGAGGTGGAAAGAATAGCACTTGGAGTGG**TGAAT**CAAAAACCTGGTTTTAA  
GCAACCTCTCCTATAGTGCAACAGAAGAAACACTTCAGGAAGTATTTGAGAAGGCAACTCATA**TCAAG**GTGCCCC  
AGAACCAAAATGGCAAATCTAAAGGGTATGCATTTATAGAATTTGCTTCATTTG**AAGATG**CTAAAGAAGCTTTAA  
**ATTCA**TGTAATAAAAGGGAAATTGAGGGCAGAGCCATCAGACTGGAGTTGCAAGGACCCAGGGGATCACCTAATG  
**CAAGA**AGCCAGCCATC**CAAGA**CTCTCTTTGTCAAAGGTCTCTCTGAGGATACACAGAAGAGACGTTAAAGGAGT  
CCTTTGATGGCTCTATTTCGAGCAAGGATAGTCACTGACCGGGAGACTGGGTCTCCAAAGGGTTTGGTTTTGTAG  
ACTTTAACAGCGAGG**AAGATG**CCAAAGCTGCCAAGGAGGCCATGG**AAGATG**GTGAAATCGATGGAAACAAAGTCA  
CTTTGGATTGGGCCAAACCTAAGGGTGAAGGTGGCTTTGGTGGCCGAGGAGGAGGCAGAGGTGGCTTTGGAGGCC  
GAGGTGGTGGCAGAGGTGGCCGAGGTGGCTTTGGTGGCAGAGGCCGGGGAGGCTTTGGAGGGCGAGGAGGCTTCC  
GAGGAGGCAGAGGAGGAGGAGGAGACCACAAGCCACAAGGAAAAGAAGACGAAGTT**TGAAT**AAATTTCTTCTATCCC  
TGTCTCTCCCTCTTCCATTTGAAAGGAAAGGACTCTGGGGTTTTTACTCTGTTACCTGATCAATGACAGAGCCTT  
CTGAGGACATTC**CAAGA**CAGTATACAGCCCTGTGGTCTACTTGGAATCCATATAGATAACAT**TTCAAG**GGAGAT  
AACCTGTTGGTGTGACTGGATATTCGTATAAACTTTTTAAAG**AGATGA**GTGATAGAGCTAACCTTATCTGT  
AAGTTTT**TGAAT**TTATATTGTTTCTTCCCATGTACAAAACAATTTTTTCTACGGAGTTTTTTTTTTTTTTCGCG

GTTGGGGGGGTGTAAAGGAAAGCAGAATGTTTTATCATGATTTTTGCTTCAGCAATTTTGGGACAGATTAAAAGT  
CCTAGAACTCTG

96 2708 23.8 (4.9) 19.6 $\sigma$

**Rattus norvegicus nucleolin (Ncl), mRNA NCBI Reference Sequence: NM\_012749.2**

CTGGCAGGCGGTTGTACGTGCTCCAGAGTCTTCATTACCCGCCGATCCAGTCGTCTTCGCGTGGGTTCCG  
CTAAGCTCTTCTGAGCTGCTCGCTCTCTACACACGCCGTCGCCGTAATCCGCCATCATGGTGAAACTCGC  
AAAGGCCGGCAAAACCCACGGAGAGTCAAGAAAATGGCTCCTCCTCCAAAGGAGGTGGAAGAAGATAGT  
GAGGATGAAGAAATGTCAGAAGATGAAGATGACAGCAGTGGAGAAGAGGAGGTGTGCATCCCTCAGAAGA  
AAGGCAAAAAGGCTACCACAACCTCCAGCAAGAAGGTGGTTGTTTCACAAACAAAAAGGCTGCAGTTCC  
CACACCAGCTAAGAAAGCAGCTGTTACCCCAGGCAAAAAGGCAGCAGCCACACCAGCAAGAAAGCTGTT  
ACACCAGCCAAAGTAGTTTCCAACACCTGGTAAAAAGGGAGCTGCACAAGCAAAAAGCATTGGTACCAACTC  
CTGGTAAAAAGGGAGCTGTCACTCCAGCCAAGGGGGCTAAGAATGGTAAGAATGCAGGAAGGAGACAG  
CGATGAGGATGAAGATGAAGAGGATGAAGATGACAGCGATGAGGATGAAGATGAAGAGGATGAATTTGAG  
CCACCGGTAGTAAAAGGAGTGAAACCAGCAAAAGCAGCTCCTGCTGCTCCTGCCTCAGAGGATGAGGATG  
AGGAAGATGATGATGATGAAGAAGATGATGATGATGATGAGAGGAGGAGGAGGAGGATGACTCTGA  
GGAAGAAGTTATGGAGATCACACCAGCCAAAGGAAAGAAAACCTCTGCAAAAGTTGTTCTGTGAAAGCC  
AAGAGTGTGGCCGAGGAGGAGGAAGATGATGAGGATGATGAAGATGAAGAGGAGGATGAAGATGAAG  
ATGAAGAGGACGATGAAGATGAGGATGAGGAAGAAGAGGAAGAACCTGTTAAAGCAGCACCTGGAAAAACG  
GAAGAAGGAGATGACCAAGCAGAAAGAAGCCCCCTGAAGCAAGCAAGCAAGCAAGCAAGCAAGCAAGCA  
ACTACACCTTTCAACCTGTTTATTGGAACCTTAATCCAAACAAGTCTGTTGCTGAATTTAAAGTTGCCA  
TCAGTGAACCTTTTTGCTAAAAATGATCTTGCTGCTGTGGATGTCAGAACTGGTACAAATAGGAAATTTGG  
TTATGTTGATTTTGTAGTCTGCTGAAGACCTAGAAAAGGCCCTGGAGCTCACTGGTTTAAAGTTGTTGGC  
AATGAAATTAAGTAAAGTAAAGTAAAGTAAAGTAAAGTAAAGTAAAGTAAAGTAAAGTAAAGTAAAGTAA  
CCAAAACCTCTCTTTCAACATCACTGAGGATGAATTTAAAGAAGTGTGTTGAAGATGCTGTGGAGATCAG  
ATTAGTCAGCCAGGATGGGAGAAGTAAAGGGATTGCTTATATGAATTTAAGTCTGAGGCTGATGCAGAG  
AAAACTTGAAGAAAAGCAGGGGGCAGAAATTGATGGACGGTCTGTTTCACTCTACTACACTGGAGAGA  
AAGGACAAAGGCAAGAGAACTGGAAAGAATAGCACTTGGAGTGGTGAATCAAAGACTTTGGTTTTAAG  
TAACCTTTCTACAGTGCAACAGAAGAAACACTTCAGGAAGTATTCAGAAAAGCAACCTTTATTAAAGTG  
CCCCAGAACCACATGGCAAATCTAAAGGGTATGCATTTATAGAATTTGCTTCATTTGAAGATGCTAAAG  
AAGCTTTAAATTCCTGTAATAAAATGGAAATTGAGGGCAGAAACATCAGGCTGGAGTTGCAAGGACCCAG  
GGGATCACCTAATGCGAGAAGTCAGCCATCCAAAACCTCTGTTTGTCAAAGGTCTGTCTGAGGATACCACT  
GAAGAGACCTTAAAGAATCATTTGAGGGCTCTGTTCTGTGCAAGAATAGTAAGTATGATCGGGAAACTGGTT  
CTTCTAAAGGGTTTGGTTTTGTAGACTTTAATAGTGAGGAAGATGCCAAAGCTGCCAAGGAGGCCATGGA  
AGATGGAGAAATTGATGGAACAAAGTTACCTTGGACTGGGCCAAACCTAAGGGTGAAGGTGGCTTTGGT  
GGTCGAGGTGGAGGCAGAGGAGGTTTCGGAGGCAGAGGTGGTGGCAGAGGCGGAAGAGGCGGATTTGGCG  
GAAGAGGCCGGGAGGCTTTGGAGGCAGAGGAGGCTTCCGAGGCGGCAGAGGAGGCGGGGGAGACTTCAA  
GCCACAAGGAAAGAAGACGAAGTTGAATAGTTTCCCTCCATCCCATTCTTTCCCTCTTCATTTTAAAGAA  
AGGACTCTGGAGTTTTTACTCTGTACCTGTGAATGACAGAGCCTTTAAGGACATTCAGACAGTAA  
AGATCCTAACTCTGAA

107 2393 21 (4.6) 18.8 $\sigma$

**Solanum lycopersicum nucleolin (LOC101260453), mRNA NCBI Reference Sequence: XM\_010326160.3**

CAACTGCGCCACCACCCCAATTGTTCACTAACTATCACATATTATTATTTAATCCTAGAAGTTAAAAACT  
TTGTCAATAAACGCCATCGTTCTTGCTCTATCTTCTTACATGTCTAGGGTTTTTCACATCTTCCCTCTT  
TCATCACCAAGCAAACCCCTCATTCAGTCTCAGGTGAATTTTCCGACATGGCTATCGTCAATGATGAACG  
CGAGTTTGAGGAAGAAACAACCTATGAAGATCTCAAGAGTTTGACGAAGATGCGGAAGTGACGCCGAG  
GACGATGATGACGAGGACGATGATGATGAAGACGGTGATGAGGATGATGATGATGATGATGATGATGATG  
TACAGAGCTCTGGCAGTGGTCCACAAGTTCCTCTATAGATGATGATGAGGAGGATGAGGATGATGATGAT  
TGAGGACGATGAAGGTGACAGTGATGATGATGACGACGACGACGATGATGAAGATGATGAAGATGAG  
GAGGAAGGTGAAGAAGAGGGAGATCTGGGCACGGAGTATCTTGTTAGGCCAGTGGCACGTGCTGAGGATG  
AAGAAGATGCTAGTGATTTTGAACCAGAAGAAAATGGCGAGGAAGAGGGTTTTGAGGAGGAAGAGGAAGA  
GGATGATGATGAAGACACTAGCGGAAAGGTGGAGGCCCCGCCAAAGAGGAAGAGATCAAGCAAGATGAT  
GACTCTGACGATGATGATGGCGGAGAGGATGAGGATGAGGATGATGATGATGATGATGATGATGATGATG  
TAGGCCCTATATAGTATAGAGGTCAATCCCCCTTCATGTATGATGATGATGATGATGATGATGATGATGAT  
TCTAATCACTGTTGGGATTATGACACCATTTTAGTTTAGTTTAGTTTAGTTTAGTTTAGTTTAGTTTAGTT  
CAAGATTTTTTTTTTAATTGTATGTGTTGGTGTGTTTTTAGTTGTTTCAACTCTGTTTGGTCTGCTATTTG  
GTGCAAGTATTTATATATGTTGGGCTTAGTTTAAACACA

63 1015 8.9 (3) 18.1 $\sigma$

**Hydrotalea sandarakina strain DSM 23241 LX80DRAFT\_scaffold00007.7, GenBank: QKZV01000007.1: c63436-63011 nucleolin**  
ATGGCAG**CAAGAT**CTGATAAGGATAAAAAATCCGAACCCAACAAAAAGTACCTGAAACGGGTAGTAAAA  
AAGTATCT**TTCA**AAAAAGAAAATTGAAG**AAGATGATGA**TTTT**GATGAAGATGATGAAGATG**TAAAAACCAAA  
AAAATCTGCAGCAGCTTCT**TTCA**AAAAAGAAAAAAATTG**AAGATGATGATGACGATGA**TTATGAG**GATGAA**  
ATAG**AAGATGAT**TGGGAAAAACAGAAG**AAGATGAT**GACTGGGATCCCGACTTC**GATGAAT**TTGACATTC  
CCAAATCAT**CAAGT**AAAAAAGCAGGTGGCTCTAAAAAGAAATCATCAA**AAGATGATGACGACGACGACTT**  
TAAAATT**GATGAAGAT**TTTAAAGAGTTCGATTTATTT**GATGA**CAAG**GATGA**TTTT**GATGACGATGACGAT**  
TTTTAA

**46** 422 3.7 (1.9) **16.8 $\sigma$**

**Rhinolophus ferrumequinum nucleolin (NCL) mRNA NCBI Reference Sequence: XM\_033112353.1**

CAGAGGCGATTACTGGGCAGGCTCAGTCTTTTCGCCTCAGTCTCGAGCTCTAGCTGGCAGCCAAGTATACGCGCTC  
CGGATCTTCAGTACCAGCGGCCCCATAGACGTCGTTGCGTTCTCTGGGCTCATTTGCGCCACTCGTCCGCCAC  
ACATTCCGCCGTCATAAACCGCCATCATGGTAAAGCTTGCAAAGGCCAGTAAAA**TC**AAGGTGACCC**CAAGA**AAA  
TGGCTCCTCCCCAAAGGAGATAGAAG**AAGATAGTG****AAGATGA**GGAAATGTCAG**AAGATGAA****AAGATGAA**AGCA  
GCGGAGAAGAGGTTGTCTTCCTCAGAAAAAAGG**CAAGA**AGGCTACCACTACTCCAGCAAAGAAGGTGATGGTTT  
CCCCAACAAAAAAGGTTGCAGTTGCCACACCAGC**CAAGA**AAGCAGTTGTACCCCCAGCAAAAAGGCAGTGGCTA  
CACCAGCCCTTGCCAAAAAGGCAGCAGTTACACCAGCCAAAGCAGTGGTGACACCTGG**CAAGA**AGGGAGCCACAC  
CAGGCAAAGCATTGGTAGCAACCCCTGGCAAAAAAGGAGCAGCCACCCAGCCAAAGGGAGC**CAAGA**ATGG**CAAGA**  
ATGC**CAAGA**AGGAAGACAGT**GATGAGGA****AAGATGAT**GACAGTGAAGAGG**AAGATGAGGATGAAGATGA**GGACG**AAG**  
**ATGAGGATGAGGATGAAT**TTGAGCCAGCAGT**GATGAA**AGCAGCAGCTACTGCTGCTGCCTC**AGATGA**GGAGGAGG  
AGGAAGAC**GATGATGAGGA****AAGATGACGAGGATGATGATGATGATGATGATGATGATGAGGAAG****AAGATGA**CTCAGAAGAGGAAC  
CCATGGAGGTTATACCAGCCAAAGG**CAAGA**AAGCTCCTGCAAAGCTGTTTCTGTGAAGGC**CAAGA**GCACCGC**AG**  
**ATGATGA**AGACGAAGAG**GATGACGAGGATGACGAGGATGATGAGGATGATGAGGATGAGGACGAGGATGA**GGAGG  
AC**GATGA**AGAGGAGGACGAG**GATGA**AGGAGGAAGAGCCTGTCAAAGAAGCACCTGGAAAAAGGAAAGGAAATGG  
CCAAACAGAAAGCAGCTCCTGAAGC**CAAGA**AACAGAAGGTGGAAGGCACAGAACCGACCACATCT**TTCA**ATCTAT  
TTGTTGGAACCTGAAC**TTCA**ACAAATCTGCTCCT**TGAAT**TAAAACTGGTATCAGTGACATTTTGTCTAAAAATG  
ATCTTGCTGTTGTGGATGTCAGAAATGGTGTGTCTAGGAAGTTTGGCTATGTGGATTT**TGAAT**CTGCTGAAGACC  
TGGAAAAAGCCTTGGAACACAGGTTTAAAGTCTTTGGCA**ATGAA**ATTAACTAGAAAAACCAAGGGAAAAAG  
ACAGTAAAA**AAGATCGAGATGA****CAAG**ACACTTTTGGCTAAAAATCTGCCTTATAAAGTTACTCAG**GATGAAT**TAA  
AAGAAGTGTTT**AAGATG**CTATGGAGATCAGATTAGTCAGCAAGGATGGAAAAGAGTAAAGGGATTGCTTATAT**TG**  
**AAT**TTAAGACAGAAGCTGATGCAGAGAAAACGTTGGAAGAAAAGCAGGGAACAGAGAT**AGATG**GGCGATCCATTT  
CCCTGTACTATACCGGAGAGAAAGGTCAAAA**TC**AAGACTACAGAGGTGGAAAGAATAGCACTTGGAGTG**TGAAT**  
CAAAACTCTGGTTTTAAAGCAACCTCTCCTACAGTGCAACAGAAGAACTCTTCAGGAAGTATTTGAGAAGGCCAA  
CTTTTATCAAAGTGCCCCAGAACCAAAATGGCAAATCTAAAGGGTATGCATTTATAGAATTTGCGTCATTT**G****AAG**  
**ATG**CTAAAGAAGCTTTAAATTCTTGTAATAAAAGAGAAATTGAGGGCAGAGCAATCAGGCTGGAGTTGCAAGGAC  
CTAGGGGATCACCTAATG**CAAGA**AGCCAGCCATCCAAAACCTTTGTTTGTCAAAGGTCTGTCTGAGGAGACTACAG  
AAGAGACATTAAAGGAGTCATTTGACGGCTCTGTTTCGGGCAAGGATAGTCACCGACCGGGAGACTGGGTCTTCCA  
AAGGGTTTGGTTTTGTGGAC**TTCA**ATAGTGAGG**AAGATG**CCAAAGCCGCTAAGGAGGCCATGGAAGACGGTGAAA  
TTGATGGAAACAAAGTTACTTTGGACTGGGCCAAGCCTAAGGGTGAAGGTGGCTTTGGAGGTCTGGCGGAGGCCA  
GAGGTGGCTTTGGAGGCCGAGGTGGTGGCCGCGGAGGCCGAGGTGGATTTGGTGGCAGAGGCCGGGGAGGCTTTG  
GAGGGCGAGGAGGCTTCCGAGGAGGCAGAGGAGGAGGAGACCACAAGCCACAAGGAAAGAAGACGAAGTT**TGAAT**  
AGTTTGTCTATCCCGGTCTTTCCCTTTTCCGTTGGAAAGAAAGGACTCTGGGGTTTTTACTGTTACCTGGTCAA  
TGACAGAGCCTTCTAAGGACATTC**CAAGAC**CAGCATACAGTCCTGTGGTCTACTTGGAATCCGTATAGATAACAT  
**TTCA**AGGGAGATAACCTGTTGGTTTTGACTGGAT**ATTCA**TATAAACTTTTTAAAG**AGATGA**GTGCTAGAGCTAA  
CCCTTATCTGTAAGTTT**TGAAT**TTATATTGTTTGTTCCTGTCAGGTTTCTAGGTTTCTGCGCCACTCGCCCGCCACACACTCCGCC  
GTCATAACCCGCCATCATGGTGAAGCTCGCAAAGGCCGGTAAAA**TC**AAGGTGACCC**CAAGA**AAATGGCTCCTCC

**104** 2712 23,83 (4,88) **16.4 $\sigma$**

**Sciurus carolinensis nucleolin (Ncl), mRNA NCBI Reference Sequence: XM\_047547319.1**

TGGGCAGGCTCAGTCTTTTCGCCTCAGTCTCTAGCTGTAGCTGGCCGCCAGGCGTACGTGCTCCGGCATCTTCAGT  
ACCCGAGGGCCGCCATCGACGTCGCTTCAGTTCTCTAGGTTTCATCTGCGCCACTCGCCCGCCACACACTCCGCC  
GTCATAACCCGCCATCATGGTGAAGCTCGCAAAGGCCGGTAAAA**TC**AAGGTGACCC**CAAGA**AAATGGCTCCTCC



ACCAAAGGAGGTAGAAG**AAGAT**AGTGA**AAGATG**AGGAAATGTCAG**AAGATGAA****AAGATGA**CAGCAGTGGAGAGGA  
 GGTGGTCATTCTCAGAAGAAAGG**CAAGA**AGGCTACTGCAACTCCAGCAAAGAAGGTGGTAGTTTCCCCAACAAA  
 AAAGGTGGCAATTGCCACACCTGC**CAAGA**AAGCAGCTGTCGCTTCAGGCCAAAAAGGCAGCAGCCACACCAGC**CAA**  
**GA**AGACAGTTACACCAGCCAAAGCAGTTACAACACCTGG**CAAGA**AGGGAGCCACTCTGGGTAAAGCATTGGTAGC  
 AGCCCCGTGGTAAGAAGGGAGCTGTTGCCCCAGCCAAGGGGGCAAATAATGG**CAAGA**ATGC**CAAGA**AGGAAGACAG  
 C**GATG**AGGAGGAG**GATGAT**ACAGCGAGG**AAGATGATGATGAAGATGATGAGGATGAGGATGAAGATGAAT**TTGA  
 ACCAGCAGT**GATGAA**AGCAGCAGCTGCTGCCCCCTGCCTCAGAG**GATGAGGATGATGATGAGGATGACGACGAAGA**  
**TGATG**AGGACGAG**GATGAGGAGGAGGAAGATGA**CTCTGAAGAAGAAGCTATGGAGATCACACCAGCCAAAGGAAA  
 GAAAGCTGCTGCAAAAGCCGCACCAGTGAAAGC**CAAGA**GTGTGGCTGAGGAG**GATGAA**GAGGAGC**AAGATGA**GGGA  
 CG**AAGATGATGATGATGAAGAGGATGAGGACGAGGAAGATGAAGATGATGAGGAGGAGGAAGAGGAGGAGGAAGA**  
 AGAAGAGCCTGTCAAAGAAGCGCCTGGAAAACGAAAGAAGGAAATGGCCAAACAGAAGGCAGCCCCCTGAAGC**CAA**  
**GAA**ACAGAAAGTGAAGGCACAGAACCAACTACATCGTTTAACTCTCTTCGTTGGAAACC**TGAAT**TCTAACAAATC  
 TGCTCCTGAACTAAAAATTGGTATCAGTGAACCTTTTGCAAAAAATGATCTGGCTGCTGTGGATGTCAGAATTGG  
 AACGACTAGGAAGTTTGGCTATGTGGATTT**TGAAT**CTGCTG**AAGAT**CTGGAAAAAGCCTTGGAACCTACTGGTTT  
 AAAACTTTTTGGCA**ATGAA**ATTAACTAGAGAAACCAAAAGGAAAAGACAGTAAGA**AAGATCGAGATGCAAG**AC  
 ACTTTTGGCCAAAAATCTCCCTTACAAAGTCACTCAG**GATGAA**CTAAAAAGAGTGT**TGAAGATG**CCATGGAGAT  
 CAGATTAGTCAGCAAGGATGGGAAGAGTAAAGGGATTGCTTATAT**TGAAT**TTAAGACAGAAGCTGATGCAGAGAA  
 AACCTTTGAAGAAAAGCAGGGAACAGAGATTGATGGGCGATCTGTTTCCCTCTACTACACTGGAGAGAAAGGTCA  
 AAA**CAAG**ACTACAGAGGTGGAAAAAATAGCACTTGAGTGG**TGAAT**CAAAAACTCTGGTTTTAAGCAACCTCTC  
 TTACAATGCAACAGAAGAACTCTTCAGGAAGTATTTGAGAAGGCAACTTTTATCAAAGTACCCAGAACCAAAA  
 TGGCAAATCTAAAGGTATGCCTTTATAGAGTTTGCTTCATTTG**AAGATG**CAAAAGAAGCTTTAAATTCCTGTAA  
 TAAAAGGGAAATTGAGGGCAGAGCAATCAGGCTGGAGTTGCAAGGACCCAGGGGATCGCCTAACG**CAAGA**AGCCA  
 GCCATCAAAAACTCTGTTTGTCAAAGGTCTGTCTG**AAGAT**ACCACCGAAGAAACCTTAAAAAGAAATCATTTGACGG  
 CTCTGTCCGTGCAAGGATAGTCACTGACCGGGAAACCGGATCCTCCAAAGGGTTTGGTTTTGTAGAC**TTCAA**CAG  
 TGAGG**AAGATG**CCAAAGCTGCCAAAGAGGCCATGG**AAGATG**GTGAAATTGATGGAAACAAAGTTACCTTGGACTG  
 GGCCAAAGCCTAAAGGGGAAGGTGGCTTTGGGGTTCGTGGTGGAGGAAGAGGAGGCTTTGGAGGCAGAGGTGGCGG  
 CCGAGGAGGCAGAGGTGGATTTGGCGGCAGAGGCCGGGGAGGCTTTGGAGGGCGAGGAGGCTTCCGAGGAGGCAG  
 AGGGGGAGGAGGAGACCACAAGCCACAAGGAAAGAAGACGAAGTT**TGAAT**AGTTTCTTCTGTCCCTGTCTTTCCC  
 TCTTCCATTTGAAAGAAAGGACTCTGGGGTTTTTAACTCTGTACCTG**TTCAA**TGACAGAGCCTTCTGAGGACA  
 TT**CAAGA**CAGTATATGGTCCTGTGGTCTACTTGAAATCGTATAGGTGACAT**TTCAA**AGGAGATACCTGTGG  
 TTTTGACTGGAT**ATTCAT**ATAAACTTTTTTAAAG**AGATGAGT**GATAGAGCTAACCTTATCTGTAAGTTT**TGAAT**T  
 TATATTGTTTCATCCCATGTACAAAACCTGTTTTTTTCTACAAATAGTTTTTTGTTTTGTTTGGCGTTGGGGGT  
 ATAAAGGAAAGCAGAATGTTTTATGAGTTTTGCTTCAGTGACTTTAGGACAAATTAAAAAGTCCTAAACTCTG

103 2693 23, 66 (4, 86) 16.3σ

*Microtus fortis* nucleolin (Ncl), mRNA NCBI Reference Sequence: XM\_050123112.1 >XM\_050123112.1

AGTCTTTTGCCTCAGACGCTAGTTGTAGCTGGCAGTCAGTCGTACGTCTCCTGTGTCTTCAGTGCCCGCCGCTG  
 CCGTCGAGTTCGCGTCGGTTCTCCCGGGCTCTTCTGAGCTGCTTACTGCGCCGCCGCCGTCATCCGCCACCATGG  
 TGAAGCTCGCAAAGGCCGGCAAACCCACGG**TGAATCAAGA**AAATGGCTCCTCCTCCAAAGGAAGTGGAAG**AA**  
**ATAGT**GAG**GATGAAG**AAATGTCAG**AAGATGAAGAAGATGA**CAGCAGTGGAGAAGAGGAGGTTGTCATTCTCAGA  
 AAAAAGC**CAAGA**AGGCTGTAACCTCCAGCAAAGAAGGTAGTTGTTTCAAAACAAAAAGGTTGCAGTTCCACAC  
 CAGCTAAGAAGGCTGCTGTTACCCCAGGTAAAAAGGCAGCAGCCACACCAGC**CAAGA**AGGCAGTTACACCAGCCA  
 AAGCAGTTGCAACACCTGGTAAGAAGGGAATCGCACAAAGCAAAAGCACTGGTAGCAGCCTCTGGTAAAAAGGGAG  
 CTGTCACACCAGCCAAGGGCGCTAAGAATGGTAAGAATGCGAAGAAGGAAGAGAGT**GATGAAGATGATGACGACG**  
**ATGAAGA**AGACGACAGT**GATGAGGATGAAGATGATGAGGA**AGAGGAGGAATTTGAACCACAGTAGTGAAAGGAG  
 GGAAGCCAGCAAAGTAGCTGCTGCTGCTCCTGCTTCAGAG**GATGAAGATGAGGAAGATGATGAGGAAGATGATG**  
**ATGATGATGAAGAAGATGATGACT**CTGAGGAAGAAGCTATGGAGATCGCACCTGCTAAAGGAAAGAAAGCTCCTG  
 CAAAAGTTGTTTCTGTGAAAACCAAGGCTGTGGCTGAAGAG**GATGATGAGGATGATGAAGATGATGAGGATGATG**  
**ATGAAG**AGGAGGAGGAAG**AAGATGAAGAGGAGGAAGAAAGATGAAGAGGAGGAAGAGAGCCTGTTAAAGTAGCAC**  
 CTGGAAAAAGGAAGAAGGAAATGACCAAGCAGAAAGAAGTCCCCGAAGC**CAAGA**ACAGAAAGTGGTGGAAGGCT  
 CGGAATCAACAACACCTTACAATCTCTTCATTGGAAACCTTAATCCAAACAAGTCTGTTGCAGAATTAA**AAGATG**  
 CCATCAGTGAACCTTTTTGCTAAAAATGATCTTGCTGTTGTGGATGTCAGAACTGGTACTAATAGGAAATTTGGCT  
 ATGTGGACTTTGAGTCTGCTGAAGAC**CAAGA**AAAGGCCTTGGAACCTCACTGGTTTAAAGTGT**TTGGCAATGAA**  
 TTAACCTAGAAAAACCGAAAGGAAGAGATAGTAAGAAAGTTTCAGCTG**CAAGA**ACACTTTTAGCAAAAAACCTTT  
**CATTCAA**CATCACTGAG**GATGATTT**AAAAAGAAGCATT**TGAAGATG**CTGTTGAGATCAGAATGGTTACC**CAAGATG**

GGAGGTGTAAAGGGATTGCTTACAT**TGAAT**TTAAGTCTGAAGCTGATGCACAGAAAAACCTTGAAGAGAAGCAGG  
GGACAGAAATTGATGGGCGATCTGTTTCACTCTACTACACTGGGGGAGAAAGGACAACAAAGG**CAAGA**AAGACCTG  
GAAAGAATAGTACTTGGAGTGG**TGAAT**CAAAAACCTTTGGTTTTAAGTAACCTTTCTACAGTGCAACAGAAAGAA  
CTCTTCAGGAGGTATTTGAGAAAGCAACTTTTATCAAAGTGCCCCAGAACCAACAAGGC AAAATCTAAAGGGTATG  
**CATTCAT**AGAATTTGCTTCATTT**GAGATG**CTAAAGAAGCTTTAAGCTCCTGTAATAAAATGGAAATCGAGGGCA  
GAACAATCAGGCTGGAGTTACAAGGACCCAGGGGATCAGCTAACG**CAAGA**AGTCAGCCATCCAAAACCTCTGTTTG  
TCAAAGGTCTTTCTG**AAGAT**ACCACTGAGGAGACCTTAAAAGAATCATTGAGGGCTCTGTTCTG**CAAGA**ATCG  
TCACAGATCGGGAACAGGTTCTCTAAAGGGTTTGGTTTTGTAGAT**TTCAA**TAGTGAGG**AAGATG**CCAAAGCTG  
CCAAGGAGGCCATGG**AAGATG**GAGAAATTGATGGAAACAAAGTTACTTTGGACTGGGCCAAACCTAAGGGTGAGG  
GTGGCTTTTGGTGGCCGAGGAGGAGGCAGAGGAGGTTTTGGAGGACGAGGCGGTGGCAGAGGAGGAAGAGGCGGAT  
TTGGCGGCAGAGGAGGCCGGGGAGGCTTTGGAGGTGAGGAGGCTTCCGAGGTGGCAGAGGAGGAGGAGGAGGGG  
GAGAC**TTCAAG**CCACAAGGAAGAAGACGAAGTT**TGAAT**AATTCCTTCCAGCCCAATCTTTCTCT**GATTCAT**TTTTA  
AAGAAAGGACTCTGGGGTTTTTACACTGTTACCTGTTAAAAATGACAGAGCCTTTTAAAGGACATTTCCAGAGGTTT  
TTTTCTACAGTCTTTTCTTTTTGTGTTGGGGTTGTAAAAGAATGTTTATCATGTTTTTTTTTTTTTTTTTTTTT  
TTTTGCCTCAGTGACTTTAGGACAAATTAAGAGTCTAACTCTGGTGCCAGATTTGTACCTTCTAAATGTTCC  
TTTTGGAATGATGTTTAAGAGCTCAG**CAAGAC**CAACTCTGCT**ATTCA**GACAGATTCTGACTAGTGGGGATTTGAG  
GTGTGTTCTGCT**TTCAAGA**ATCCCGACTACAAAAGTGGAATTAGTTTGAGGGGAGGAAGCACAGCAGTTTCTG  
AACTGGAAGGTTTGT**TGAAGATG**CTGCATTTGCACCTC**AGATG**TGGGTGTAAGTGGACAATTGGTGTTGAGCAAC  
ACATGGATCATTGCTGAAATGGCAGTAAAGTAAAGCCATA**CAAGA**

103 2816 24.75 (4.97) 15.7σ

**Bauhinia variegata isolate BV-YZ2020 chromosome 1, GenBank: JAKRYI020000001.1: 6791445-6797144 nucleolin**

TCCCCAAACCTAAACTCTGTGACGCGTAGGGTTTTGCAGAGCTTCTCGTTATCTATCCATTTCTCGAC  
CTTTTTCTATTCTTTGTGTCTAATATGGCAAAGTCTAG**CAAGA**AATCAGCTTCCAAAGTTGAGTCCGCTC  
CAGCCGTCGTTCCAAAATCTGCGAAGAAAGGTGCTAAGCGAGAAGCTGAG**GATGAG**GCTTGAGAAGCTGGC  
GAGTGCAAAGAAGCAGAAAAG**AGATGAG**GCTTGCTGACAAGCAAT**TGAAT**GCGAAGGTGCAAAAAGAAAAAG  
AAACCGCAAAGTAGTTCATCTGATTCTCTTCATCCAATTCTGAGGAGGATAAGAAACCTGCTGTTAAAG  
TTCCTATTCC**TTCAA**AGAAGCAACCTGGCCCTGCAAAGAAAAGCAAGCCAGCAAGCAGCTCCAGTTCTGA  
CTCTTCT**GATGACTCAAGT**GAG**GATGAAG**CTCCAAAATCTAAGG**TGAAT**GGACCTGCCGCGGGTAA**GAAT**  
**GG**ACCTGCTGCTACACGAAGAAGTTGATTCTAGTGAAAGCTCTGACTCT**GATGA**CAGCAGCTCG**GATG**  
**AAGAT**AATGCTCCAAAATCCAGGGTGAACGGAGCGGCTGCTGGTAAGAATGGACCTGCTACTACAAAGAA  
AAAAGCTGATTCTAGTGAAAGCTCTG**ATTCA**GATGACAGCAGTT**AGATGAAGAT**TTGGCAGCTGCAGTT  
GCTCCTAAGAAGAAAGTGGAAGCAGTTGCTCCAAAGAAAAAGTTGAGAGCAGTGACAGCTCAG**AAGATG**  
**AATCAAG**CGCTGAAG**AAGATA**ATG**ATTCAA**AACTAAGGAA**AAGATG**GATGTT**GATGATGA**TAGTTCTGA  
AGAAAGTGAAGAAGAGCCACAAAAGAAAAATATCAAAGGCTTGCCAAATGCTGGAAAACCTAATGTAAAA  
GCTGTCAAAGGATAGCAGTAGTGATGGTT**CAGAGGATGATGA**TAGCTCTGAAGAG**GATGA**CAAAGTAA  
AAAAGCCAAATGCTGGAAAACCTAATGTAAAAGCTGTTGAAAAGGGTAATAGTAGTGATAGCTC**AGATGA**  
**TGAAGATGA**TAGCTCTGAAGAG**GATGAG**AAAGTGAAAAGCCAAATGCTGCAAAACCAAGTGTAATCT  
GTCAAAGGATAGCAGCAGTGATAGCTC**AGATGATGAAGATGA**TAAGTCTGAAGAG**GATGA**GAGAGTGA  
AAAAGCCGATTGCCACAT**CAAGT**GCTGGAAAACCTGGTGTAAGGTTGTCAAAGGATAGCAGTAGTGA  
TAGCTC**AGATGAAGATGA**TAGCTCTGAAGAGGAG**GATGA**GATAGTGAAAAAGCCAAAGACTACACCAAAT  
GCTGGAAAACCTAGTGCAAATCTGTCAAAGGATAGCAGTAGTGATAGCTC**AGATGA****TGAAGATGA**TA  
GCTCTGAGGAGGATGTAAATCTGTCAAAGGCTA**AAGATGTGAAGATG**GTTGATGCAGCCTCACCAGA  
GCCAACTT**CAAGA**ATTTTA**ATTCA**GCATCTGCTAAGAAAACCTCCTAAGACTCCAGCTACCCCTGTAGAA  
CAAAATTCACAGGAAGGACACTATTTGTTGGAACCTTGTCATATAGTGTTGGAAGAGCTGATGTGGA  
ATTTCTTCATAGATTGTGGAGAAGTTGTTGATGTCCGCTTGCTGT**AGATGATGA****GAAG**AGGTTAAAG  
TTTTGGACATGTTGAGTTTGCTACTGCAGAGAGCCCAAAATGCCCTGAAGT**TGAAT**CAAA**ATGAAT**TG  
TTGAGACGACCCGTCAAACCTTGATCTGGCAGAGAAAGGGCTCATATACCCCTAACAGCAGCAACTGGA  
GCAACTCCTTCCAGAAAGGTGGAAGAGGTGAGTCTCAAACAGTATTTGTTAGGGGTTTTGACTCATCCCT  
**AGATGA**AAGCAGATTAGGTCTAATCTGGAGGAGCATTTTAGTTCTGTGGAGAAATTACTAGGATATCA  
ATCCCTA**AAGAT**TATGACACTGGTGCTTTTAAAGGGGATGCATACATGGACTTGAGTGATGCTAATGGCA  
TAAACAAAGCATTAGAATCAATCAATCAGAGTTAGGCGGTTATCCATTGATGGTTGAAGAAGCAAGGCC  
TCGGGATTCTCAGGGTGGCAGTGCTAGAGGTGGAAGAGGTGGTAG**AGATG**GTGGCGGCCGTGGTGAAGA  
GGTGGTAGAGACAGTGGTGGCCGGGGTGAAGAGGTGATCGTGGAAGAGGTAACCGCGGTGAAGGGGTG  
GCCGTGAACCCCTTTAAACAAAGTTTCAGTGACAGGAGGAACAGGGAC**CAAGACT**ACTTTCGC**AGATGA**  
CTAGTAGTT**CAAGAT**TTTTGCTGCCTAGATTTTGTCTAGCGAATATTATTTGTCGTATTTCTCTCTCT  
TTTTAACTCATCAGTTTTGGTAATTTTGATCATTTCACTAA**ATTCA**TATGTTTTGGAACAACTATGTAT  
ACTGAGTATCTGTAGCTCTCCAAACACTAGATTGAAGCTACAGTATTATTATGTCTTGTTTAAGTGTTG  
TAGCTTTCGATTCTATTTTCTTAATATCTTGTGACAGC

93 2554 22.4 (4.7) 14.9

**Mus musculus nucleolin (Ncl), transcript variant X1, mRNA NCBI Reference Sequence: XM\_006529238.4**

CCATGCTGGGGGGGAAAGTCTCGCGCGACTAGCGGGAGGTCTCGCGGTGCTTGCCCTCTGACTTAGGGGG**G**  
**ATGA**GAAAGAGCGGAGGCAGGTTTCCGGGAGGGCGATATCGAGGGTTCGGATGTAGCGGGCGGGAGGGGAC  
GGTGTGAGGAGAGATCGGAGGAGCTGAGAGCGGATAGGGGCGACGGCGTGGAAGAGAGGGCCAACTTAG  
GCGGCGAGCGGTCCCGGGGCCCCGCTCCCCGCGCACGTGCTCTGGTGCGCGGCCCGCCACGTGCTCTGC  
GGAGCCCCGCACGTGTGCGCGGACCCGGGGCAGTGGGGGAGTGTCTGTAGTACCCCGGAAAGGGGGACGG  
CAGCGTGGGGATGGATGGGTGGCCCGGCGATCTGCTGTCTCTGCCGGTGACCGGGATGGACACGTGGTGG  
ACCCCTGAGGTGGCGGCGTGGTGACTCCACGTGGTGGGGCTGGAAGCGAGAGAAAGTGGGAAGCAGTTGG  
GTTACGTGGTGTGCTTTAAGAGGCTGGCAAAACCCACGGTGAGGC**CAAGA**AAATGGCTCCTCCTCCAAA  
GGAGGTGGAAGAGGATAGTG**AAGATGAAG**AAATGTCAG**AAGATGAAGATGA**CAGCAGTGGAGAAGAGGAG  
GTTGTCATCCCTCAGAAAAAAGGCAAAAAGGCTACCACAACCCAGCAAAGAAGGTGGTTGTTTCACAAA  
CAAAAAGGCTGCAGTTCCACACCAGCTAAGAAAGCAGCTGTGACCCAGGCAAAAAGGCAGTAGCCAC  
ACCAGCTAAGAAAAACATTACACCAGCCAAAGTCATTCCAACACCGGGTAAGAAGGGAGCTGCACAAGCA  
AAAGCGTTGGTACCAACTCCTGGTAAAAAGGGAGCTGCCACTCCAGCTAAGGGGGCTAAGAACGGTAAGA  
ATGCC**CAAGA**AGGAAGACAGT**GATGAGGATGAAGATGAAG**AG**GATGAAGATGA**TAGC**GATGAGGATGAAGA**  
**TGATGA**GGAAGAG**GATGA**GTTTGAGCCACCAATAGTAAAAGGAGTGAAGCCAGCAAAAGCAGCTCCTGCT  
GCTCCTGCCTCAGAG**GATGAGG****AAGATGATGAGGATGAAGATGATGA**GG**AAGATGATGATGA**AGGAGG  
**AAGATGA**CTCTGAGGAAGAAGTTATGGAGATCACAAAGCCAAAGGAAAGAAACTCCTGCAAAAGTTGT  
TCCT**ATGAAAGC****CAAGA**GTGTGGCTGAGGAGGAG**GATGATGA**GGAAGAG**GATGAAGATGA**CGAG**GATGAG**  
**GATGA**TGAGGAAGAG**GATGACGAAGATGATGATGA**GGAAGAAGAGGAGGAAGAACCTGTTAAAGCAGCAC  
CTGGAACCGGAAGAAGG**AGATGAC**CAAGCAGAAAGAAGCCCCCTGAAGC**CAAGA**AACAGAAAGTAGAAGG  
CTCAGAACCAACTACACCT**TTCAAT**CTGTTTCATTGGAAACCTTAATCCAAACAAGTCTGTTA**ATGAAT**TA  
AAATTTGCCATCAGTGAACTTTTTGTCTAAAAATGATCTTGCTGTTGTGGATGTCAGAACTGTTACAAATA  
GGAAATTTGGTTATGTGGACTTTGAGTCTGCTGAAGACCTAGAAAAGGCCCTTGAGCTCACTGGTTTAAA  
AGTGTTTGGCA**ATGAA**ATTAACTAGAAAAACCAAAAGGAAGAGATAGTAAGAAAGTTCGAGCTG**CAAGA**  
ACACTTCTAGCCAAAACCTCTCT**TTCAAC**ATCACTGAG**GATGAAT**TAAAGGAAGTGTGTTGAAGACGCCA  
TGGAGATCAGATTAGTCAGCCAGGATGGGAAAAGTAAAGGGATTGCTTATAT**TGAAT**TAAAGTCTGAAGC  
TGATGCAGAGAAAAATTTGGAAGAAAAGCAGGGGGCAGAAATTGATGGACGATCTGTTTCACTCTACTAT  
ACTGGAGAGAAAGGTCAAAGG**CAAGAG**AGAACTGGAAGACCAGCACTTGGAGTGGTG**ATTCAA**AGACTT  
TGTTTTTAAGTAACCTTTCTACAGTGCAACAAAAGAACTCTTGAGGAAGTATTTGAGAAAGCAACTTT  
**TTCAA**AGTGCCCCAGAACCCACATGGCAAACCTAAAGGGTATGCATTTATAGAATTTGCTTCATTT**GAA**  
**GATG**CTAAAGAAGCTTTAAATTCCTGTAATAAAATGGAAATTGAGGGCAGAAACATCAGGCTGGAGTTGC  
AAGGATCCAATTCGAGAAGTCAACCATCCAAAACCTCTGTTTGTCAAAGGTCTGTCTGAGGATACCACTGA  
AGAGACCTTAAAAGAATCATTTTGAGGGCTCTGTTTCGTG**CAAGA**ATAGTCACTGATCGGGAAACTGGTTCT  
TCCAAAGGGTTTTGGTTTTGTAGACTTTAATAGTGAGG**AAGATG**CCAAAGCTGCCAAGGAGGCCATGG**AAG**  
**ATG**GAGAAATTGACGGAACAAAGTTACCTTGACTGGGCCAAACCTAAGGGTGAAGGTGGCTTTGGTGG  
TCGAGGTGGAGGCAGAGGAGGTTTCGGAGGCAGAGGTGGAGGCAGAGGTGGAAGAGGTGGATTGAGGA  
AGAGGCCGGGAGGCTTTGGAGGTAGAGGAGGCTTCCGAGGCGGCAGAGGAGGAGGGGGAGAC**TTCAAGC**  
CACAAGGAAGAAGACGAAGTT**TGAAT**AGTTCCCTCCATCCCATTCTTTCCCTCTTCATTTTAAAGAAAG  
GACTCTGGGGTTTTTACTCTGTACCTG**TTCAAT**GCAGAGCCTTCTAAGGACATTC**CAAGAC**AGTA**AAG**  
**AT**CCTAAACTCTGTTGCCAGACTTAATACTTCCCTAGAGGTTACATTTGGATTGTTGCTTAAGAGCTTGGC  
**AAGAC**CAACTCTGCCCAGTGGGAATTTTCAGTTGTGTTCCCTACTGCT**TTCAAGA**ATCCCAGCTACAAATG  
TGGAAATTGGTGGGGAACAGCTTCATCATGATTCTGATCTGG**AAGAT**TTAATTTGTATCTTAGAAGGGTG  
TGTAATTCTATTCCAGCATAATAAGAACAAACAGTACAGTGCAATCTGAAATGACCTGGACAAGGAATG  
GTACCCCATTTGGGTTGAAAA**ATTCA**CATAGCCAGGATGGTTGCACATGCCTTTAACCCAGCACTTGGGA  
GGGAGAGGCTGGTAGATCTGAGTTTGATCTGGTGTACAGAGAGTTCCAGAACAGCCAGGGCTGTTTATTA  
GAGAAAAAACCTGTCTTGAAAAAA**CAAGAAAA**AAACCTCACAGACAACCAAATACAGAGTTTATAGCC  
ACTGAGTACCAAGTCTCAGCAGCAAGCTGGGAGTGACGTAATCCAATCCCATGGGAGGCTAAAGCAGTCT  
ATGACT**TTCAAT**GCCAGTTGGGTCTGCAGAACTGAGTTGCTGGATAGTGAGGGATACTTAGAACTTTGTC  
TTGAAAAAA**CAAGAC**CTGTCAAATTTGAGAGAAGCTTTGGGAAACAAGGTTTGTAAGTTCCAACAG  
AGGGAACAGTGGCCTTTTTTACTTTAAAGGTTGTCAGAGGTCCAGTTTAACTAGGGATAATACAGTGGCCC

TTGGCCTGTGTACTTA**ATGAAT**TTTTTCAGTGATCT**TTCAAG**

**115** 3607 31.7 (5.6) **14.9 $\sigma$**

**Rhipicephalus sanguineus nucleolin (LOC119378082) mRNA NCBI Reference Sequence: XM\_037647325.2**

**ATGAAG**CTGAAGAAGGCT**CAAG**GGGCGACCTGGGGCAAAGCCATCTAAGGCCGGCAAGGAAAAGAAGTTGC**TCAAG**  
GCGAATGACAACGATGGAGAAGTGGAGTCGGACACGGAAGACTACCTCAAAGTTTCTGCAACTCCAAA**CAAGAAA**  
CCGAAGGTTCCAGCACCTGAGGCAGACTCTGAAGAGGACGACCTTGAAGTAGAC**GATGAAGATG**TC**GATGATGAG**  
**GATGATGA**TTTG**GATGAAG**ACAGCCTT**GATGATGA**GGAGCT**AGATGA**CAGTGAGGGCCTTAGTGGT**GAAGATGA**T  
**GATGAA**GTACCCCAATTGGTGGCAGCTGGAAAGGCCAAGGCGAAACAGAAAGCCTGCAGCAAAAGGAGCTTCTTTA  
GAAGAAGGGAGCGAGGAC**GATGACGATGATGATGAAGAGGATGA**TAGTGACTTG**GATGATGA**GGAG**GATGATGAA**  
GACGACGGCGGCACG**AAGATGAAGAAGATGA**GGAGGAGGAGGAGGACATGCTCG**TCAAGAT**AAAGAAAGTAGTC  
AAAGCGGAGCAGGCCAAGCGTAAAGCAGC**AGATGA**TGGGCCGACAGAGCAGACAAG**CAAGAA**AGCCAAGCAAGGA  
**GATGGC**ATTCCAAGGTCACTCCTCATGGATGT**AGATGAAT**ACGACAAGTTGTTCTGTATGTGGGCAATCTCCCA  
AAAGGCTGCACTATTGAGGAAGTGAAGGACCTGTCCCTGACATTGTCAAGTGTGCGAACGAATGTCAAATTGGGGC  
GAAAAGTTGTCATTTGCCTTTGTGGAG**TTCAA**AAGCGAGGCGGATGCTGATCGCAAC**TTCAAG**CGCCTACAAAAG  
GCCAGCCTGCGTGGCCACCCTTTGAGAGTGGGCTACCGTGGTGCCAAGCGTGCTGACCTGCCTTCTAACTGG**CAA**  
**GAGGTG**CAGAATGAGCTTTGTGTGTATGGCCTGCCCCAAGGGTTATCACAGCATAGAGTTGCCAGGCTCTTCCCC  
ACTGCCACCAACGTTTCCACCATGGCTTTCTACACTTTGGTGACATTGAGAGCAAGGATGCCTTGCTGGCTGCC  
C**TCAAGA**ACAACGCATGCCATTACATGGATGGGAATCCAC**TCAAG**TTCTCCTATCGTTTGAAGCCTGCTGGTGCA  
GG**CAAGA**AGAAGA**AAGAT**CAGAAGGAAGAAATTGAGAGAGAGGCAGCAGCAGACGGAGCTTGGAAAGCCATCCGAT  
TCCAAGCCTGGCAAAAACACTCCAGGAATGCCTGGAAGAAAAACAAAATGTAGTGCCAGGAAAGAAAGCTATTTGTG  
AAACAGACAGACAGTCCTGCACAGGCAAAGACGTCCAAGGCTAAATTTGATGCCAAGCGCAAAG**AGATGA**CAAAA  
GCTGCTCAACCTGCAAAGCAGGGAAAGG**TTCAA**AAGCAGTAAAA

**64** 1390 12,2 (3,49) **14.8 $\sigma$**

**Suncus etruscus nucleolin (NCL), mRNA NCBI Reference Sequence: XM\_049769307.1**

TTCGCCACTAGTCTCGAGCTCGCGCTGGTAGTCGAGCGTACGGCTCCGAGCTCCTCTTCTCCTTCCAGTCCCCAG  
CGGCCGCCATCGACTTCGCTCGCGGGGGTGTTCCTGTGAGGGCTCCGCTCGTCTCTGCGTCCGCCATTCCCAGCC  
GCCATTATGGTGAAGCTCGCGAAGGCCAGTAAAGGGGACAC**CAAGAAA**ATGGCTCCTCCCCCAAGGAGGTGGAA  
**AAGATAGT****GATGAG**GAAATGTCC**AAGATGAAGACGATGA**GAGCAGTGAAGAAGAGGAGGAGGAGGAGGAGATT  
ATCATCCCTCAGAAGAAAGG**CAAGA**AGGCTGTGGCAACTCCAGCAAAG**AAGATGA**TGGTTTCCCCAGCTAAAAAA  
GGTGCAATGGTCACACCAGCTAAAAAAGCAGTTGTTACCCCTGGGAAAAAAGGGGCAGCTCCTCCATCATC**CAAG**  
**AAAGCA**ATTACACCAGCCAAGGCTGTAGCGACACCTGG**CAAGA**AAGGTGGTGGCATGCCAGGTAAAGCACAAAGTA  
CCAGTATCTGGTAAGAAGGGGGCAGTCCCCCTGCCAAGGGCGCAAAAAATGG**CAAGA**ATGC**CAAGA**AGGAAGAC  
AGC**GATGAG**GAC**GATGAGGATGATGAGGATGAC**AGTGAAG**AAGATGA**GGAC**GATGA**GGAC**GATGATGAAT**TTGCG  
CCAGCAATGATAAAAGCAGCAGCTGCTGTTGCCATGCTTC**AGATGACGAAGATGACGATGATGAGGATGAAGAT**  
**GAAGACGAGGATGATGAGGATGAA**GAGGAATCTGAAGAAGAACCTATGGATACTGCCCCAGCGAAAGGAAAGAAA  
ACTCCCGCAAAAGCTGCTCCTGTGAAGGCT**TAAGA**ATATGGCTGAGGAG**GATGACGATGATGAGGATGAAGATGAT**  
**GAAAGAGGACGATGACGACGACGATGATGAGGATGAGGAGGATGATGA**GGAAGAGGACGAGGAGGAAGAGCCTGTC  
AAAGAAGCACCTGTAAAAAGAAAGAAGGAAATGGCCAAACAGAAAGCTGCTCCAGAAGC**CAAGA**AACAGAAAGTG  
GAAGGCA**ATGA**ACCAACTACATCT**TTCAAT**CTCTTTGTTGGGAACCTGAAC**TTCAA**CAAATCTGCCCCGAGTTA  
AAAACGGGTATCAGCGATCTTTTTGCTAAAAATGACCTTGCTGTTGT**AGATG**TCAGAATTGGTGTGTCTAGGAAG  
TTCGGTTATGTGGATTT**TGAAT**CTGCTGAAGACTTGAAAAAGCCTTGGAACCTACTGGTTTAAAAATGTTTGGC  
**AATGAA**ATTAAATTAGAAAAACCAAAGGGAAAGACAG**TAAGA**AAGAAAG**AGATGCAAGA**AACTTCTGGCTAAA  
AACCTGCCTTACAAAGTTACTCAG**GATGAAT**TAAAGGAAGTATTT**GATGA**TGCAATGGAGATCAGATTAGTCAGC  
AAGGATGGGAAGAGTAGAGGGATTGCTTACAT**TGAAT**TTAAAACAGAAGCTGATGCAGAGAAAAACATTTGAGGAG  
AAGCAGGGAACAGAGAT**AGATG**GACGATCCATTTCTTGTTACTACACTGGAGAGAAAGGTCAAAATCAGGACTAC  
AGAGGTGGAAAGAATAGCACCTGGAGTGG**TGAAT**CAAAAACCTCTGGTTTAAAGCAATCTTTCCTATAGTGCAACA  
GAAGAACTCTTCAGGAAGTATTTGAGAAAGCAACTTTAATCAAAGTGCCCCAAAACCAAATGGCAAATCTAAA  
GGGTATGCATTTATAGAATTTGCCTCATTT**GAAGATG**TAAGGAAGCTTTAA**ATTCA**TGTAATAAAAGGGAAATT  
GAGGGCAGAGCAATTAGGCTGGAGTTGCAAGGACCCAGGGGATCGCCTAATG**CAAGA**AGCCAACCATCCAAAACA  
TTGTTTGTCAAAGGTTTGTCTGAGGAAACCACGGAAGAGACGTTAAAGAGTCCTTTGATGGCTCTCTCCGTGCA

AGGATAGTCACTGACCGTGAGACCGGGTCTCCAAAGGGTTTGGTTTTGTAGATTTTCAGCAGTGAAG**AAGATGCC**  
AAAGCTGCCAAGGAGGCCATGG**AAGATG**GAGAAATTGATGGAAACAAAGTTATTTTGGACTGGGCCAAGCCTAAG  
GGTGATGGTGGTTTTCGGTGGTTCGTGGTGGAGGCCGTGGTGGCTTTGGCGGCAGAGGTGGTGGCAGAGGAGGTGCA  
GGCGGCTTTGGTGGCCGAGGTGCGGGAGGCTTTGGAGGACGAGGTGGCTTCCGAGGAGGCAGAGGAGGTGGAGAT  
CACAAGCCACAAGGGAAGAAGACGAAATTT**TGAAT**AGTTGATTATATCCCTCGAGTTTTTCTTCTTCCGTTTGAAA  
GGACTCTGAGGTTTTTTATTCTGTTACCTGATCAATGGCAGAGCCTTCTGAGGACATTC**CAAGA**CAGTATACAGTC  
CTGTGGTCTACTTGAAATCATATAGATAACAT**TTCAAG**GGAGAATACTGTTGGTTTTGACTGGATATTCGTATA  
AACTTTTTAAAG**AGATGAG**TGATAGAGCTAACCCCTATCTGTAAGTTTT**TGAAT**TTATATTGTTTCTTCCTATGTA  
CAAAACCATTTTTTCTACAAATAGTTGTTTGTGTTTGGGGGTGTAAAGGAAAGCAGAATGTTTTATGTT  
TTTTTGCTTCAGCTAATTTGGGACAAATTTAAAGTCCTGAACTCTGGTGCCA

95 2673 23,5 (4,84) 14.8σ

**Oenanthe melanoleuca nucleolin (NCL), mRNA NCBI Reference Sequence: XM\_056498994.1**

GTCGGGGCGGGGGCGGTGAGGGCGGGGTCTGACGCGGGGCAAGGAAAGGGGCGGAAGGGGCGCGCGCTC  
GCTCTTTCGTGTCACTGCCCCGGCCGGCCGAGCGGTCCCCGCCGCTCCCCGCCGCTCGCCCCGCGGCC  
GATCCCCCGCGTCGCCGCCTCGCCGGACGCGCCACCCCGCTCCCGACACAGCCCGGCCGCCGCCCTG  
CGCCGCCAGGCACCGCCGCCATCATGGT**GAGAT**TACGAAGACCCCGAAAAATC**AGATGAA**ACTGAAAAA  
AATGGCTCCTCCCCGAAAAAGTTTGAGGAAAGTGAGGAAGAGGAATCATCCGACCTAGAGGAAAGCAGC  
GGAGAAG**AGATGAT**GATCCCCAGAAGAAACCACAAAAAGTTGCTGTTACTCCAGC**CAAGA**AGGCTGCAA  
CTCCTGCAAAAAAGTTGCTACTCCTGCAAAAAAGGCAATTACACCTGCAAGAAGGTTGTGGCTACGCC  
ACAGCCCCAAAAAGGCTGTTACTCCAACACCTAAAAAGGCTGCTGTCCTAACCAAGGAGCAAAAAATGGA  
A**GAA**TGCTAAGAAGGAGGAGAGTGAAG**AAGATGATGATGATGATGAC****CAAGATGATGA**GGAGGAG**GATG**  
**ATGAAGAT**TCT**GATGAG**GAAGAGGAACCACCAATGCCTGTGAAGCCTGCAGCCAAAAAGCCTGCAGCAGT  
ACCAGCCAAAAAGCCTGCAGCTGTGCCAGCAAAGCAGGAATCTGAGGAGGAG**GATGAGGATGAAGAGGAT**  
**GATGAGGAGGATGATGAAGAGGAGGATGAGTCCGAAGATGAAGCCATGGACACAGCCCCGTGTTCCAGTGA**  
AGAAAACCACTCCAGCCAAGGCTGCACCACTGAAAGCCAAGGCAGCAGAATCTGGT**GATGAGGAAGATGA**  
GGAG**GATGACGATGAGGATGATGATGAAGAGGAGGAGGATGAAGAGGATGCCGAGGAGGAAAGTGAGGAT**  
**GAAAAACCTGTCAAG**GAAAGCACCTGGAAAGAGGAAGAAAGAAATGGCCAATAAAAGTGCAACAGAGCC**CA**  
**AGAAAAAGAAAACAGATG**GGCCACATCATCTTCTGTATATATGCCTCAAATTTGGTCTGCACCAAGA  
GTTT**GATGAA**CTGAAGACTGGCCTCAGAGAATTCTTTGGGAAGAAGAATATTGAAATTTT**AGATG**TCAGA  
ATTGGTTCTTCCAAGCGGTTTGGCTATGTGGACTTCTCATCTGCTGAGGATCTGGATAAAGCTCTCC**AGA**  
**TGAAT**GGAAAGAAGTTCAATGGGTTTGGAAATCAAACCTGGAAAAAGCAAAGAGCAAGGAAGCT**ATGAAGA**  
GAA**CAAGA**AAAGAGAG**AGATG**CCAGAACGCTGTTTTTGAAGAACCTGCCCTACCCTTAACCGAG**GATGAG**  
ATCAGGGAGGTGTTTGAAATGCCTTGGAAGTCCGGATAGT**GATGAAC**CAAGGAGGGGAACAGCAAGGGA  
TGGCCTATGT**TGAAT**TTAAAACAGAAGCTGAGGCAAAACAAAGCTCTGGAGGAGAAGCAGGGGCACAGAAAT  
TGAGGGTCGTGCTGTGGTCATTGATTTCACTGGCGAGAAGAGCCAG**CAAGA**ACATCATAAAGGAGAGTCA  
AAGACCCTAATTGTCAACAACCTCTCATATGCTGCTACAGAGGAGACTCTC**CAAGA**AGTGTTAAGAAAG  
CTTCTTCCAT**CAAG**GTGCCACAGAACAACCAGGGCAGGCCTAAAGGGTATGCATATGTAGATTTTGCCAC  
AGCTGAGGATGCCAAAGAGGCA**ATGAAT**TCCTATAACAATACAGAAATTGAAGGCAGAACATCAGACTG  
GA**ATT**CAGTTCACCATCATGGCAGAAAGGGAACACAAATGCACGAGGAGGAGGAGGAGGAGGAGGAT  
TCAGTCAGCAAAGCAAAACATTGTTTGTGTCAGAGGCCTTTCTGAGGACACCACAGAGGAGACGTTAAGAGA  
ATCGTTTGAAGG**TTCAATA**AGCG**CAAGA**ATAGTCACAGACAGAGACACTGGATCATCTAAAGGGTTTGGG  
TTTGTGGACTTCAGCTCTGCAG**AAGATG**CCAAAGCAGCTAAAGAAGCCATGG**AAGATG**GAGAGAT**AGATG**  
GAAACAAAGTGATCCTCGATTTTGCCAAGCCAAAGGG**TGAAT**TTCAAGCTGGCGGTGGATTTGGTGGTTCG  
TGGTGGCCGAGGAGGTGGCCGAGGAGGAAGAGGTGGATTTGGTGGCAGAGGTGGTGGCAGAGGTGGATTT  
GGAGGTAGAGGAGGAGGTGGCTTCCGAGGAGGCAGAGGAGGAGGTGGAGATCACAAGCCGCAAGGAAAGA  
AAATTAAGTTT**TGAAT**AAACTTCCCCTTTCCCTTTCCCTTCTTCTGCTCTC**CAAGA**CTATCTGAAAGGACTC  
CGGGGCTTTTATTCTCCTTTGATCTTGGCGGAGCCTTCGGAGGACATTC**CAAGA**AGCGAAGCAGTACTG  
TGAGCCACTTGG**AAGAT**AAAATTTTCA**TTCAAG**GAAGAGAGCAAGCCATTTTACTGCTTGCTCTGCT**TT**  
**CAAATGAAC**TTTTTAAACAAAGAGTGAT**AGATG**TGGGAATTTACCCCTTGCTGTGTAGTGTCT**TGAAT**  
TTATAATGTTTTACCCATGTACAAATTTTTTTTTTCTTATAAACTTCTGTAGCATTTTTGCTGTAAAA  
ATGCAGAATGTTTTATCATTTGTGCTGCAGCACCTGTCTTGACAGATTAAAGGACCTAAACTGGTTCG  
TGTTACTTCTGTGCCCTAAAGCCAGGCTGTGAGAAACAGGCTGCAGCATTCCCTCTTTAAGCTTAAGGT  
TATTTGTATCACAGCAGCAGCTTCTGTCCTGCTTTTCTCTAGCCGATGTCAGCTCCAGCAGTGTATGTG  
TGCTGTGTTAGAAGGAAGTAGGGGAG**AAGAT**CATGATGG**TCAAG**GTAATCTCTGTAACCACAATATATA  
TTTTTATTTTTTTTTTAACTGA**AAGATG**CTGTGATGGTGGCTTGCTAGCCAGTTGCTTTTCTACTTTTTAA  
CAAAGTAAATCAGATCTTGTACTAAG

96 3032 26.6 (5.16) 14.6σ

Camelus dromedarius breed African isolate Drom800 chromosome 5 nucleolin, mRNA NCBI Reference Sequence: XM\_010985648.2

CTGGGCAGGCTCAGTCTTTTCGCTCAGTCCCGAGCTCTAGCTGGCAGCTAAGCGTACGCGCTCTGGGATCTTCAG  
TACCAGCGGCCGCCATCGACGTTGCTTGGGTTCCCTTTGGGCTCATCTGCGCCACTCGCTCGCTATACACTCCGCT  
GTCATAAACCTCCATCATGGTAAAGCTCGCAAAGGCTGGTAAAAA**TCAAG**GTGACTC**CAAGA**AAATGGCTCCTCC  
CCCAAAGGAGGTAGAAG**AAGAT**AGCGAAGACGAGG**AGATGT**CAG**AAGATGAAGATGATGA**TAGCAGTGGGGAAGA  
GGTCATTATTCTCTCAGAAGAAAGGCCAAAAGGCTACCATAACTCCAGCAAAGAAGGTCATGGTTTCCCCAACAAA  
AAAGGTTGCAGTTGCCACACCGGCAAAGAAAGCAGTTGTTACCCCTGGCAAAGGAGCAGCGGCTACGGCAGCTAA  
GAAGACAGTTACACCACCTGCCAAAGCAGTAGCGACACCTGG**CAAGA**AGGGAGCCACACCAGGCAAAGCGTTGGT  
AGCAACCCCTGGTAAGAAGGGAGCAGCCGCCCCAGCCAAGGGAGCAAAGAATGGTAAAAATGCCAAAAAGGAAGA  
GAGT**GATGAGGAAGATGATGA**CGACAGTGAAGAGGAG**GATGAGGATGACGAAGATGAGGATGAAGATGAAT**TTGA  
GCCAGCAGT**GATGA**AAGCTGCTGCTGCTGCTCCTGCCTC**AGATGATGAGGATGATGAAGATGATGATGA**  
**AGACGATGATGAGGATGATGATGAGGATGAAGAGGATTC**TGAAGAAGAAGCTATGGAGACTGCACCACCCAAAGG  
AAAGAAAGCTCCAGCAAAGCTGTTTCTGTGAAGGC**CAAGAG**TGCTGCTGAG**GATGAAGATGAAGAGGATGACGA**  
**TGAGGACGAGGAGGATGAAGAGGATGACGACGAGGAGGATGATGAGGATGACGATGAGGAGGAGGAGGAGGACGA**  
**TGAGGAGGAGGAGGAGGAGGAGGAAGAGGAGGAAGAGCCTGTCAAAGAAGCACCTGGAAAAACGAAAGAAAGAAATGGC**  
CAAACAGAAAGCAGCTCCTGAAGC**CAAGA**AGCAGAAAGTGAAGGCACAGAACCAACCACAGCTTTAATCTCTTT  
GTTGGAAACCT**TGAAT**TTTCAGCAAATCTGCTCCT**TGAAT**TAAAAACGGGTATCAGTGACCTTTTTTGCTAAAAATGAT  
CTTGCTGTTGTGTCGATGTCAGAATTGGTGTGTCTAGGAAGTTTGGCTATGTGGATTTTGAGTCTGCTGAAGACCTG  
GAAAAAGCCTTGGAACCTACTGGTTTTAAAGTCTTTGGCA**ATGAA**ATTAACTAGAAAAACCAAAGGGAAAAAGAC  
AGTAAGAAGGATCG**AGATG**CGAGAACACTTTTGGCTAAAAATCTGCCTTATAAGTTACTCAG**GATGAAT**TAAAA  
GAAGTGTGTT**AAGATG**CTGTGGAGATCAGATTAATCAGCAAGGATGGAAAGAGTAAAGGGATTGCTTTTAT**TGAA**  
**TTTAAGACAGAAGCCGATGCAGAGAAAACCTTGGAAGAAAAGCAGGGAAACAGAGATAGATG**GACGATCCATTTCC  
CTGTACTATACTGGAGAGAAAGG**TCAAGGTCAAGA**CCCTAGAGGTGGAAAGAATAGCACTTGAGTGG**TGAAT**CA  
AAAACCTCTGGTTTTTAAGCAACCTTTTCCTTCAGTGCAACAGAAAGAACTCTTCAGGAAGTATTTGAGAAGGCAACT  
TTTATCAAAGTGCCCCAGAGCCAAAATGGCAAATCTAAAGGGTATGCGTTTATAGAATTTGCTTCCTTTG**AAGAT**  
**GCTAAAGAAGCTTTAAATTCTTGTAATAAAAGGGAAATTGAGGGCAGAGCAATCAGGCTGGAGCTGCAAGGACCC**  
AGGGGATCACCTAATG**CAAGA**AGCCAGCCATCCAAAACCTCTGTTTGTCAAAGGTCTGTCTGAGGATACCAAGAA  
GAGACATTAAGAGAGTCGTTTGAGGGCTGTGTCGTGCAAGGATAGTCACTGACCGGGAACCGGGTCTCCAAA  
GGGTTTTGGTTTTTATAGACT**TTCAAC**AGCGAGG**AAGATG**CCAAAGCTGCCATGGAGGCCATG**GAAGATG**TGAAATT  
GATGGAACAAAGTTACTTTGGACTGGGCCAAGCCTAAGGGTGAAGGTGGCTTTGGTGGCCGAGGAGGAGGCAGA  
GGTGGCTTTGGAGGCCGAGGTGGTGGCAGAGGTGGCCGAGGTGGATTTGGTGGCAGAGGCCGGGGAGGCTTTGGA  
GGGCGAGGAGGCTTCCGAGGAGGCAGAGGAGGAGGAGGAGACCACAAGCCACAAGGAAAAGAGCGAAGTT**TGAA**  
**TAGTTTTCTTCTATCCCTGTCTTTCCCTCTTCCATTTGAAAGAAAGGACTCTGGGGTTTCTACTCTGTTACCAATG**  
ACAGAGCCTTCTGAGGACATTCCAAGGCAGTATACAGCCCTGTGGTCTACTCGGAAATCCATATAGATAACATTT  
CACGGGAGATAACCCTGTTGGTTTTGACTGGAT**ATTCA**GATAAACTTTTTAAAG**AGATGA**GTGATAGAGCTAACC  
CTTATCTGTAAGTTTT**TGAAT**TTATATTGTTTTTTCCCATGTACAAAACCATTTTTTTCT**ATGAA**GTTTTTTGTT  
TGTTTTTTTTTGCGTTGGGGGGTGTAAGGAAAGCAGAATGTTTTATCATGATTTTGTCTCAGCAACTTTGGGAC  
AAATTAAGTCTCTAACTCTGGT

95 2720 23.9 (4.9) 14.5σ

Harpia harpyja nucleolin (NCL), mRNA NCBI Reference Sequence: XM\_052804401.1

GAGGGGGCGTGGCGCGGCGAGGGCTAGGCAAGCGAGCGGAAGGGGGCCGCGCTCGCTCTTTTCGTTTCAGTCCCC  
GGTCCGGGTGCGCAGCGCCTCGCCGCCGCTCCCGCCGACCGCCCGGGGCCGCTCCGCTCCTCGCCTCCGCCCCG  
CCGGACGTGCCCACCCCTCTCCCGAGACAGCTCGGCCGCCGCCCTGCGCCGCCAGGCACCGCCGCCATCATGGT  
**GAAGAT**CGC**CAAGACTCCCAAGA**ATCAGATCAAACAGAAAAAATGGCTCCTCCCCCAAAAAGGTCGAGGAAAAG  
CGAGGAAGAAGAGTCCTCTGAGCTAGAGGAAAGCAGCGGAGAAG**AGATGA**TCCCTCAGAAGAAACAGAAAGCAGC  
AGTGACACCAGC**CAAGA**AGGCAGCTACTCCTGCAAAGAAGGCCGCTATTCTGCAAAAAAGGCAATTACACCTGC  
TAAGAAGACTGTGGCTACTCCAGCTAAAAAGGCTGTTGCTCCATCACCTAAAAAGGCTGCTGTCTTAACCAAAGG  
AGCGAAAAATGGGAAGAATGC**CAAGA**AGGAAGAGAGTGAGGAGGAG**GATGAAGATGA**TGAGG**AAGATGA**GGAGGA  
GG**AAGATGA**GGAGGAGGAGGAGGAAGAAGAGGAAG**AAGAT**TCT**GATGA**GGAAGAGGAACCAGCAATGCCTGTGAA  
GCCTGCAGCCAAAAGCCTGCAGCAGTACCAGCCAAAAGCCTGCAGTTGTGCCAGCAAAG**CAAGA**ATCTGAAGA  
GGAGGAG**GATGATGATGAGGAGGATGATGAGGAAGAGATGATGAAT**CTG**AAGATGAA**GCCATGGACACAACCCC  
TGTTTCAGGTGAAGAAACCTACTCCAGTAAAGGCCACACCAGTGAAAGCCAAGGCAGACTCTG**AAGATGA**GG**AAGA**  
**TGAGGAGGATGA**TGAGGAGGAG**GATGATGATGAAGAGGAGGAGGATGAAGAGGATGCCGAAGAGGAAAAGTGAGGA**  
**TGAAAAACCTGTCAAG**GAAGCACCTGGAAAGAGGAAGAAAGAAATGGCCAACAAAAGTGACACCAGAGGC**CAAGA**A  
AAAGAAAAGTACGGGGCCACTTCAGCTTTCTCCCTCTTTGTGGGAAATTTGGTCCCCACCAAGGAGT**ATGAAGA**  
ACTGAAGACTGGCATCAAAGAATTCTTTGGGAAGAAGAATATCGAAGTTTT**AGATG**TCAGAATTGGTGCTTCCAA  
GCGATTCCGGCTATGTAGACTTTTCATCTGCTG**AAGAT**CTGGATAAAGCTCTCCAAC**TGAAT**GGAAAGAAGTTAAT

GGGTTTGGAAATCAAACCTGGAAAAAGCAAAGAGCAAGGAAACGATGAAAGAAAAATAAGAAAGAGAGAGATGCTAG  
AACATTGTTTTGTGAAGAATCTGCCCTACCGCTTAAGTGAAGATGAAATGAGAGAGGTGTTTGAAAAATGCACTAGA  
AATCCGAATAGTAATGAAACAAGGAGGGGAACAGCAAAGGGATGGCCTATATTGAATTTAAAAACAGAAGCTGAGGC  
AAACAAAGCTCTGGAGGAGAAGCAGGGCACAGAGATTGATGGTCGTGCCATGGTCATTGACTTCACTGGTGAGAA  
GAGCCATCAAGAACATCAGAAAGGAGGTGGAGAGAGGGAGTCAAAGACCCTAATTGTCAACAACCTCTCATATGC  
TGCTTCAGAAGAGACTCTCACAAGACTGTTCAAGAAAGCTTCTTCCATCAAGATGCCACAGACCAACCAGGGCAG  
GCCTAAAGGGTATGCGTTTGTAGAATTTCCACAACTGAGGATGCCAAAGAGGCATTGAATTCCTGTAAACAACAC  
AGAGATTGAAGGCAGAGCAATCAGATTGGAATTCAGTTTACCAGGCATGGCAGAAAGGGAGCATGAACGCAAGAGG  
AGGATTTAATCAACAAAGCAAAACGTTGTTTGTGTCAGAGGCCTTTCTGAGGACACCACAGAGGAGACGCTAAGAGA  
ATCATTTGAAGGCTCTATAAGTGCTAGAATAGTCACAGACAGAGACACTGGATCATCTAAAGGGTTTGGGTTTGT  
GGACTTCAGCTCCCCAGAAGATGCCAAAGCAGCTAAAGAAGCCATGGAGGATGGAGAGATAGATGAAACAAAGT  
GATCCTTGATTTTGCCAAGCCAAAGGGTGAATTTAGCGTGGCGGTGGATTTGGTGGTCGTGGCGGCAGAGGAGG  
AGGCCGAGGAGGAAGAGGTGGATTTGGTGGCAGAGGTGGTGGCAGAGGATTTGGAGGTAGAGGAGGTGGCTTCCG  
AGGAGGCAGAGGAGGAGGTGGAGATCACAAGCCGCAAGGGAAGAAGATAAAGTTTGAATAAACTTCCCCTTTTCT  
TTCCCTTCTCCTGCTCTCTGAGACTATCTGAAAGGACTCCGGGGGTTTTTATTCTCCTTTGATCTTGGCGGAGCC  
TTCGAGGACATTCAGATGCAAAGCAGTACTGTGAGCCACTTGGAGATACAATTTTCATTTCAAGGAAGAGA  
GAGCAAGCCATTTTACTGCTTGCCTATTCAAATGAACTTTTTAAAAAACGAGCGATAGATGTGGGAATTTACCC  
CTTGTCTGTGAGTTGTCTGAATTTATAATGTTTTTACCCATGTACAAAAATATTTTTTTTTTCTATAACTTC  
TGTAGCATTTTTGCTGTAAAAATGCAGAATGTTTTATCATTTGTGCTTCAGCACCCCTGTCTTGACAGATTAAAG  
GACCTAAACTGGTTTCGTGTTA

94 2717 23,88 (4,89) 14.3σ

**Elephas maximus indicus nucleolin (NCL), mRNA** NCBI Reference Sequence: XM\_04988444.1

TTTCCAGAGGCGATTACTGGGTAGGCTCCGTCTTTTGCCTCAGTCTCGAGCCCTAGCTGGCAGCGAAGCGTGCGC  
GCTCCAGGCTCTTCAGCACTCGCGCCGCCATCGACGTCGCTTGGGTTCTTCTAGGCTCATCTGCGCCACTCACT  
CTCCACACACTCCGTGCTCACAAGCCGCCATCATGGTGAAGCTCGCGAAGGCCGGTAAAAATCAAGGTGACCCCA  
AGAAAATGGCTCCTCCCCCTAAGGAGGTAGAAGAAGATAGTGAGGATGAGGAAATGTCAGAAGATGAAGAAGAAG  
AAGAAGAAGACAGCAGTGGAGAAGAGGTCATTCCTCAGAAAAAAGGCAAGAAGAATCCCGCGGTACCGTCCA  
AGAAGGTGGTGGTTTCCCCAACAAAAAGGTGGTAGCTGCCCCACCGGCACAAGAAGCAGCTGTCAACCCCTGGCA  
AAAAAGCAGCAGCCACGCCGGCACAAGAAGACAGTTACACCAGCCAAAGCAGTAGCGACACCTGGCAAGAGGAG  
CCACCCCGGGCAAAGCAGCAGTGGCCACCCCTGGTAAGAAGGGAGCTGCCACTCCAGCCAAGGGGGCAAAGAATG  
GCAAGAATGCCAAGAAGGATGAGAGCGATGATGAGGAAGATGATGAAGACAGTGAGGAAGATGATGAGGATGAAG  
AAGAATTTGAGCCAGCCATGATGAAGCAGCAGCGGTTGCCCTGCCTCCGATGATGAGGATGATGAAGATGAGG  
AGGAGGAGGACGATGAGGAGGATGATGATGAGGAGGATGAAGACGACGACTCTGAAGAAGAGGCCATGGAGACTA  
CACCAGCAAAGGAAAGAAAGCTCCTACAAAAGGCGCTGTGAAAGCACAAGTGTGGCTGAGGACGAAGATGAAG  
AGGATGACGATGACGAGGAGGAGGAGGATGAGGAAGAGGATGATGATGAAGATGAAGAGGAAGAGGAGGAGGATG  
AGGAAGATGAAGAGGAGGAAGAACCTGTCAAAGAAGTACCTGGCAAACGAAAGAAGGAAATGTCCAAACAGAAAG  
CTGCCCCTGAAGCCACAAGAACAGAAAGTGAAGCCGTAGAACCAACTTCAGCATTTCAAATCTCTTTGTTGGAAC  
TGAAGTGAACAAATCTGCTCCTGAATTTAAAACTGGCCTAAGTGACCTTTTTGCTAAAAATGATCTTGCTGTTG  
TGGATGTCAGAATTGGTATGTCTAGGAAGTTGGCTATGTGGATTTTGAATCTGCTGAAGACCTGGAAAAAGCCT  
TGGAATTTACTGGCTTAAAGTCTTTGGCAATGAATTAAGTAGAGAGACCAAAGGGAAAAAGACAGTAAGAAG  
ATCGAGATGCCAGAACACTCTTGGCCAAAAATTTGCCTTACAAAGTCACTCAGGAAGAATTTAAAGAGTGTGTTG  
AAGCTGATGCCGAGAAAACTTTTGAAGAAAAGCAGGGAACAGAGATCGAGGGCGGTCAATATCGCTATACTACA  
CTGGGGAGAAGGGTCAAATCAGGACTACAGAGGTGAAAGACTAGCACTTGAGCGGTGAATCCAAACTCTGG  
TCTTAAGCAACCTCTCCTACAACGCGACAGAAGAACTCTTCAGGAAGTATTTGAGAAGGCAACAGCTATCAAGG  
TGCCCCAGAACCAAAACGGCAAATCTAAAGGTATGCATTTATAGAATTTGCTTCATTTGAAGATGCTAAAGAAG  
CTTTAAATTCTTGTAATAAAAGAGAAATCGAGGGCAGAGCAATCAGGTTGGAGTTGCAAGGATCCAGGGGATCAC  
CTAATGCAAGAAGCCAGCCGTCCAAAACCTGTGTTGTCAAAGGTCTCTCTGAGGACACCCTGAGGAGACATTGA  
AGGAGTCGTTTGACGGCTCTGTTTCGTGCCAGGATAGTCACCGACCGGGAACTGGCTCTTCCAAAGGGTTTGGTT  
TTGTAGACTTCAACAGTGAGGAAGATGCTAAAGCTGCCAAGGAGGCCATGGAAGATGTGAAATAGATGCAACA  
AAGTTACCTTGGACTGGGCCAAGCCTAAGGGCGAAGGTGGCTTTGGGGGTCGAGGCGGAGGCAGGGGAGGATTTG  
GAGGCCGGGTGGCCACAGCAGAGGAGGCCGAGGTGGATTCGGCGGCAGAGGCCGGGGAGGCTTTGGAGGGCGAG

GAGGTTTCCGAGGCGGCAGAGGAGGAGGAGGAGACCACAAGCCACAAGGAAAGAAGACGAAGTTTGAGTAGTTCT  
TCTGTCCCTCTGTTTTTCTTTTCCATTTTGAAAGAAAGGACTCTGGGGTTTTTACTCTGTTACCTGATCATGAC  
AGAGCCTTCTGAGGACATTCCGAGACAGTAGACAGCCCTGTGGTCTACTGGGAAATCCGTACAGATAACAT**TTCA**  
**AGGGAGATG**CCCTGTTGGTTTTGACTGGAT**ATTCA**TATAAACTTTTTTAAAG**AGATGA**GTGATAGAGCTAACCCCT  
TATCTGTAAGTTT**TGAAT**TTATATTAAGTTTCATCCCATGTACAAAACCGTTTTTTTCTACAGATAGTTTTTTG  
CGTTGGGGGTGTAAAGGAAAGCAGAATGTTTTATCATGATTTTTGCTTCAGCGACTTTGGGACAAATTAAAAAG  
TCCTAAACTCTG

93 2708 23,8 (4,87) 14.2σ

**Serinus canaria nucleolin (NCL), mRNA NCBI Reference Sequence: XM\_050978052.1**

TCCGCGCTCCTCGCCGCTCCCGCCGTCGCCCCGCGCCCCGATCCCCCGCGCCGCCGCCGCCGCGGACGCGCCC  
GCCCCGCTCCTGACACAGCTCGGCCACCGCCCCCTGCGCCGCCAGGCACCGCCGCCATCATGGTG**AAGAT**TAC**CAA**  
**G**ACCCCGAAGAATCAGATAAAACAGAAAAAATGGCTCCTCCCCGAAAAAGTTCGAGGAAAGTGAGGAAGAGGA  
GTCCTCTGACCTAGAGGAGAGCAGCGGAGAAG**AGATGA**TCCCCCAGAAGAAACCACAAAAAGTTGCTGTTACCCC  
AGC**CAAGA**AGGCTGCAACTCCTGCAAAAAAATTTGCTACTCCGGCGAAAAAGGCAGTTACACCTGCAAAAGAGGT  
TGTGGCTACTCCACAGCCCAAAAGGCTGTTGCTCCAACCTCTAAAAAGGTTGCTGTCCTAACCAAAAGGAGCAAA  
AAATGGAAAGAATG**CAAGA**AGGAGGAAAGTGAAGAAG**AAGATGATGAAGATGATGAC****AAGATGATGA**GGAGGA  
**GATGAGGATGAAGAAGAT**TCT**GATGA**GGAAGAGGAACCCCCAATGCCTGTGAAACCTGCAGCCAAAAAGCCTGC  
AGCAGTACCAGCCAAAAAGCCTGCAGCTGTGCCAGCAAAG**CAAGA**ATCTGAGGAGGAG**GATGA****GATGA**GAGGA  
**TGAGGAGGACGATGA**GAAGAG**GATGA**GTCT**GAAGATGA**AGCCATGGACACAGCCCCTGTTCCAGTGAAGAAAAAC  
CACTCCAGCCAAGGCTACACCAGTGAAAGCCAAGGCAGTAGAATCTG**AAGATGA**GG**AAGATGA**GGAGGAG**GATGA**  
**CGATGAGGATGATGATGA**AGAGGAGGAG**GATGA**AGAGGATGCCGAGGAGGAAAGTG**AAGATGA**AAACCTGT**CAA**  
**GGA**AGCCCCTGGAAAGAGGAAGAAAGAAATGACCAATAAAAGTGCACCAGAGCC**CAAGAAAAAGAAAA****AGATG**G  
GCCTGCATCAGCTTTCTCTGTATTTGTTGGAAATTTGGTCTGCAGCAAGGACTTTGAGGAGCTGAAGACTGGCCT  
CCGAGAATTCTTTGGGAAGAAGAATATTGAAGTTGT**AGATG**TCAGAATCGGTGCTTCCAAGCGGTTCCGGCTATGT  
GGACTTCTCATCTGCTGAGGATCTGGATAAAGCTCTCC**AGATGAAT**GGAAAGAAGTTAATGGGTTTGGAAAGTCAA  
ACTGGAAAAAGCAAAGAGCAAGGAAGCT**ATGAA**AGAAGA**CAAGA**AGAGAG**AGATG**CCAGAACACTGTTTTTGAA  
GAACCTGCCCTACCGCATAACTGAGGATAACATCAGGGAGGTGTTTGAAAACGCATTGGAAAGTCCGGATAGT**GAT**  
**GAA**CAAGGACGGGAGCAGCAAAGGGATGGCCTACAT**TGAAT**TTAAAACAGAAGCTGAGGCAAACAAAGCTCTGGA  
GGAAAAGCAGGGCACAGAAATCGAGGGTCGTGCTGTGGTCATTGACTTCACTGGTGAGAAGAGCCAG**CAAGA**ACA  
TCAGAAAGGTGAGTCGAAGACCCTGATTGTCAACAACCTTTCATATTCTGCTACAGAAGTGACTC**TTCAAGA**AGT  
GTTTAAGAAAGCTTCTTCCA**TCAAG**GTGCCACAGAACAACCAGGGCAGGCCTAAAGGGTATGCATTTGTAGATTT  
TGCCACAACCTGAGGATGCCAGAGAGGCATTAAATTCTTATAACAACACAGAGATTGAAGGCAGAACAATCAGACT  
GGA**ATTCA**GTGCGCAGAAAGGGAACACGAATGCACGAGGCGGTGGAGG**ATTCA**GTACAGCAAAGCAAAACATTGTT  
TGTCAGAGGCCTTTCTGAGGACACCACAGAGGAGACATTAAGAGAATCGTTTGAAGGCTCAATAAGCG**CAAGA**AT  
AGTCACAGACAGAGACACTGGATCATCTAAAGGGTTTGGGTTTGTGGATTTCAGCTCTGCAG**AAGATG**CCAAAGC  
AGCTAAGGAAGCCATGG**AAGATG**GAGAGAT**AGATG**GAAACAAAGTGACCCTTGATTTTGCCAAGCCAAAGGGTGA  
CTTCCAGCGTGGTGGTGGATTTGGTGGTCGTGGAGGCAGAGGAGGTGGCCGAGGAGGAAGAGGTGGATTTGGTGG  
CAGAGGTGGTGGCAGAGGTGGATTTGGAGGTAGAGGAGGAGGTGGCTTCCGAGGAGGCAGAGGTGGAGGTGGAGA  
TCACAAGCCGCAAGGGAAG**AAGATCAAG**TT**TGAAT**AAAACCTCCCCCTTTCCCTTTTCCCTTTTCTGCTCTCCGAGAC  
TATCTGAAAGGACTCCGGGGGTTTTTATTCTCCTTTGATCTTTGGCGGAGCCTTCGGAGGACATTC**CAAGA**AGCGA  
AGCAGTACTGTGAGCCACTTGG**AAGATA**ACATTTTCAT**TTCAAG**GAAGAGAGAGCAAGCCATTTTGACTGCTTGC  
CTG**TTCAA**AGGAACTTTTTAAACAAAGAGTGAT**AGATG**TGGGAATTTACCCCTTGCTGTGAGTTGTCT**TGAAT**  
TTATAATGTTTTACCCATGTACAAAAATTTTTTTTTTCTATAAACTTCTGTAGCATTTTTGCTGTAAAAATGCA  
GAATGTTTTATCATTTGTGCTTTAGCACCTGTCTTGGACAGATTAAAGGACCTAAACTGGTTTCGTGTTA

91 2616 23 (4,79) 14.2σ

**Prionailurus viverrinus nucleolin (LOC125173306) mRNA NCBI Reference Sequence: XM\_047872263.1**

ACTGGGCAGGCTCAGTCTTTTCGCCTCAGTCTCGAGCTCTAGCTGGCAGCCAAGCATACGTGCTCCGGGATATTCT  
GTACCAGCGGCCGCCATCGCCGTCGCTTGGGTTTCTCTGGACTCGTCTGCGCCACTCGCCCGCCACACACTCCGC  
CGGCCTACGCCGCCATCATGGTGAAGCTCGCAAAGCTGGTAAAAATCAAAGTGACCC**CAAGA**AAATGGCTCCTC  
CCCCTAAGGAGGTAGAAGAAGACAGTG**AAGATGA**GGAAATGTCAG**AAGATGAAGATGA**TGATAGCAGTGGAGAAG



AGGTTATCATTCTCAGAAAAAAGG**CAAGA**AGGCTGCCGCAACTCCAGCAAAGAAGGTGATGGTTTCCCCAACAA  
AAAAGGTTGCAGTCGCCACACCAGC**CAAGA**AAGCAGTTGTCAACCCTGGCAAAAAGGCAGCAGCCACACCAGCCA  
AAAAAACCGTTGCACCAGCCAAAGCAGTAGCAACACCTGG**CAAGA**AGGGAGCCACCCCGGGCAAGGCATTGGTAG  
CAACTCCTGGTAAGAAAGGAGCAGCCACCCAGCCAAGGGAGCAAAGAATGGGAAGAATGC**CAAGA**AGGAAGACA  
GT**GATGAGGAAGATGAC**GAGGACAGTGACGAGGAG**GATGAGGA**AGAGGAG**GATGAA**GAGGAG**GATGAAT**TCGAGC  
CGGCAGT**GATGAA**AGCCGCCGCTGCTGCCCCCTGCCTC**AGATGAT**GAGGACGACGACGACGAGGAGG**AAGATGAT**G  
AG**GATGAGGA**AGAG**GATGAGGATGAGGATGACGATGA**CTCTGAAGAAGAAGCTATGGAGACCACACCAGCCAAAG  
GAAAGAAAATCCCTGCAAAAGCCCTTCTGTGAAGGC**CAAGA**GTGCAGCTG**AAGATGAAGATGA**GGAGGAG**GATG**  
**ATGAGGATGAAGATGAGGAGGATGAT**GAGGAAGAGGAG**GATGATGATGA**GGAAGAAGAGGAGGAGGAGGAGGAGG  
AAGAAGAAGAAGAAGAAGAGCCTGTTAAAGAAGCACCTGGAAAGCGAAAGAAGGAAATGGCCAAACAGAAAGCGG  
CTCCTGAAGC**CAAGA**AACAGAAAGTAGAAGGTACAGAACCAACTACATC**ATTCAAT**CTTTTTTGTGGAAACCT**TGA**  
**ATTT**CAGCAAATCTGCTCCT**TGAAT**TAAAAACAGGCATTAGTGATATTTTTGCTAAAAATGATCTTGCTGTTGTGG  
ATGTCAGAATTGGTGTGTCTAGGAAGTTTGGCTATGTGGATTT**TGAAT**CTGCTG**AAGAT**CTGGAAAAAGCTCTGG  
AACTCACTGGTTTAAAAGTCTTTGGCA**ATGAA**ATTAACTAGAAAAACCAAAGGGAAAAAGACAGTAAGA**AAGAT**C  
GAGACG**CAAGA**ACACTTTTGGCTAAAAATCTGCCTTACAAAGTTACTCAG**GATGAAT**TAAAAAGAAGTATTT**GAA**  
**ATGCT**GTGGAAATCAGATTGGTCAGCAAGGATGGAAAGAGTAAAGGGATTGCTTATAT**TGAAT**TTAAGACAGAAG  
CTGATGCAGAAAAAACCTTGAAGAAAAGCAGGGAACAGAGAT**AGATG**GGCGATCTATTTCCCTGTACTATACTG  
GAGAGAAGGGTCAAAAT**CAAGACT**ATAGAGGTGGAAAGAATAGCACTTGGAGTGG**TGAAT**CAAAACTCTGGTTT  
TAAGCAATCTCTCTACAATGCAACAGAAGAACTC**TTCAAGA**AGTATTTGAGAAGGCGACTTTTATTAAAGTGC  
CCCAGAACCAAAATGGCAAATCTAAAGGGTATGCATTTATAGAATTTGCTTCATTT**AAGATG**CTAAAGAAGCTT  
TAAATTCCTGTAATAAAAGGGAAATTGAGGGCAGAGCAATCAGGCTGGAGTTGCAAGGACCCAGGGGATCACCTA  
ATG**CAAGA**AGCCAGCCGTCCAAACTTTGTTTGTCAAAGGTCTGTCTGAGGATACCACAGAAGAAACATTAAAGG  
AATCATTTCGACGGCTCTGTTTCGGGCAAGGATAGTCACTGACCGGGGAGACTGGGTCTCCAAAGGGTTTGGTTTTG  
TAGACT**TTCAAC**AGTGAGGA**AAGATG**CCAAAGCTGCCAAGGAGGCCATGG**AAGATG**GTGAAATTGATGGAACAAAG  
TTACTTTGGACTGGGCCAAACCGAAGGGTGAAGGTGGCTTTGGAGGTGCGGGTGGAGGCAGAGGTGGCTTTGGAG  
GCCGAGGTGGTGGCAGAGGAGGCCGAGGTGGATTTGGTGGCAGAGGCCGGGGAGGCTTTGGAGGGCGAGGAGGCT  
TCCGAGGAGGCAGAGGAGGAGGGGGAGACCACAAGCCACAAGGAAAGAAGACGAAGTT**TGAAT**AGTTTCTTCCAT  
CCCTCTGTCTTTACCCTCTTCTGTTTGAAGAAAAGGACTCTGGGGTTTTTACTCTGTTACCTGATCAATGACAG  
AGCCTTCTGAGGACATTCCGAGACAGTATACAGTCTGTGGTCTACTTGAAGTTTCGTATAGATAACAT**TTCAAG**  
GGAGATACCCTGTTGGTTTTGACTGGAT**ATTCA**TATAAACTTTTTTAAAG**AGATGAG**TGATAGAGCTAATCCTTAT  
CTGTAAGTTTT**TGAAT**TTATATTGTTTCTTCCCATGTACAAAACATTTTTTCTACGAATAGTTTTGTTTTGT  
TTTTTTCGCTTGGGGGGGTGTAAAGGAAAGCAGAATGTTTTATCATGATTTTTGCTTCAGCAACTTTGGGACAAA  
TTAAAGTCCTAAACTCTG

92 2715 23,87 (4,88) 14σ

**Lynx rufus nucleolin (LOC124515288), mRNA NCBI Reference Sequence: XM\_047084058.1**

CTTTTCGCTCAGTCTCGAGCTCTAGCTGGCAGCCAAGCATACTGCTCCGGGATATTCTGTACCAGCGGCCGCCATC  
GCCGTTGCTTGGGTTCTCTGGACTCGTCTGCGCCACTCGCCCGCCACACACTCCGCCGGCATAACGCCCATCATG  
GTGAAGCTCGCAAAAGCTGGTAAAAATCAAAGTGACCC**CAAGA**AAATGGCTCCTCCCCCTAAGGAGGTAGAAGAAGA  
CAGTG**AAGATGAGGA**ATGT**CAGAAGATGAAGATGA**TGATAGCAGTGGAGAAGAGGTTATCATTCCTCAGAAAAAAG  
**GCAAGA**AGGCTGCCGCAACTCCAGCAAAGAAGGTGATGGTTTCCCCAACAAAAAAGGTTGCAGTCGCCACACCAGCC  
**AAGA**AAGCAGTTGCCACCCCTGGCAAAAAGGCAGCAGCCACACCAGCCAAAAAAGCCGTTGCACCAGCCAAAGCAGT  
AGCAACACCTGG**CAAGA**AGGGAGCCACCCCGGGCAAGGCATTGGTAGCAACTCCTGGTAAGAAAGGAGCAGCCACCC  
CAGCCAAGGGAGCAAAGAATGGGAAGAATGC**CAAGA**AGGAAGACAGT**GATGAGGAAGATGAC**GAGGACAGTGAAGAG  
GAG**GATGAGGA**AGAGGAG**GATGAA**GAGGAG**GATGAG**TTTCGAGCCGGCAGT**GATGAA**AGCCGCCGCTGCTGCCCCCTGC  
CTC**AGATGAT**GAGGACGACGACGACGAGGAGG**AAGATGATGAGGATGA**GGAAGAG**GATGAGGATGAGGATGACGATG**  
**ACTCTGAAGAAGAAGCTATGGAGACCACACCAGCCAAAGGAAAGAAAATCCCTGCAAAAGCCGTTCTGTGAAGGCC**  
**AAGAGTGCAGCTGAAGATGAAGATGAGGAGGAGGATGATGAGGATGAAGATGAGGAGGATGATGAGGAAGAGGAGGA**  
**TGATGATGAGGAAGAAGAGGAGGAGGAGGAGGAAGAAGAAGAAGAAGAAGAGCCTGTTAAAGAAGCACCTGGAA**  
AGCGAAAGAAGGAAATGGCCAAACAGAAAGCGCTCCTGAAGC**CAAGA**AACAGAAAGTAGAAGGTACAGAACCAACT  
ACATC**ATTCAAT**CTTTTTTGTGGAAACCT**TGAAT**TTACAGCAAATCTGCTCCT**TGAAT**TAAAAACAGGCATTAGTGACAT  
TTTTTGCTAAAAATGATCTTGCTGTTGTGGATGTCAGAATTGGTGTGTCTAGGAAGTTTGGCTATGTGGATTT**TGAAT**  
CTGCTG**AAGAT**CTGGAAAAAGCTTTGGAACCTACTGGTTTAAAGTCTTTGGCA**ATGAA**ATTAACTAGAAAAACCA

AAGGGAAAAGACAGTAAGA**AAGAT**CGAGACG**CAAGA**ACACTTTTGGCTAAAAATCTGCCTTACAAAGTTACTCAG**GA**  
**TGAAT**TAAAAGAAGTATTT**GAGATG**CTGTGGAAATCAGATTAGTCAGCAAGGATGGAAAAGATAAAGGGATTGCTT  
ATAT**TGAAT**TTAAGACAGAAGCTGATGCAGAAAAACCTTGGAAAGAAAAGCAGGGAAACAGAGAT**AGATG**GGCGATCT  
ATTTCCCTGTACTATACTGGAGAGAAGGGTCAAAA**TCAAGA**CTATAGAGGTGGAAAAGATAGCACTTGGAGTGG**TGA**  
**AT**CAAAAACCTCTGGTTTTTAAGCAATCTCTCCTACAATGCAACAGAAGAACTC**TTCAAGA**AGTATTTGAGAAGGCGA  
CTTTTATTAAAGTGCCCCAGAACCAAAATGGCAAATCTAAAGGGTATGCATTTATAGAATTTGCTTCATTT**GAGAT**  
**G**CTAAAGAAGCTTTAAATTCCTGTAATAAAAGGGAAATTGAGGGCAGAGCAATCAGGCTGGAGTTGCAAGGACCCAG  
GGGATCACCTAATG**CAAGA**AGCCAGCCGTCCAAAACCTTGTTTGTCAAAGGTCTGTCTGAGGATACCAAGAGAAA  
CATTAAAGGAATCATTCGACGGCTCTGTTCCGGCACGGATAGTCACTGACCGGGAGACTGGGTCTCCAAAGGGTTT  
GGTTTTGTAGAC**TTCAAC**AGTGAGG**AAGATG**CCAAAGCTGCCAAGGAGGCCATGG**AAGATG**GTGAAATTGATGGAAA  
CAAAGTTACTTTGGACTGGGCCAAACCGAAGGGTGAAGGTGGCTTTGGAGGTTCGCGGTGGAGGCAGAGGTGGCTTTG  
GAGGCCGAGGTGGTGGCAGAGGAGGCCGAGGTGGATTTGGTGGCAGAGGCCGGGGAGGCTTTGGAGGGCAGGAGGC  
TTCCGAGGAGGCAGAGGAGGAGGGGGAGACCACAAGCCACAAGGAAAGAAGACGAAGTT**TGAAT**AGTTTCTTCCATC  
CCTCTGTCTTTACCCTCTTCTGTTTGAAAGAAAAGGACTCTGGGGTTTTTACTCTGTTACCTGATCAATGACAGAGC  
CTTCTGAGGACATTC**CAAGA**CAGTATACAGTCCTGTGGTCTACTTGGAAGTTCGTATAGATAACAT**TTCAAG**GGAGA  
TACCCTGTTGGTTTTGACTGGAT**ATTCA**TATAAACTTTTTAAAG**AGATGA**GTGATAGAGCTAATCCTTATCTGTAAG  
TTTT**TGAAT**TTATATTGTTTCTTCCCATGTACAAAACCATTTTTTTTCTACGAATAGTTTTGTGTTTTGTTTTTTGCG  
TTGGGGGGGTGTAAAGGAAAGCAGAATGTTTTATCATGATTTTTGCTTCAGCAACTTTGGGACAAATTAAGATCCT  
AAACTCTG

91 2695 23, 68 (4, 86) 13.9σ

*Xenopus laevis* nucleolin L homeolog (ncl.L), mRNA NCBI Reference Sequence: NM\_001372137.1

TGTTGTCTGGTTCCATCGTAGAGACACG**TGAAT**AATCATCTCCCAAACGTAACACCGGCTACCATGGTGA  
AACTAGCTAAGGGTGCAAAAAC**TCAAG**CAAAGCC**CAAGA**AGGCAGCACCACCACCTCCAA**AAGAT**ATGGA  
AGACAGTGAGGAAGAGGAGGACATGGAAG**AAGATGA**CAGCAGT**GATGA**GGAGGTGGAAGTACCTGTGAAG  
AAGACACCAGCCAAAAAACAGCCACTCCAGCCAAAGCAACACCTGGAAAAGCAGCCACACCAGGAAAAGA  
AGGGAGCAACTCCAGC**CAAGA**ATGGAAAGCAGGCTAAGAAA**CAAGA**GAGTGAAGAAGAGG**AAGATGA**CTC  
**TGATGA**AGAGGCTGAGGACCAGAAACCTATTAAAAACAAACCAGTTGCTAAGAAAGCTGTAGCAAAAAAA  
GAGGAATCTGAGG**AAGATGACGATGATGAAGATG**AGTCTGAGGAGGAAAAGGCTGTTGC**CAAGA**AGCCTA  
CACCTGCAAGAAACCTGCAGGAAAAAACAGGAATCTGAGGAGG**AAGATGATGA**GAATCAG**AAGATGA**  
GCCAATGGAGGTTGCACCAGCTCTAAAGGGGAAGAAAACCTGCCCAAGCAGCGGAGG**AAGATGATGA**GGAG  
GAGGAC**GATGACGATGAGGAAGACGATGATGATGA**GGAGGAACAGCAAGGCTCTGCAAAACGCAAAAAAG  
**AGATG**CCAAAAACTATTCTGAGGCAAAAAAACAAAAACAGACACTGCATCAGAAAGGCTTGTCATCTT  
TATTGGGAACTTAACTCTACAAAGGAATTT**GATGAA**CTAA**AAGATG**CTCTGAGGGAGTTCTTT**TTCAA**AG  
AAGAACCTAACCATACAGGACATAAGGATTGGAAACTCAAAGAAGTTTGGGTATGTGGATTTCTCATCCG  
AGGAAGAGGTTGAGAAGGCTCTGAACTGACTGGGAAG**AAGAT**ACTTGGTACAGAGGT**AAGAT**TGAAAA  
GGCTATGGCTTTTGACAAAAACAAACTGCTGAAAATAAGAAGGAGAGGGATTCCCGAACTCTGTTTGTG  
AAGAACATCCCTATAGCACAACTGTTGAGGAGCTGCAGGAGATATTTGAAAATGCTA**AAGAT**ATTAGAA  
TTCCCACTGGCA**AAGATG**GATCAAATAAAGGGATTGCATATGT**TGAAT**TTAGCA**ATGAAGATGA**GGCAAA  
CAAAGCTCTTGAAGAGAAGCAAGGAGCAGAGATTGAGGGACGCTCTATTTTCGTTGACTTCACTGGTGAA  
AAGAGCCAGAATTCGGGAATAAAAAAGGACCCGAAGGCGATTCCAAGGTACTTGTCTGTAACAACCTGT  
CATATAGTGCAACAGAAGACAGCCTCCGTGAAGTCTTTGAAAAGCCACATCTATACGGATACCACAGAA  
CCAGGGACGGGCTAAGGGCTTTGCCTTTAT**TGAAT**TCTCTCTGCGG**AAGATG**CAA**AAGATG**CAATGGAT  
TCTTGTAACAACACAGAAATTGAGGGACGGTCCATACGGCTGGAGTTTAGCCAAGGAGGTGGCCC**TCAAG**  
GTGGTGGAAGGGGAGGTT**CAGCGCAGTCAAAAACCTCTTTG**TCAGAGGTCTTTCTGAAGACACCACTGA  
AGAAACCTTGAAGGAAGCATTTTGATGGCTCTGTTAATGCCAGGATTGTGACGGACAGAGATACTGGCGCA  
TCCAAGGGGTTTTGATTTGTAGACTTTTCCACTGCTGAAGACGCTAAAGCTGCCAAAGAGGCCATGGAGG  
ATGGGGAAATTGATGGAACAAAGTTACTCTAGACTTTGCAAAACCTAAAGGCGACTCCCAGCGTGGAGG  
ACGTGGGGGTTTTGGCAGAGGAGGTGGCTTTAGAGGTGGTTCGTGGTGGCAGAGGAGGTGGAGGAGGAAGA  
GGCTTTGGTGGCAGAGGTGGTGGACGCGGAAGAGGAGGATTTGGAGGAAGAGGAGGTGGAGG**ATTCA**GAG  
GTGGTCAGGGCGGAGG**ATTCA**GAGGTGGTCAGGG**CAAGAAGATGA**AGGTTT**GATGA**CTGAGCAGTTTTTCAT  
CTCCCTTTAAACCT**TCAAG**CCATCTCCCTGAAAGGACTCTGGGGGCAGAAAGGGAGATCTGGATTCCCTA

CCCCAAATAAATCTACTCTTGGCAGAGCCTTCTGTGTGGA**CATT**C CAATGTGGAAATACATGTTTCCTGT  
ATCACCTGGATTCCAAGTCATTTTCATGGAAGAGGGGACTGCTTGACTGTCATATACAGACTTTTTTTTAGA  
GTGTGAAAAGAAACCCTGCTGGGACTTGGCAAATTCTTTATGTTTTACCCACTGTACAA**AAGAT**TGAGTT  
TTTTTTTTCTTAATTCCTCTAGTATTTTGTCTAAAAGTGCAGACTGTTTCATGGTTTTGCTTCAGCAACGTG  
TCTTG**TTCAA**ATTAAAGAACCTCCTCTGGTTACCTGTTTTTAGTA

75 2421 18.9 (4.3) 13 $\sigma$

**Equus quagga nucleolin (LOC124228855), mRNA NCBI Reference Sequence: XM\_046643806.1**

CCCCAGTCTCGAGCTCTAGCTGGCAGCCAAACGTACGCGCTCCGGGATCTTCAGTACCTGCGGCCGCCATCGACG  
TCGCTTAGGTGCTTCTGGGCTCATCTGCGCCACACGCTACGCTGTCTTAAGCCGCCATCATGGTGAAGCTCGCAA  
AGGCTGGTAAAAATCAGGGTGACCC**CAAGA**AAATGGCTCCTCCCCCAAAGGAGGTAGAAGAAGAGAGTG**AAGATG**  
**AGG**AAATGTCAG**AAGATGAAGATGAT**GAGAGCAGTGAGAGAAGAGGTTGTTCATCCCTCAGAAAAAGGG**CAAGA**AGG  
CTACCACAACCTCCAGCAAAGAAGGTGATGGTTTCCCCAACAAAAAGGTTGCAGTTGCCACACCGGC**CAAGA**AAG  
CAGTTGTCACTCCTGGCAAAAAGGCAGCAGCTCTGCAGGC**CAAGA**AAGACAGTTACACCAGCCAAAGCAGTAGCAA  
CCCCTGG**CAAGA**AGGGAGCCACACCAGGCAAAGCATTGGTGGCAACCCCTGGTAAGAAAGGAGCAGCCACCCAG  
CCAAGGGAGCAAAGAATGG**CAAGA**ATGC**CAAGA**AAGAAGACAGT**GATGAGGAAGATGAC**GACGACAGTGAAGAG**G**  
**ATGAGGAGGACGACGAAGATGAAGATGAGGATGAAT**TTGAGCCAGCCGT**GATGAA**AGCAGCAGCTGCTGCTGCC  
CTGCCTCG**GATGACGAGGATGAT**GAGGAGGAGGAC**GATGACGACGATGAA**GACGACGACGAGGAAGAGGAGGAGG  
AGGAGGAG**GATGAAGATGACT**CTGAAGAAGAAGCTATGGAGACCACACCAGCTAAAGGAAAGAAAAGTGCAAAGG  
CTGTTCTGTGAAGGC**CAAGAGC**ACAGCTGAG**GATGAAGACGACGACGAGGATGAA**GACGACGAGGAG**GATGA**GG  
AGG**AAGATGATGAGGATGAGGACGATGAC**GAAAGAGGA**AAGATGAGGACGACGAGGAGGAGGAAGAGGAAGAGCCTG**  
TCAAAGAAGCACCTGGAAAACGAAAGAAGGAAATGGCCAAACAGAAAGCAGCTCCCGAAGC**CAAGA**AGCAGAAAAG  
TGGAAGCCACAGAACCAACTACATCT**TTCAA**TCTCTTTGTTGGAAACCTGAACTTCAGCAAACTGTCTCC**TGAAT**  
TAAAAACGGGTATCAGTGACATTTTTTGTCTAAAATGATCTTGCTGTTGTGGACGTCAGAATTGGTGTGTCTAGGA  
AGTTTGGCTATGTGGATTTTGAATCTGCTGAAGACCTGGAAAAAGCCTTGGAATCACCAGTTTAAAAAGTCTTTG  
GCA**ATGAA**ATTAACTAGAAAAACCAAAGGGAAAAGACAGTAAGA**AAGAT**CGGGATGCCAGGACACTTTTGGCTA  
AAAATCTGCCTTACAAAGTTACTCAG**GATGAAT**TAAAAGAAGTGTGTT**AAGATG**CTCTGGAGATCAGATTAGTCA  
GCAAGGATGGAAAGAGTAAAGGGATTGCTTATAT**TGAAT**TTAAAACAGAAGCTGATGCAGAGAAAACCTTGGAAG  
AAAAGCAGGGAACAGAGAT**AGATGG**ACGATCTATTTCCCTGTACTATACTGGAGAGAAAAGGTCAAAG**TCAAGA**CT  
ACAGAGGTGGAAAGAATAGCACTTGGAGTGG**TGAAT**CAAAAACCTCTGGTTTTTAAGCAACCTCTCCTATAATGCAA  
CTGAAGAAACTCTTCAGGAAGTATTTGAGAAGGCAACTTTTATCAAAGTGCCCCAGAACCAAAACGGCAAATCTA  
AAGGGTATGCATTTATAGAATTTGCTTCATTT**AAGATG**CTAAAGAAGCTTTAAATTCCTGTAATAAAAGGGAAA  
TTGAGGGCAGAGCAATCAGGCTGGAGTTGCAAGGACCGAGGGGATCACCTAATG**CAAGA**AGCCAGCCATCCAAAA  
CTCTGTTTGTCAAAGGGCTGTCTGAGGATACCACAGAAGAGACATTGAAGGAGTCGTTTGACGGCTCTATTCGTG  
**CAAGA**ATAGTCACTGACCGGGAGACCGGATCCTCAAAGGGTTTGGTTTTGTAGAC**TTCAA**CAGTGAAGAAGACG  
CCAAAGCCGCCAAGGAGGCTATGG**AAGATG**GTGAAATTGATGGAAACAAAGTTACTTTGGACTGGGCCAAGCCTA  
AGGGCGAAGGTGGATTTGGGGGCCGTGGTGGAGGCAGAGGTGGCTTTGGAGGCCGAGGTGGTGGCAGAGGAGGCC  
GAGGTGGATTGCGCGGCAGAGGCCGGGGAGGCTTTGGAGGGCGAGGAGGCTTCCGAGGAGGCAGAGGAGGAGGAG  
GAGACCACAAGCCACAAGGAAAGAAGACGAAGTT**TGAAT**AGTTTCTTCTGTCCCTATGTCTTTCCCTCTTCATTG  
AAAGAAAGGACTCTGGGGTTTTTACTCTGTGTACCTGATCACTGACAGAGCCTTCTGAGGACATTC**CAAGA**CAGTA  
TACAGTCCTGTGGTCTACTTGGAAAGCCGTATAGATAACAT**TTCAAG**GGAGATACCCTGTTGGTTTTTACTGGAT  
ATTCTGTATAAACTTTTTTAAAG**AGATGAGT**GATAGAGCTAATCCTTATCTATAAGTTT**TGAAT**TTATATTGTTTCT  
TCCCTTGTACAAAACCATTTTTTTTCTACAAATAGTTTTTTTTTGTTTTTTTTTTTCGTTGGGGGGGTTGTAAAGG  
AAAGCAGAATGTTTTATCATGATTTTTTGCTTCAGCAACTTTGGGACAAATTAAAAGTCCTAAACTCTG

87 2689 23,63 (4,86) 13 $\sigma$

**Manacus candei nucleolin (NCL), mRNA NCBI Reference Sequence: XM\_051781646.1**

CGTGTCAAGTCCCCGGCCCGGCCGCGCGCTCCCCGCCGCTCCCGCCGCGCCACCGGCACCGCTCCCGCCGCGC  
CGCCGGCACCGCCCGCCCCGCGCTCTGCACAGCCCCGGCCGCGCTCCCTGCGCCGCCAGGCACTGCCGCCATCAT  
GGTGA**AAGAT**CGC**CAAGA**CCCCGAAGAACCAGATCAAACAGAAGAAAATGGCTCCTCCTCCGAAAAAGTTTCAGGGA  
GAGCGAGGAGGAAGAGTCTCTGACCTAGACGAAAGCAGCGGAGAAG**AGATGAT**CCCTCAGAAGAAACCACAAAA  
AGTAGCTGTTACCCAGC**CAAGA**AGGTTGCTACACCTGCAAGAAGGTTGCTACTCCTGCAAAAAAGGCAATTAC  
ACCTGCAAAGAAGGCTGTGCCTACTCCACAGCCCCAAAAGGCTGTTGCTCCATCACCTAAAAAGGCAGCTGTCCT

AACCAAAGGAGCAAAAAACGGAAAGAAATGCC**CAAGAAGCAAGA**GAGGAGGAGGAG**GATGA**CGACG**CAAGATGATGA**  
**TGAAGATGA**GGAGGAC**GATGA**GGAGGAG**GATGAA**GAGGAAG**AAGAT**TCT**GATGA**GGAGGAGGAACCAATGCC  
TGTGAAGCCTGCAGCCAAAAAGCCTGCAGCAGTACCAGCCAAAAAGCCTGCAGTTGTGCCAGCAAAGCAGGAATC  
TGAGGAGGAG**GATGAA**GAG**GATGATGA**GG**AAGATGATGAA****AAGATGATGA**GTCTG**AAGATGAA**GCCATGGACAC  
AGCCCCGTGTTCCAGTGAAGAAAACCACTCCAGCCAGGGCCACACCAGTGAAGCCAAGGCAGACTCTG**AAGATGA**  
GG**AAGATGATGATGA**GGAAGAC**GATGAA**GAG**GATGATGA****GATGATGAA**GAGGAGGATGCTGAGGAGGAAAGTGA  
G**GATGAA**AAACCTG**TCAAG**GAAGCACCTGGAAAGAGGAAGAAAGAAATGGCCAATAAAAGTGCACCAGAGGC**CAA**  
**GA**AGAAGAAAAC**AGATG**GACCTGTGTCACTTTCTCCCTCTTTGTGGGAAATTTGGTCTGCACCAAGGAGTTTGA  
AGAGCTGAAGGCTGGCATCAGAGAATTCTTTGGGAAGAAGAATATTGAAGTTTT**AGATG**TCAGAATTGGTGCTTC  
CAAGCGGTTTGGCTATGTGGACTTCTCATCTGCTG**AAGAT**CTGGATAAAGCTCTCCAA**ATGAAT**GGAAGAAGTT  
AATGGGTTTCAGAAATCAAACCTGGAAAAAGCAAAGAGCAAGGAAACT**ATGAA**AGAAAATAAGAAAGAGAG**AGATGC**  
CAGAACACTGTTTTTTGAAGAACCTGCCCTACCGTGTAACCGAG**GATGAA****TCAAG**GAGGTGTTTTGAAAATGCAGT  
AGAAGTCCGGATAGTACTGAACAAGGATGGAAGCAGCAGAGGGATGGCCTATGT**TGAAT**TTAAACAGAAGCTGA  
GGCAAACAAAGCTCTGGAGGAGAAGCAGGGCACGGAGATTGAGGGTCGTGCTGTGATCATTGACTTCACTGGTGA  
GAAGAGCCAGCAGGAACATCAGAAAGGAGGTGGAGAGAGGGGAGTCAAAGACCCTAGTTGTCAACAACCTCTCGTA  
CGCCGCTACGGAAGAGACACTCACTGTT**TAAGA**AAGCTTCTTCCAT**TCAAG**CTGCCACAGAACAACCAGGGCAGGT  
CTAAAGGATATGCGTTTCGTAGATTTTCCCACAGCTGAGGATGCCAGGGAGGCAT**TGAAT**TCCTATAACAACACAG  
AGGTTGAAGGCAGAACAATCAGACTGGAGTTCAGTGCACCATCATGGCAGAAAGGGAACACGAACGCACGAGGAG  
G**ATTCA**GTCAAGCAAAGCAAACATTGTTTTGTCAAGGCCTTTCTGAGGACACCACGGAAGAGACGC**TAAGA**GAAT  
CATTTGAAGGCTCTATAAGTG**CAAGA**ATAGTCAAGACAGAGACACTGGATCATCTAAAGGGTTTGGATTTGTGG  
ACTTCAGCTCTGCAG**AAGATG**CCAAAGCAGCTAAAGAAGCCATGGAAGACGGGGAGAT**AGATG**GCAACAAAGTGA  
TCCTTGATTTTGCCAAGCCAAAGGGTGACTTCCAGCGTGCGCGCGGATTTGGTGGTCTGGCGGCAGAGGAGGCG  
GCCGAGGAGGAAGAGGTGGATTTGGTGGCAGAGGTGGTGGCAGAGGTGGATTTGGAGGTAGAGGTGGCTTCCGAG  
GAGGCAGAGGAGGAGGTGGAGATCACAAGCCACAAGGAAAA**AAGAT**AAAGTT**TGAAT**AAACTTCCCCTTTCCTTC  
CCCTTCTTCTGCTCTCCGAGACTATCTGAAAGGACTCCGGGGGTTTTTTATTCTCCTTTGATCTTGGCGGAGCCTT  
CGGAGGACATTC**CAAGA**AGCGAAGCAGTACTGTGAGCCACTTGGAATACTAATTTTTCAT**TTCAAG**GAAGCGAG  
AGCAAGCCATTTTGACTGCTTGCCTG**TTCAA**AGGAACTTTTTAAAAAAAAAACACAAGTGAT**AGATG**TGGGAATT  
TACCCCTTGTCTGTGAGTTGTCT**TGAAT**TTATAATGTTTTTACCATGTACAAATTTTTTTTTTTCCTATAAACTTCT  
GTAGCATTTTTTGTCTGTAAAAATGCAGAATGTTTTATCATTTGTGCTTCAGCACCCCTGTCTTGGACAGATTAAAGG  
ACCTAAACTGGTTTCGTGTTACTTCTGTGCCACTAA**ATGAA**GCCAGGCTGGGAGAAAGAGGCTGTCTATAGCCTTC  
CCTCTCTTGATTAAGGTCATTAGTGTACAGCAGCAGCTTCTGTCTGCTTTGCTTGAGCTTGTGTCACTGCC  
AGCTCTGTGTGTGTGCTGTGTTAGAGTGCTTGCAGGAAGGAGGGCAGAAGAATATGATTGCCAAGGTAAGCTCTG  
TGACCACAACCATGTTTTTATTTTATTTTTTTTTTAAC**TAAAGATG**CTGTGATGGTG

**Table S3.** Examples of P-pentamer content in nucleophosmine (NPM1) of 15 species (8 among them from Table S4). Red color represents P-pentamers, blue color corresponds to overlaps.

Homo sapiens nucleophosin 1 (NP1), transcript variant 1, and NP1-2B reference sequence (NM\_001555004.1)  
 GGGCGATGTCCTTGCTAATTTGGAGACT**GATTCAG**TCCCCCTTTTGGCCCCCAAGTTACGTA**AAGAT**AAGG  
 ACTTTGG**AGATG**TTTTCTCAGGAAGGACAGAGCTGAAAAACAAAGTTCCTGCGTGCCGCCACC CGATGG**A**  
**AGAT**TCGATGGACATGGACATGAGCCCCCTGAGGCCCCAGAACTATCTTTTCGGTTGTGAACATAAGGCC  
 GACA**AAGAT**TATCACTTTAAGGTGGATAAT**GATGAA**AATGAGCACCAGTTATCTTTAAGAACGGTCAGTT  
 TAGGGGCTGGTGCAAAG**GATGAG**TTGCACATTGTTGAAGCAGAGGCA**ATGAAT**TACGAAGGCAGTCCAAT  
 TAAAGTAACACTGGCAACTTTGAAAATGTCTGTACAGCCAACGGTTTCCCTTGGGGGCTTTGAAATAACA  
 CCACCAGTGGTCTTAAAGTTGAAGTGTGGTTCAAGGCCAGTGCATATTAGTGGACAGCAGTCTAGTAGCTG  
 TGGAGGA**AAGATG**CAGAGTCAG**AAGATGAA**GAGGAGGAGGATGTGAAACTCTTAAGTATATCTGGAAAGCG  
 GT**CTGCC**CCTGGAGG**TGGTA**GCAAGGTTCCACAGAAAAAAGTAAAACTTGCTGCT**GATGAA****GATGA**TGAC  
**GATGA****TGATGA**AGAG**GATGATGATGAAGATGATGATGA****TGATGA**TTTT**GATGA**TGAGGAAGCTGAAGAAA  
 AAGCGCCAGTGAAGAAATCTATACGAGATACTCCAGCCAAAAATGCACAAAAGTCAAATC**AGAATGG**AAA  
 AGACTCAAAACCATTCAACAC**CAAGAT**CAAGAAAGGA**CAAGA**ATCC**TTCAAGA**AACAGGAAAAAACTCTCT  
 AAAACCAAAAGGACCTAGTTCCTGTAGAAGACATTAAAGCAAAAAATGCAAGCAAGTATAGAAAAAGGTG  
 GTTCTCTTCCCAAAGTGAAGGCCAA**ATTCA**TCAATTATGTGAAGAATTGCTTCCG**GATGAT**CGAC**CAAGA**  
 GGCT**ATTCAAGAT**CTCTGGCAGTGGAGGAAGTCTCTTTAAGAAAAATAGTTTAAACAATTTGTTAAAAAAT  
 TTTCCGTCCTTATTTTCATTTCTGTAACAGTTGATATCTGGCTGTCCCTTTTTATAATGCAGAGTGAGAACTT

TCCCTACCGTGTTTGATAAATGTTGTCCAGGTTCTAT**TGCCAAGAATG**TGTTGTCCAAAATGCCTGTTTA  
GTTTTTAA**AAGATG**GAACTCCACCCTTTGCTTGGTTTTAAGTATGTATG**GAATG**TTATGATAGGACATAGT  
AGTAGCGGTGGTCAGACATGGA**AATGGT**GGGGAGACAAAAATATACATGTGAAATAAACTCAGTATTTT  
AATAAAGTA

56 1265 11.12 (2.23) 20.1 $\sigma$

**Monodelphis domestica** chromosome 1, MonDom5, whole genome shotgun sequence NCBI Reference Sequence: NC\_008801.1:  
370685271-370685328,370686664-370686743,370687211-370687330,370688825-370688918,370689214-370689320,370689406-  
370689467,370690271-370690331,370690654-370690737,370691499-370691600,370693874-370693948,370695025-370695063 NPM1  
ATGGAGGACTCCATGGA**AATGG**ATATGAGCCCCCTCCGGCCCCAGAATTTCTTTTCGGTTGTGAACTAA  
AGGCTGACA**AAGAT**TATCATTTTAAGGTAGATAAT**GATGAA**AATGAGCACCAGTTGTCATTGAGGACTGT  
GAGTCTAGGGGCTGGTGCAAAG**GATGAAT**TGCATATTGTTGAAGCAGAGGCACTGAACT**ATGAA**GGAAAT  
CCAATTAAAGTAACATTGGCATCTTTGAAAATGTCTGTTTCAGCC**TACTG**TTTCTCTAGGTGGCTTTGAGA  
TTACACCACCAGTAGTTTTGCGGTTAAAATGTGGTTCAGGGCCTGTACATGTGAGTGGCCAGCACTTAGT  
GGCTCTGGAGG**AAGATG**CAGAATC**AGATGATGA**AGG**AAGATGATATGAA**ACTCCTAAACATGTCTGGC  
AA**AAGAT**CTGCTCCTGGAGT**TGGTAG**CAAGGTTCCACAGAAAAAGGTAAACTGTCTGAAG**AAGATGAA**  
**AAGATGATGA**AGAAGAC**GATGATGATGA**AGAT**GACGATGATGATGA**CTTT**GAAAGATGA**GGAAAGTGAAGA  
AAAGACCCCTCCAGTGAAGAAATCTGTTCTGTGA**TACTGC**AGCAAAAAATGCACAAAAATCAAACCA**GAAT**  
**GGAAAGATTCAA**AGCCGTCCACACCAAAAGCAAAGGG**TCAAGAT**TCC**TTCAA**AAAGCAGGATAAGACTC  
**CAAGACT**CCCAAAGGACCCACTTCTCTAGAGGATATTAAAGCAAAAAATGCAGGCAAGCATTGAAAAGGG  
TGTTTCCCTCCCAAAGTGAAGGCAA**ATTCA**TCAACTATGTAAAGAATTGCTTCCGGATGTCTGATCAG  
GAGGCT**ATTCAAGAT**CTCTGGCTGTGGAGGAAATCTCTTTAA

53 878 7.7 (2.77) 16.4 $\sigma$

**Rattus norvegicus** nucleophosmin 1 (Npm1), mRNA NCBI Reference Sequence: NM\_012992.4  
GGCGTGATTCCGTGCTGCTGTTCTGTCGGAACAGTAGGCAGTTGTTTTCCGTCCGGCTTCTCTCAC  
ACT**CAAGT**GC CGCGCTCCACCTCATGGAAGACTCGATGGACATGGACATGAGCCCTCTTAGGCCTCAGAA  
CTACCTTTTTCGGTTGTGAACATAAAGGCTGACAA**AAGAT**TATCACTTTAAAGTGGATAAT**GATGAA**AATGAG  
CACCAGTTATCATTAAGAACGGTCAGTTTAGGAGCAGGGGCAA**AAGATGA**GTTGCACATCGTAGAGGCAG  
AAGCA**ATGAACTATGAA**GGCAGCCCAATTAAAGTAACACTGGCAACTTTGAAAATGTCTGTACAACCAAC  
AGTTTCCCTTGGGGGCTTCGAAATTACACCACCTGTGGTCTTGAGGTTGAAGTGTGGTTCTGGGCTGTG  
CACATAAGTGGACAGCACCTAGTAGCTGTAGAGG**AAGATG**CAGAGTCAG**AAGATGAA****GATGA**GG**AAGATG**  
TAAACTCTTAGGCATGTCTGGAAAGAGATCTGCTCCCGAGGTGGTAACAAAGTCCACAGAAAAAGT  
AAAACTT**GATGAAGATGATGATGA**GG**GATGATGA**AGAT**GATGA**G**GATGATGA**AGAT**GATGATGATGATGAT**  
TTT**GATGA**AGAGGAAACTGAAGAAAAGGTTCCAGTGAAGAAATCTGTACGAGATACCCAGCCAAAAATG  
CACAAAAATCAAACCAA**AATGGGA****AAGAT**TTAAAACCATCAACACCAAGGTCAAAGGG**TCAAGA**GTCC**TT**  
**CAAAAAACAGGAAAAAACT**CCCAAAACACCCAAAGGACCTAGCTCTGTAGAAGACATTAAGGCAAAAATG  
CAAGCAAGTATAGAAAAAGGTGGTTCTCTTCCCAAAGTGAAGCCAAGTTCATTAATTATGTGAAGAATT  
GTTTCCG**GATGA**CTGACCAGGAGGCT**ATTCAAGAT**CTCTGGCAGTGAGGAAAGTCTCTTTAAGAA**AATGG**  
**TTTAAACAGTTTGA**ATAATTCTGTCTTCATTTCTGTAATAGTTGCTATCTGGCTGTCTTTTATAATG  
CAAAGTGAGAACTTTCCCT**TACTGT**GTTTTGATAAATGTTGTCCAGG**TTCAA**T**TGCCAAGAATG**TGTTGTCT  
AAAATGCCTGTTTAGTT**TTCAAG**GATGGAATCCGCCCTTTACTTGGTTTTAAGTATGTATG**GAATG**TTA  
TGATAGGACATAGTAGTAGTGGT**AGATGT**GGA**AATGGTA**GGGAGACAAATATACATGTGAAATAAA  
CTCAGTATTTTAAATAAAGTAA

63 1277 11.22 (3.35) 15.5 $\sigma$

**Mytilus coruscus** (NPM1) strain wild genome assembly, contig: Mco4455, whole genome shotgun sequence GenBank:  
CACVKT020004326.1: 1333240-1333270,1339978-1340075,1344856-1344978,1348482-1348578,1355357-1355508,1356028-  
1356072,1356980-1357071,1357859-1357886,1374471-1374521,1383748-1383807  
**ATGAATGAA**CCCTG**CAAGA**GAGTACTTTTGGGGAATAACATTAGACAAAGAAAAATCCAACATTTACATGGA  
CATTTGAAGAGGAGGAAG**AAGAT**ACAGATTATT**TGGTAC**ACACCTTGTTTCTTAAGCAGGCAGTTTTAGG  
AGCATCTGCAGTAA**AAGATGAA**AGAAATCTGTACAAATAGAAACAAAGAATTTTGATCAAAAAAGAAATTG  
AAACAA**CCATT**ATTATCATTAACATTGGGAAAAAATGATATGACAAGTTT**AGATGT**GAGTTTTGGT**CATG**  
**AAGTAGCTGTAGT**TTTTAGACTTGTGGAGGGTAGTGACCAGTTTGTATTATCAGCTCAGCAGTTAGTAGA  
ATATCC**AGATGAT**AGAAACATGTCA**CAAGATGAAT**CAGAATTA**GAATG**CACAGAAGAGGAAGAAGAGGAG  
GAAGAGGAAGAAGAAATCACCAGAAAGCTGAAGTCACAAAAAGAGAAAAGCATCATCAAAAAATCTG  
GCAAAAA**CAAGAAAAAAGGG****AAGATG**GAAGTGAGC**CAAGATGATTCAG****AAGATGAGGATGAGGATGAAGA**  
**AGATATGATGA**AGAG**GATGAAGATGA**AGTATG**GATGATGATGA**G**GATGAA**GAAGAAATGAGTAGTCCA  
GAAAAAAGTGATAAAAAAGAAAGGGAA**GAATG**CCAAGAAAGCTAAGA**AAGATGAT**GGAAGGCCAAAGAAAG  
GTGGA**AAGATG**GCCAAGGTCTCTCCAAAGA**AAGATG**CAAATTC**CAAGA**AAGCAAAAGAAAAACCGCTAAAGC

CAAGTAG

57 773 6.8 (2.6) 15.4 $\sigma$

**Bos taurus nucleophosmin (NPM1) gene, NPM1-GG allele, exon 1 and partial cds GenBank: GQ144334.1**

GCTTCTCTCCACATAAGTGCGTGCAGCCAACCCATGGAGG**ATTCAA**TGGACATGGACATGAGCCCCTTG  
AGGCCCCAGAACTATCTTTTCGGTTGTGAACTAAAGGCTGACAGAGATTATCAC**TTCAAG**GTGGATAAT**G**  
**ATGAAA**ATGAGCACCAGTTATGTTTAAGAACGGTCAGTTTAGGGGCTGGAGCAAAG**GATGA**GTTACATGT  
TGTTGAAGCAGAGGC**GATGAAT****ATGAA**GGCAGTCCAATTAAGTAACACTGGCAACTTTGAAAATGTCT  
GTACAGCCAACGGTTTCTCTTGGGGGCTTTGAAATTACACCACCTGTGGTCTTACGGTTGAAGTGTGGTT  
CAGGGCCTGTGCATATCAGTGGACAGCACTTAGTAGCCGTGGAGG**AAGATG**CAGAGTCAGAAGAGGAGGA  
GGAGGAGGAGGTGAAACTCCTGAGTATATCTGGAAAGCGTTCTGCCCTGGAAG**TGGTA**GCAAGGTTCCC  
CAGAAAAAAGTGAAGCTTGCTGCT**GATGAAGATGAAGATGATGATGAC****GATGA**C**GATGATGATGATGATG**  
**AAGATGATGATGATGAC**GATTTT**GATGA**GGAAG

39 589 5.2 (2.3) 14.7 $\sigma$

**Mus musculus (NPM1) full open reading frame cDNA clone RZPDo836E0452D for Nucleophosmin 1, GenBank: CT010327.1**

ATGGGTGACTGGAGCGCCTTGGGGAAGCTGCTGGACAAGGTCCAAGCCTACTCCACGGCCGGAGGGAAGG  
TGTGGCTGTCGGTGCTCTTCATTTTCAGAATCCTGCTCCTGGGGACAGCGGTTGAGTCAGCTTGGGGT**GA**  
**TGAA**CAGTCTGCCTTTTCGCTGTAACACTCAACAACCCGGTTGTGAAAATGTCTGCTATGACAAGTCCTTC  
CCCATCTCTCACGTGCGCTTCTGGGTCCCTCAGATCATATTTCGTGTCTGTGCCACACTCCT**GTACT**TGG  
CTCACGTGTTCTATGT**GATGAG**AAAGGAAGAGAAGCTGAA**CAAGA**AAAGAAGAGGAGCTCAAAGTGGCGCA  
GACCGACGGGGTCAACGTGG**AGATG**CACCTGAAGCAGATTGAAA**TCAAGA**AG**TTCAAG**TATGGGATTGAA  
GAACACGGCAAGGT**GAAGATG**AGAGGTGGCCTGCTGAGAACCTACATCATCAGCATCCTC**TTCAAG**TCTG  
TCTTCGAGGTGGCCTTCTGCTGATCCAGTGGTACATCTATGGGTTCAGCCTGAGTGCGGTCTACACCTG  
**CAAGAG**AGATCCCTGCCCCCACCAGGTGGACTGCTTCCTCTCACGTCCACGGAGAAAACCATCTTCATC  
ATCTTCATGCTGGTGGTGTCTTGGTGTCTCTCGCTC**TGAAT**ATCATTGAGCTCTTCTATGTCTTC**TTCA**  
**AGGG**CGTTAAGGATCGCGTGAAGGGAAGAAGCGATCCTTACCACGCCACCACCGGCCCACTGAGCCCATC  
CAAAGACTGCGGATCTCCAAAATATGCTTAC**TTCAA**TGGCTGCTCCTCACCAACGGCCCCACTCTCACCT  
ATGTCTCCTCCTGGGTACAAGCTGGTCACTGGTGACAGAAACAATTCTCCTGCCGCAATTACAACAAGC  
AAGCCAGCGAGCAAAACTGGGCGAATTACAGCGCAGAGCAAAATC**GAATGG**GGCAGGCCGGAAGCACCAT  
CTCCAACCTCCACGCCCAGCCGTTTGATTTCCCTGACGACAGCCAAAATGCCAAAAAAGTTGCTGCTGGA  
CACGAACCTCCAGCCCTTAGCTATCGTGGATCAGCGACCTTCCAGCAGAGCCAGCAGCCGCGCCAGCAGCA  
GACCTCGGCCT**GATGAC**CTGGAGATTTAG

37 589 5.18 (2.275) 14 $\sigma$

**Xenopus tropicalis nucleophosmin (nucleolar phosphoprotein B23, numatrin) (npm1), mRNA NCBI Reference Sequence: NM\_203552.1**

GTCCGTGCCGCTGTAGAGTAGAGGG**GGTAC**ATC**TGAAT****TGAAT**TGGAACAA**AATGG**AAGACTCCATGGAT  
ATGGATAGCATTGCTCCCCTGCGCCCTCAGAATTTTCTCTTTGGATGTGAACTTAAAGCAGACAAAAGAG  
AAT**ATTCA**TTTAAAGTT**GAAGATGATGAAA**ATGAGCACCATTGTCATTGAGAACGGTTAGTGTGGGTGC  
ATCTGCTA**AAGATG**AGCTGCATGTTGTTGAGGCTGAAGGAATAAATT**ATGAA**GGGAAAA**CCATT**AAAAAT  
ACACTTGCCTCATTGA**GCCAT**CTGTGCAACCAACGGTTTCTCTAGGGGGATTTGAGATAACACCACCAG  
TAATCTTGCGTTGAAATCTGGGTCAAGGCCAGTATATGTCAGTGGGCAGCATCTTGTGGCTTTAG**AAGA**  
**TCTTGAAT**CCAC**AGATGATGAAGATGA**GGAACATGATGTGCCAGTCCAAAAAATGCAAAAAGGACGGCA  
TC**AGATG**CTGCATCAAAGGTTCCCTCGGAAAAAACACGTCTGGAGGAAGAGGACGAGGCT**GATTCA**GACG  
AG**GATGATGATGATGATGAC****GATGATGA**GGAGGAGGACGACG**AAGATGA****GATGAA**GAG**GATGAA**ACACC  
TGTTAAAAAGACTGACTTGCCTACAAAACCAAAGGCAGCTCAAAAGTTAAATCAC**AATGG**GAAGGCTTCT**T**  
**GAAT**TACCCACACCCTAAAGACTCCAAAAACTCCAGAGCAGAAAGGAAAGCAGGATACAAAGCCTCAAA  
CACCAAAGACACCAAAACGCCTTTGTCTTTT**GATGAA**ATAAAAGCA**AAGATG**CAAACCTCATTAGAAAA  
GGGCACTGTTCTTCTTAAAGTGGAAGTAAAGTTTGCAAACTATGTGAAGAATTGCTTTAGGACAGAAAAAT  
CAGAAGGTA**ATTCAAGAT**CTTT**TTCAA**TGGAGACAGTCCCTGAAAGACTCAAAATAAA**CCTGCC**TCTTGT  
TATCAAA

47 983 8.64 (2.9) 13.1 $\sigma$

**Lipotes vexillifer nucleophosmin-like (LOC103076865), misc\_RNA NCBI Reference Sequence: XR\_456924.1**

GTGATTCCGTCCTGTGCACCTGTTCCCTGGAGCAGTAGTCTTTTTTCTCCGTCCGCCTTCTCTCCACCT  
AAGTATGTGCCACCAACCCATGG**AAGAT**TGCATGGACATGGACATGAGCCCCCTGAGGCCCCAGAACTAT  
CTTTTCTGTTGTGAACTAAAGGCCGACAA**AAGAT**TATCACTTTAAGGTGGATAAT**GATGAA****AATGG**GCACC

ACCCCGGGCACCAGTTATCTTTAAGAACGGTCAGTTTAGGGGCTGGCACAAAG**GATGAA**CTGCACATTGT  
CGAAGCAGAGGC**GATGAAT****TATGA**AGGCAGTCCAATCAAAGTAACACTGGCAACTTTGAAAAATGTCTGTG  
CAGCCAACGGATTTCTTTGGGGGCTTTGAAACAACACCACCTGTGGTCTG**ATGGT**TGAAGTGTGGTTTCAG  
GGCCTGTGCATATTAGTGGACAGCACTTAGTAGCTGTGGAGG**AAGATG**CAGAGTCAGAAGACAAAGAGGA  
GGAGGTGTGACACTCCTAAGTATGTCTGGAAAG**CATTCTGCC**CCTGGAAGCGGTAGCAAGCTTCCACAG  
AAAAAAGTAAACTTGCTGCT**GATGAAGATGAAGATGATGATGAAGATGACAATGAAGATGATGA**CTCT**G**  
**ATGATGAGGAAGCTGAAGAAAAAGCTCCAGTAAAGAAATCTCCATCAACACC****AAGAT**CAAAAGG**TCAAGA**  
ATCC**TTCA**AAAAACAGGAAAAAACTCCTAGAACACCGAAAGGACCTAGCTCTTAGAAGACATTAAAGCAA  
AAATGCAAGCAAGTATAGAAAAAGGTGGTTCCCTTCCCAAAGTGGAAGCCAA**ATTCA**TCAATTATGTGAA  
GAACTGTTTCCG**GATGACT**GACCAGGAGGCT**ATTCAAGAT**CTCTGGCAGTGGAGGAAGTCTCTTTAA

44 903 7.9 (2.8) 12.9 $\sigma$

**Bauhinia variegata (NPM1) isolate BV-YZ2020 chromosome 9, whole genome shotgun sequence GenBank: JAKRYI02000009.1:**

ATGGAGTTCTGGGGTATTGAGGTAAAGAGTGGGGAGACTGTGAAAGTCGATCCTGAGGAATTTGATGCTT  
ACGTACATCTTTACAGGCTGCTCTGGGGGAGTGAAGA**AAGAT**AGTGGAAAGTGAGAAGGTGGTTCTTCA  
TTTGAAAGTTGGTGACCAGAAGCTTGTTTTTGGGAACACTTTCTAGGGAAAAATTTTCTCAGCTGTCTTTT  
GATATCGTCCTTGATAAGGAATTTGAGCTCTCTCATAATTGGAAAAATGGGAGTGTCTACTTCTGTGGAT  
ACAAAGCTGAAGTGCC**AGATGAGGAGGATGACTTC****GATGATGAGAGT****GATGATGA**CGAGGATCTGCCAAT  
GATCTCCCTAGACAATGGAAAACCTTGACACAAAGACTGAAGTTGGGGATGGTAACTTAAAAAATCTGCT  
GCCAAGGTCCTTCAG**TGAATCAAGTCAAG**GTTGCT**GATTCAA**AGA**AAGATGAA**GAGGAAGACTCAG**AAG**  
**ATGATGATTCTGATGATGATGATTCTGACGAAGAAGATGATGGTGGAAAGTTCTGAAGAGGA****CAAGATGGA**  
TGCTGATAGTGATAGT**GATGAAGATGATGAA**GAGACACCTAAGAAGGCATACCAGGG**CAAGA**AAAAGACCC  
AATGATTCTGCAACAAAACTCCTATCTCTT**CAAGA**AAGCTAAAGCTGCTACTCCACAAAAGACTGATG  
GTAAGAAAGGTGGTCATACAGACACTCCTCACCTAAGAAGGACATAAAGACTCCGAACAGTGA CTCTAA  
ATCTGGTGAAAATTCTCCTGCAAGTCCTGCAGCAAGTCT**TTCAA**CTCTGATGCTGGCCTGCAGCAAC**AT**  
**TCAAAGGCTAAGCATGCTTGA**

41 857 7.5 (2.7) 12.2 $\sigma$

**Ictidomys tridecemlineatus (NPM1) isolate GS200 Itri18, whole genome shotgun sequence GenBank: JAESOR010000030.1: c12799998-12799927, c1279902-12799338, c12799288-12799122**

ATGG**AAGAT**TTGTTGGATATGGACATGAGCCCCCTGAGGCCCCAGAAGTACCTTTTTCGGTTGTGAGCTAA  
AAGTGGATAAT**GATGAAA**ATGAGCACCAGTTATCA**TCAAGA**ACGGTCAGTTTAGGGGCTGGTGCAAAG**GA**  
**TGAAT**TGCACATTGTGCAAGCAGAGGCA**ATGAAT**TATAAAGGCAGTCCAATCAAAGTAACACTGGCAACA  
TTGAAAATGTCTAGTACAGCCAACGGTTTCCCTTGGGGGCTTTGATATCACACCACCTGTGGTCTTAAGGT  
TGAAGTGTGGTTTCAAGGCTTGTGCATATTAGTGGACAGCACTTAGTAGCTGTGGAGA**AAGATG**CAGAGTC  
AGA**AAGATGAGGAGGAGGAGGATGTGAA**ACTCTTAAGTGTATCTGGAAAGCGAT**CTGCC**CCTGGAGG**TGGT**  
**AGCAAGGTTCCCCAGAAAAAAGTAAA**ACTTGCTGCT**GATGAAGAT**TCCAT**GATGAA****AAGATGATGATG**  
**ATGATGAAGATGATGATGA**TTTT**GATGATGA**GGAAAGTGAAGAAAAAGCTCCAGTGAAGAAATCTATACG  
AGATATTCCAGCCAAAAATGCACAAAAATCGAACCA**GAATGG**AAAAAGACTCAAAACCAACAACAC**CAAGA**  
**TCAAAAGGACCTAGTTCTGTGCAAGACATTAAAGCAAAAAATGCAAGCAAGTATAGAAGAAGGTGATTCTC**  
**TTCCCAAAGTGGAAGCCAAGTTCGTCAATTATGTGAAGAATTGCTTCCG****GATGACT**GACCAGGAGGCT**AT**  
**TCAAGAT**CTCTGGCATTGGAGGAAGTCTCTTTAA

39 800 7 (2.65) 12.1 $\sigma$

**Pan troglodytes nucleophosmin 1 (NPM1), transcript variant X5, mRNA NCBI Reference Sequence: XM\_054684087.1**

GCGGGGAGCCTGCGTCCTTTCCCTGGTGTGATTCCGTCCTGCGCGGCTGTTTTCTGGAGCAGCGTTCTTT  
TATCTCCGTCCGTCTTCTCTCTACCTAAGTGCCTGCCGCCACCCGATGG**AAGAT**TCGATGGACATGGAC  
ATGAGCCCCCTGAGGCCCCAGAAGTATCTTTTTCGGTTGTGAACTAAAGGCCGACA**AAGAT**TATCACTTTA  
AGGTGGATAAT**GATGAAA**ATGAGCACCAGTTATCTTTAAGAACGGTCAGTTTAGGGGCTGGTGCAAAG**GA**  
**TGAAT**TGCACATTGTTGAAGCAGAGGCA**ATGAAT****TATGAA**GGCAGTCCAATTAAAGTAACACTGGCAACT  
TTGAAAATGTCTGTACAGCCAACGGTTTCCCTTGGGGGCTTTGAAATAACACCACCACTGGTCTTAAGGT  
TGAAGTGTGGTTTCAAGGCCAGTGCATATTAGTGGACAGCACTTAGTAGCTGTGGAGG**AAGATG**CAGAGTC  
AGA**AAGATGAA**GAGGAGGAGGATGTGAAACTCTTAAGTATATCTGGAAAGCGGTCTGCCCTGGAGGTGGT  
AGCAAGGTTCCACAGAAAAAAGTAAAACCTTGCTGCT**GATGAA****GATGATGA****CATGATGATGAA**GAG**GATG**  
**ATGATGAAGATGATGATGATGATGA**TTTT**GATGATGA**GGAAAGCTGAAGAAAAAGCGCCAGTGAAGAAAGG  
**ACAAGA**ATCC**TTCA**AAAAACAGGAAAAAACTCCTAAAACACCAAAAGGACCTAGTTCTGTAGAAGACATT

AAAGCAAAAATGCAAGCAAGTATAGAAAAAGCGCATTGAACAGTCCTGGGCACTACATGTAAATTAAGCC  
CA**AAGATG**GGGAGAAAGGAAAAGGAGAGACAAATATAGTCCATACTGAGTGTCATCAACAATCCAGACTG  
AAGTCTTCTATTTTAATCTCAATCCCCCTTTTCTGATTTGCCACCCATGCCTCTTCAGGCTGGAAACAATC  
TCTTGGTTCCCTAAAGCACTTTCTTCTGACTGCTGTG**ATTCA**GTGAACCTTGCCCTTTGCTTTCTATTAC  
TTGTGCATTTGCCTCACCTGACAATGTTTTAAATCGCCTTTGTATCTCCTTAGCTGCTCAATAAATATT**T**  
**GAATGAAT**CAA

**48** 1127 9.9 (3.15) **12.1 $\sigma$**

**Phodopus roborovskii (NPM1) genome assembly, contig: tig00001838, whole genome shotgun sequence GenBank: CALSGD010001391.1:45191572-45191735,45193134-45193213,45193609-45193728,45193919-45194012,45194333-**

**45194439,45194739-45194800,45197041-45197098,45197333-45197416,45198153-45198254,45199997-45200071,45200851-45201920**

CGCGTCCTTTCCCTGGCGTGATTCCGTCCTGCGTGTCTGTTCTTAGGAGCAGTAGGCAGTTTTCTCCGTC  
CGATTTCTTCACTCCGAAGTTCGCGCCTCCACCTCATGGAAGACTCGATGGACATGGACATGAGCCCTC  
TTAGGCCTCAGAACTATCTTTTCGGTTGTGAACTAAAAGCTGACA**AAGAT**TATCACTTTAAGGTGGATAA  
T**GATGAAAATGA**ACACCAGTTATCACTAAGAACGGTTAGCTTAGGAGCAGGGGCAA**AAGATGAAT**TACAC  
ATCGTAGAGGCAGAAGCA**ATGAACTATGA**AGGCAGTCCAATTAAAGTAACACTGGCAACTTTGAAAATGT  
CTGTACAACCAACAGTTTTCCCTTGGGGGTTTTGAAATTACACCACCCGTGGTCCTACGGTTG**AGATG**TGG  
TTCAGGGCCTGTGCACATTAGTGGACAGCACCTAGTAGCTGTGGAGG**AAGATG**CAGAGTCAG**AAGATGAA**  
**GATG**AGGAGGATGTAAACTCTTAAGTATGTCTGGCAAGCGAT**CTGCC**CCTGGAGG**TGGTA**ACAAAGTTC  
CCCAGAAAAAAGTAAAAATC**GATGAAGATG**AGGAGGAGGAG**GATGAAGATGATGAGATGATGAAGATGA**  
**TGATGATGATGA**TTTT**GATGATGA**AGAACTGAAGAAAAAGTTCCAGTGAAGAAATCTGTACGAGATACC  
CCAGCCAAAAATGCACAAAAATCAAACCAA**AATGG**AAAAGACTTAAACCATCAACAC**CAAGAT**CAAAG  
G**TCAAGAGTCC****TTCA**AAAAACAGGAAAAAACTCCTAAAACCCCAAAGGACCTAGTTCTGTAGAAGACAT  
TAAGGCAAAAATGCAAGCAAGTATAGAAAAAGGTGGTTCTCTTCCCAAAGTGAAGCCAAGTTCATTAAT  
TATGTGAAGAATTGCTTCCG**GATG**ACTGATCAGGAGGCT**ATTCAAGAT**CTCTGGCAGTGGAGGAAGTCTC  
TTTAAGAA**AATGGT**TTAAACAGTTTGAAATATTCCGTCTTACTTAATTTCTGTAAACAGTTGATATATCTG  
GCTGTCCTTTTTTATAATGCAAAGTGAGAAGCTTTCCCTACTTTGTTTGATAAATGTTGTCCAGGTT**CCATT**  
**GCCAAGAATG**TTGTCTAAATGCCTGTTTAGTT**TTCAAG**GATGGAAGTCCACCCCTTTACTTTGGTTTTAAG  
TATGTATG**GAATG**TTATGATAGGACATAGTAATAGTGGTGGTC**AGATG**TGGA**AATGGTA**GGGAGACAAAA  
ATATACATGTGAAATAAACTCAGTATTTTAATAAAGTAGCACGGTTTCTATTTGCTTATTTAACTT**CCAT**  
**TCTTT**GTCTGAAGTTAAAAATGTCAGTGCCTCCCCAGCTACCAGTTATTGTTTGTAATTTCTGATCCAAG  
TAAGACCTTATAGTCATGGATGTTTAGGGACCTGATCTAAGTTGGACATAAAACACTG**ATTCA**TCCATCCT  
GGTTTGCTGTGGTGTATTAACACATAA**TGCCA**ACAATGCATGGGAGAGTATAACTAC**TTCA**AAACAAAAAT  
TCAGTGTCTGCTTAGCATT**TTCAAT**GTACCCCGTTTAATATATTGTGGTTTTGTATTTTCTATT**ATGGT**C  
TTCTCTACAATTGTATAATACATCAATTCTATATAGTCCCCAAGTGGAGTAAGTAATCAGGGGGAGTTTT  
CCTGGGAAAG**TCAAG**TATCCTTGCATA**CATT**CTTAGCCTTTCTGTATCAAAAGTGTTCTTTTTGTAGGG  
AGTGAAGTTGTTGAGATTGTAACCTTAAGGGCTGCTTGCTTTGTTCTTACAACCTTTT**AATGG**GGAAATT  
TTATACATACAG**GTAC**ACAACGGGTATATAAAGACATTTTAAAGTTATTCCGTAAATACACA**BTGAAGAT**  
TGGATGTGTTTAACTATTGCATAAAAAACCCTTGCT**TGAAT**ATAAATTATAG**GATGA**TTAACAGTGTGCAT  
ACATTTTACGAATACA**AATGG**CAAAAGTATTTTGAGAAGTGGAGTTAATGTTTGCC

**66** 2012 17.7 (4.2) **11.5 $\sigma$**

**Sus scrofa nucleophosmin (NPM1), transcript variant X1, mRNA NCBI Reference Sequence: XM\_013990662.2**

GCGCAGGAGAGAGACTGTGCGGGGAGGGGGGCTTCCGAGCACGCGCGCGGAGGCGGGACTTGAAGAGCTC  
TCGCGAGATCGTCAGGGTGCTATATATGTGCGCAGGGAGCCCGCGTCCTTTCCCTGGTGTGATTCCGTCC  
TGCGCGGCTGTTCTCCGCAACACTAGTGGATTATCTCCGTCCGCCTTCTCTCCCACCCAAGTGCGTGCCA  
CCAACCCATGGAAGATTGCATGGATATGGACATGAGCCCCCTGAGGCCTCAGAACTATCTTTTCGGTTGT  
GAACTAAAGGCCGATA**AAGAT**TACCACTTTAAGGTGGATAAT**GATGAA**ATGAGCACCAGTTATCTTTAA  
GAACGGTCAGTTTAGGGGCTGGCGCAAAG**GATGAG**TTGCACATTGTAGAAGCAGAGGCA**ATGAATATGA**  
**AGGCAGTCCAATCAAAGTA**CACTGGCAACTTTGAAAATGTCTGTACAGCCGACGGTTTCCCTTGGGGGC  
TTTGAAATAACACCACCTGTGGTCTTACGGTTGAAGTGTGGTTCAGGGCCTGTGCATATTAGTGGACAGC  
ACTTAGTAGCTGTAGAGG**AAGATG**CAGAGTCAG**AAGATGA**GGAGGAGG**AAGATG**TGAACTTCTGAGTAT  
ATCTGGAAAGCGTTCTGCCCCGGAGGTGGTAGCAAGGTTCCACAGAAAAAGGTAAAACTTGCTGCT**GAT**



GAAGATGAAGATGATGATGAAGATGATGACGACGATGACGAAGATGACGATGATGATGACTTTGATGATG  
AGGAAGCGGAAGAAAAAGCTCCAGTAAAGAAATCAATACGGGATACTCCAGCCAAAAATGCACAGAAATC  
AAACCAGAATGGAAGAGACTCAAAACCGTCAACACCAAGATCAAAAGGTCAAGAATCCTTCAAAAAACAG  
GAAAAAACTCCTAAACACCGAAAGGACCTAGTTCTGTAGAAGACATTAAAGCAAAAAATGCAAGCAAGTA  
TAGAAAAAGGTGGTTCTCTTCCCAAAGTGGAAGCCAAGTTCATCAATTATGTGAAGAATTGTTTCCGGAT  
GACTGACCAGGAGGCTATTCAAGATCTCTGGCAGTGGAGGAAGTCTCTTTAAGAAAATAGTTTAAACAGT  
TTGTTAAAATTTTCCGTCTTATTTTCATTTATGTAACAGTTGATATCTGGCTGTCCTTTTATAATGCAGA  
GTGAGAACTTTCCCTACCGTGTCTGATAAATGTTGTCCAGGTTCCATTGC CAAGAAATGTGTTGTCCAAAA  
TGCCTGTTTAGTTTTTAAGATGGAACCTCCACCCTTTGCTTGGTTTTAAGTATGTATGGAATGTTATGAT  
AGGACATAGTAGTAGTGGTGGTCAGACAAATGGAAATGGTGGGGAGACAAAAATATACATGTGAAATAAA  
CTCAGTATTTTAATAAAGTAGCACTATTTCTTCTGTT

53 1433 12.6 (3.55) 11.4σ

*Eptesicus fuscus* nucleophosmin 1 (NPM1), transcript variant X2, mRNA NCBI Reference Sequence: XM\_054718139.1

TGCCGTCGCCATCTTGCAGGGTGGGCTGCGCAGACTTTTGGCGCCAGGCCCCGCGCGCACGAGCAAGACGT  
AGAGCCCGCGTCCTTTCCCTGGTGCGATTCCGTCTGCGCGTCTGTTCTGCAGCACAGAAGCCGTTTCATC  
TCCGCCCCGCTTCTCTCTCACCTAAGTGCCTGCTACCAACCCCATGG AAGATCTATGGACATGGACATGA  
GCCCTCTGAGGCCCCAGAACTACCTTTTCGGTTGTGAACTAAAGGCCGATAAAGATTATCACTTTAAGGT  
GGATAATGATGAAAATGAGCACCAGTTATCTTTACGAACGGTCAGTCTAGGGGCTGGAGCAAAGGATGAA  
CTGCACATTGTGCAAGCAGAGGCCATGAATTACGAAGGCAGTCCGATTAAAGTAACACTGGCAACTTTGA  
AAATGTCTGTACAGCCAACGGTTTCCCTTGGTGGCTTTGAAATAACACCACCTGTGGTCTTACGGTTGAA  
TTGTGTTTCAGGGCCTGTGCATATTAGTGGACAGCACTTAGTAGCTGTGGAGGAAGATGCAGAGTCAGAA  
GATGACGAAGAGGAGGATGTGAAACTCCTAAGTATGTCTGGAAAGCGGTCAGCCCCCTGGAGGTGGTAGCA  
AGGTCCCGCAGAAAAAGGTAAAACCTTGCTGATGAAGATGATGAGGATGACGATGAAAGGATGATGATGA  
TGAAGATGATGATGATGATGATGATGATGATGATGATGATGATGATGATGATGATGATGATGATGATGAT  
CGAGATACTCCAGCCAAAAATGCACAAAAATCAAATCAA AATGGAAGAAAGACTCAAAACCATCAACACCAA  
GATCAAAAGGTCAAGAATCGTTCAAAAAACAGGAAAAAACTCCTAAACACCGAAAGGACCTAGTTCTGT  
AGAAGACATTAAAGCAAAAAATGCAAGCAAGTATAGAAAAGGCGCATTGAACAATCTGGGCAC TACTGGT  
AAATTAAGCCCAAGATGGGGAAAGAGGAAAAGGAGAGACAAATATAGTCCA TACTGAGTATCATCAACA  
ATCCAGACTGAAGTCTTCTATTTTAATCTCAATGCCCTTTCTGTTTATCACTCACCCATGCCCCCTTC  
CAGGCTGGAAGCAATCTCACTTAGTCTCCTAATGAACCTTTCTTTTGCTGTGATTCACTGAACTTTTCTT  
GACTTGTTTCATTATTCTCGCCTCTTTGACCATGTTTTAAACACCTTTGTATCTCCCTAGCTGCTCAATAA  
ATATT TGAATGAA

51 1269 11.8 (3.4) 11.4σ

*Agelaius phoeniceus* nucleophosmin 1 (NPM1), transcript variant X3, mRNA NCBI Reference Sequence: XM\_054642943.1

GTGCGCGTCCGCCCGCAGCGCAGGAGCTTCACTCAGTCGTGCCCCAGCCCCGCGATGGAGGACAGCGCCA  
TGGACATGGAGAGCATGGGCCCCACTGCGCCCCGAGACTTTCTCTTCGGCTGCGAGCTTAAAGCGGATAA  
AGAGTTTCAGTTTAAAGTAGATGATGAAGAAAATGAACATCAGTTGTCTCTGAGAACGGTTACTTTAGGA  
GCTGGAGCCA AAGATGAATTACACATTGTAGAAGCAGAAGCACTGGACTATGAAGGCAACCCACTAAAG  
TAGTATTGGCATCTCTGAAAATGTCAGTGCAGCCTACAGTTTCTTGGGTGGCTTCGAGATCACACCACC  
AGTGGTGTGAGGTTGAAATGTGGTTCAGGGCCTGTTTACGTCAGTGGTCAGCACCTCGTAGCATTAGAA  
GAAGAACCAGAATCAGATGAGGAGGAAGATGATGCAAAAATTGTTAATGCTTCAACAAAGAGACCAGCAA  
GTGGAGGAGGAGCTAAACACCACAGAAAAAACCAAAATTAGCAG AAGATGATGAGGATGACGATGAAGA  
TGAGGATGACGATGATGATGATGAGGATGACTTAGAGGATGATGAGGAAGAAATTAAAGCACCAATAAAG  
AAACCTGTTTCGTGAGGTTGCAGGAAAAAATATGCAGAAAGCAAAGCA GAATGGAA AAGATCTAA GCCAT  
CCACACCAGCATCTAAATCAAAA GGTACTACCTTCCTAAGCTGGAGCCCCAAATTGCCCACTACGTTAA  
GAATTGCTTCAGGACAGAGGACCAGAAGGT CATTCAAGCTCTCTGGCAGTGGAGACAGACTCTGTAAGAA  
AAGAAAACAGTTTAAACAGTTTCGTTAAAATCTGCAATCTTACTTCTGTAA CCATTATTTGGCTGTTCTTT  
TTACAAA TACTGAAAGAGCTTTTCTCTGTGTCTGATAAATGTCATCCAGATT

41 960 8.44 (2.9) 11.2σ

**Table S4.** Maxwell™ classification clusters.

| Name gene or RNA                                                                | Distance to barycenter | % distance total | AL-prox | Mean AL-prox |
|---------------------------------------------------------------------------------|------------------------|------------------|---------|--------------|
| <i>Lynx rufus</i> nucleolin                                                     | 0                      |                  | 13,9    | 14,66        |
| <i>Suncus etruscus</i> nucleolin                                                | 623310                 | 24,2%            | 14,8    |              |
| <i>Rhinolophus ferrumequinum</i> nucleolin                                      | 445316                 | 17,3%            | 16,4    |              |
| <i>Elephas maximus indicus</i> nucleolin                                        | 569205                 | 22,1%            | 14,2    |              |
| <i>Sciurus carolinensis</i> nucleolin                                           | 496040                 | 19,2%            | 16,3    |              |
| <i>Equus quagga</i> nucleolin                                                   | 392613                 | 15,2%            | 13      |              |
| <i>Prionailurus viverrinus</i> nucleolin                                        | 53318                  | 2%               | 14      |              |
| <i>Halorhabdus utahensis</i> DSM 12940 strain DSM 12940 5S ribosomal RNA        | 0                      |                  | 1,7     | 1,28         |
| <i>Halovivax ruber</i> XH-70 strain XH-70 5S ribosomal RNA                      | 571428                 | 19%              | 1,24    |              |
| <i>Nitrosopumilus maritimus</i> 5S                                              | 742857                 | 24,6%            | 0,32    |              |
| <i>Sulfolobus solfataricus</i> P2 strain 5S                                     | 734693                 | 24,4%            | 0       |              |
| <i>Halomicrobium mukohataei</i> DSM 12286 5S                                    | 571428                 | 19%              | 2,8     |              |
| <i>Halorubrum lacus profundus</i> ATCC 49239 strain ATCC 49239 5S ribosomal RNA | 393939                 | 13%              | 1,63    |              |
| <i>Methanobrevibacter psychrophilus</i> R15 strain 5S                           | 0                      |                  | 2,8     | 4,95         |
| <i>Hydrobacter penzbergensis</i> nucleolin                                      | 981132                 | 33,5%            | 10,6    |              |
| <i>Ogataea polymorpha</i> strain nucleolin                                      | 969924                 | 33,1%            | 3,6     |              |
| <i>Stackebrandtia nassauensis</i> DSM 44728 nucleolin                           | 977086                 | 33,4%            | 2,8     |              |
| <i>Archaeoglobus veneficus</i> SNP6 strain SNP6 5S ribosomal RNA                | 0                      |                  | 0,9     | 1,32         |
| <i>Hyperthermus butylicus</i> DSM 5456 strain DSM 5456 5S                       | 670103                 | 31,6%            | 0       |              |
| <i>Ferroglobus placidus</i> DSM 10642 strain DSM 10642 5S ribosomal RNA         | 371134                 | 17,5%            | 1,54    |              |
| <i>Candidatus Korarchaeum cryptofilum</i> 5S                                    | 587628                 | 27,7%            | 1,7     |              |
| <i>Archaeoglobus sulfaticallidus</i> PM70-1 strain PM70 5S-1                    | 190000                 | 9%               | 1,6     |              |
| <i>Archaeoglobus profundus</i> DSM 5631 strain DSM 5631 5S ribosomal RNA        | 300000                 | 14,2%            | 2,2     |              |
| <i>Danio rerio</i> nucleolin                                                    | 0                      |                  | 8,6     | 6,85         |
| <i>Cyprinus carpio</i> nucleolin gene complete cds                              | 932679                 | 20,9%            | 5,6     |              |
| <i>Oncorhynchus mykiss</i> nucleolin mRNA                                       | 958001                 | 21,6%            | 2       |              |
| <i>Xyrauchen texanus</i> nucleolin                                              | 797979                 | 17,9%            | 7       |              |
| <i>Pangasionodon hypophthalmus</i> nucleolin                                    | 872939                 | 19,6%            | 7,1     |              |
| <i>Astyanax mexicanus</i> nucleolin                                             | 890483                 | 20%              | 10,8    |              |
| <i>Methanohalophilus mahii</i> DSM 5219 strain 5S                               | 0                      |                  | 2,2     | 2,75         |

|                                                                             |        |       |      |      |
|-----------------------------------------------------------------------------|--------|-------|------|------|
| <i>Methanolobium evestigatum</i> Z-7303 strain Z-7303 5S ribosomal RNA      | 462264 | 21,1% | 2,2  |      |
| <i>Methanosarcina mazei</i> 5S ribosomal RNA gene                           | 389380 | 17,8% | 2,6  |      |
| <i>Methanosarcina barkeri</i> 5S                                            | 449541 | 20,5% | 2,6  |      |
| <i>Methanosalsum zhilinae</i> DSM 4017 strain DSM 4017 5S                   | 432692 | 19,7% | 5,3  |      |
| <i>Methanomethylovorans hollandica</i> DSM 15978 strain DSM 15978 5S        | 457142 | 20,9% | 1,6  |      |
| <i>Echinococcus granulosus</i> isalte nucleolin                             | 0      |       | 1,5  | 6,72 |
| <i>Anopheles funestus</i> nucleolin                                         | 968060 | 25%   | 3,74 |      |
| <i>Bactrocera dorsalis</i> nucleolin                                        | 966539 | 25%   | 9,13 |      |
| <i>Zea mays</i> nucleolin                                                   | 960456 | 24,8% | 10,6 |      |
| <i>Microplitis demolitor</i> nucleolin                                      | 973384 | 25,2% | 8,62 |      |
| <i>Lates calcarifer</i> nucleolin                                           | 0      |       | 8,8  | 7,4  |
| <i>Anopheles nili</i> nucleolin                                             | 978413 | 27,4% | 4,1  |      |
| <i>Lethenteron camtschaticum</i> nucleolin mRNA                             | 965361 | 27%   | 6,8  |      |
| <i>Bombina bombina</i> nucleolin                                            | 974451 | 27,3% | 6,2  |      |
| <i>Acanthochromis polyacanthus</i> nucleolin                                | 651674 | 18,3% | 11,1 |      |
| <i>Thermosphaera aggregans</i> DSM 11486 strain DSM 11486 5S ribosomal RNA  | 0      |       | 0,2  | 0,04 |
| <i>Ignicoccus hospitalis</i> 5S                                             | 653061 | 27,8% | 0    |      |
| <i>Sulfolobus islandicus</i> M,14,25 strain M,14,25 5S ribosomal RNA        | 607142 | 25,9% | 0    |      |
| <i>Pyrolobus fumarii</i> 1A strain 5S                                       | 494117 | 21%   | 0    |      |
| <i>Acidilobus saccharovorans</i> 345-15 strain 345-15 5S ribosomal RNA      | 593406 | 25,3% | 0    |      |
| <i>Vulcanisaeta distributa</i> DSM 14429 strain DSM 5S                      | 0      |       | 1,65 | 1,13 |
| <i>Candidatus Nitrososphaera gargensis</i> Ga9,2 5S                         | 683673 | 32,4% | 1    |      |
| <i>Vulcanisaeta moutnovskia</i> 768-28 strain 768-28 5S                     | 284313 | 13,5% | 1,6  |      |
| <i>Thermoproteus uzoniensis</i> 5S                                          | 550000 | 26%   | 0,3  |      |
| <i>Pyrobaculum neutrophilum</i> V24Sta strain 5S                            | 593750 | 28,1% | 1,1  |      |
| <i>Harpia harpyja</i> nucleolin                                             | 0      |       | 14,3 | 14,4 |
| <i>Serinus canaria</i> nucleolin                                            | 517621 | 25,1% | 14,2 |      |
| <i>Manacus candei</i> nucleolin                                             | 506172 | 24,5% | 12,6 |      |
| <i>Gallus gallus</i> nucleolin                                              | 566629 | 27,4% | 19,8 |      |
| <i>Cygnus atratus</i> nucleolin                                             | 474118 | 23%   | 11,1 |      |
| <i>Orcinus orca</i> nucleolin                                               | 0      |       | 12,3 | 15,5 |
| <i>Phacochoerus africanus</i> nucleolin                                     | 453142 | 26,6% | 11,6 |      |
| <i>Camelus dromedarius</i> breed African isolate Drom800 chrom, 5 nucleolin | 424190 | 24,9% | 14,5 |      |
| <i>Budorcas taxicolor</i> nucleolin                                         | 416050 | 24,3% | 19,6 |      |
| <i>Bos taurus</i> nucleolin                                                 | 412946 | 24,2% | 19,6 |      |

|                                                                               |        |       |      |       |
|-------------------------------------------------------------------------------|--------|-------|------|-------|
| <i>Thermococcus onnurineus</i> NA1 strain NA1 5S ribosomal RNA                | 0      |       | 1,5  | 1,42  |
| <i>Thermococcus sibiricus</i> MM 739 strain MM 739 5S                         | 190476 | 25,4% | 1,5  |       |
| <i>Thermococcus nautili</i> 5S                                                | 209523 | 28%   | 1,5  |       |
| <i>Thermococcus litoralis</i> 5S                                              | 120370 | 16,1% | 1,1  |       |
| <i>Thermococcus gammatolerans</i> EJ3 strain 5S                               | 228571 | 30,5% | 1,5  |       |
| <i>Salinarchaeum</i> sp, Harcht-Bsk1 strain Harcht-Bsk1 5S ribosomal RNA      | 0      |       | 1,1  | 0,6   |
| <i>Caldvirga maquilensis</i> IC-167 strain IC-167 5S                          | 839743 | 39,6% | 1    |       |
| <i>Methanobacterium</i> sp, AL-21 strain AL-21 5S                             | 824074 | 38,9% | 0,3  |       |
| <i>Haloterrigena turkmenica</i> DSM 5511 strain DSM 5S                        | 455445 | 21,5% | 0    |       |
| <i>Natronomonas moolapensis</i> 8,8,11 strain 8,8,11 5S                       | 0      |       | 0,35 | 0,725 |
| <i>Halalkalicoccus jeotgali</i> B3 strain B3 5S ribosomal RNA 5S              | 352380 | 50,7% | 2,25 |       |
| <i>Natronomonas pharaonis</i> DSM 2160 strain DSM 2160 5S                     | 95238  | 13,7% | 0    |       |
| <i>Haloarcula hispanica</i> ATCC 33960 strain CGMCC 1,2049 5S ribosomal RNA   | 247619 | 35,6% | 0,3  |       |
| <i>Rhipicephalus sanguineus</i> nucleolin                                     | 0      |       | 14,8 | 7,4   |
| <i>Halopiger xanaduensis</i> SH-6 strain SH-6 5S                              | 978615 | 33,3% | 1,1  |       |
| <i>Drosophila albomicans</i> nucleolin                                        | 980651 | 33,3% | 6,7  |       |
| <i>Octopus bimaculoides</i> nucleolin                                         | 982199 | 33,4% | 6,9  |       |
| <i>Methanoregula formica</i> SMSP 5S ribosomal RNA                            | 0      |       | 1,5  | 1,1   |
| <i>Ferropasma acidarmanus</i> fer1 strain fer1 5S                             | 769230 | 35,9% | 0,3  |       |
| <i>Methanosphaerula palustris</i> E1-9c strain E1-9c 5S ribosomal RNA         | 685714 | 32%   | 2,3  |       |
| <i>Aciduliprofundum boonei</i> T469 strain T469 5S ribosomal RNA              | 686274 | 32,1% | 0,3  |       |
| <i>Desulfurococcus fermentans</i> DSM 16532 strain DSM 16532 5S ribosomal RNA | 0      |       | 0    | 0     |
| <i>Desulfurococcus kamchatkensis</i> 1221n strain 1221n 5S ribosomal RNA      | 127450 | 22,3% | 0    |       |
| <i>Staphylothermus hellenicus</i> DSM 12710 strain DSM 12710                  | 212765 | 37,2% | 0    |       |
| <i>Desulfurococcus mucosus</i> DSM 2162 strain DSM 2162 5S ribosomal RNA      | 231578 | 40,5% | 0    |       |
| <i>Acinonyx jubatus</i> nucleolar protein 11 (NOL11) variant X1               | 0      |       | 1,14 | 1,53  |
| <i>Panthera pardus</i> nucleolar protein 11 (NOL11) variant X1                | 100112 | 61,2% | 2,9  |       |
| <i>Acinonyx jubatus</i> nucleolar protein 11 (NOL11) variant X2               | 63399  | 38,8% | 0,54 |       |
| <i>Phacochoerus africanus</i> nucleolar protein 11 (NOL11)                    | 0      |       | 2,8  | 4,27  |
| <i>Rhinolophus ferrumequinum</i> protein 11 (NOL11)                           | 614669 | 45,9% | 6,6  |       |
| <i>Prionailurus viverrinus</i> nucleolar protein 11 (NOL11)                   | 725088 | 54,1% | 3,4  |       |
| <i>Podarcis raffonei</i> nucleolin                                            | 0      |       | 5,7  | 8,2   |
| <i>Gopherus flavomarginatus</i> nucleolin                                     | 800942 | 47,8% | 6,8  |       |
| <i>Ornithorhynchus anatinus</i> nucleolin                                     | 876195 | 52,2% | 12   |       |
| <i>Ignisphaera aggregans</i> 5S                                               | 0      |       | 1    | 0,97  |

|                                                                       |        |       |      |      |
|-----------------------------------------------------------------------|--------|-------|------|------|
| <i>Caldisphaera lagunensis</i> DSM 15908 strain DSM 15908 5S          | 705263 | 53,6% | 1,6  |      |
| <i>Fervidococcus fontis</i> Kam940 strain Kam940 5S ribosomal RNA     | 610526 | 46,4% | 0,3  |      |
| <i>Rattus norvegicus</i> nucleolin gene                               | 0      |       | 18,8 | 11,6 |
| <i>Mus musculus</i> nucleolin gene                                    | 703507 | 44,2% | 8,3  |      |
| <i>Peromyscus californicus insignis</i> nucleolin                     | 888888 | 55,8% | 7,7  |      |
| <i>Pyrococcus yayanosii</i> CH1 strain 5S                             | 0      |       | 1,5  | 1,17 |
| <i>Methanoplanus petrolearius</i> 5S ribosomal RNA                    | 582524 | 49,3% | 0,3  |      |
| <i>Methanothermus fervidus</i> DSM 2088 5S                            | 598039 | 50,7% | 1,7  |      |
| <i>Dicentrarchus labrax</i> nucleolin                                 | 0      |       | 5,5  | 6,5  |
| <i>Epinephelus moara</i> nucleolin                                    | 553706 | 49,7% | 7,3  |      |
| <i>Epinephelus fuscoguttatus</i> nucleolin                            | 561465 | 50,3% | 6,7  |      |
| <i>Microtus fortis</i> nucleolin                                      | 0      |       | 15,7 | 13,6 |
| <i>Phodopus roborovskii</i> nucleolin                                 | 538420 | 46,2% | 12,1 |      |
| <i>Apodemus sylvaticus</i> nucleolin                                  | 627619 | 53,8% | 13   |      |
| <i>Methanosaeta concilii</i> GP6 strain GP6 5S ribosomal RNA          | 0      |       | 2,3  | 3,3  |
| <i>Methanosaeta thermophila</i> strain 5S                             | 406250 | 51%   | 2,3  |      |
| <i>Methanosaeta harundinacea</i> 6Ac 5S                               | 390000 | 49%   | 5,3  |      |
| <i>Methanocaldococcus fervens</i> AG86 strain AG86 5S ribosomal RNA   | 0      |       | 2,4  | 2,3  |
| <i>Methanocaldococcus vulcanius</i> M7 strain M7 5S ribosomal RNA     | 108695 | 48,7% | 1,1  |      |
| <i>Methanocaldococcus jannaschii</i> DSM 2661 strain DSM 2661 5S      | 114583 | 51,3% | 3,5  |      |
| <i>Hemicordylus capensis</i> nucleolar variant x1 (NOL11)             | 0      |       | 5,4  | 5,6  |
| <i>Hemicordylus capensis</i> variant x2 nucleolar (NOL11)             | 94681  | 51,1% | 4,9  |      |
| <i>Hemicordylus capensis</i> nucleolar (NOL11) x3                     | 90590  | 48,9% | 6,6  |      |
| <i>Cygnus atratus</i> nucleolar protein (NOL11)                       | 0      |       | 6,7  | 5,97 |
| <i>Harpia harpyja</i> nucleolar protein 11 (NOL11) variant X1         | 556082 | 47,5% | 5,9  |      |
| <i>Harpia harpyja</i> nucleolar protein (NOL11) variant X2            | 614007 | 52,5% | 5,3  |      |
| <i>Acidianus hospitalis</i> W1 5S                                     | 0      |       | 0    | 0    |
| <i>Aeropyrum camini</i> SY1 = JCM 12091 5S                            | 500000 | 50,5% | 0    |      |
| <i>Aeropyrum pernix</i> K1 strain K1 (= NBRC 100138) 5S ribosomal RNA | 488636 | 49,5% | 0    |      |
| <i>Pyrobaculum arsenaticum</i> DSM 13514 5S                           | 0      |       | 0,4  | 0,3  |
| <i>Pyrobaculum oguniense</i> TE7 5S                                   | 31250  | 12,2% | 0,3  |      |
| <i>Pyrobaculum aerophilum</i> str, IM2 strain 5S                      | 224489 | 87,8% | 0,2  |      |
| <i>Gulo gulo luscus</i> isolate (NOL11)                               | 0      |       | 4,9  | 3,55 |
| <i>Lutra lutra</i> nucleolar protein 11 (NOL11) variant X2            | 297282 | 100%  | 2,2  |      |
| <i>Halostagnicola larsenii</i> strain XH-48 5S ribosoma               | 0      |       | 1,1  | 1,4  |

|                                                                         |        |      |      |      |
|-------------------------------------------------------------------------|--------|------|------|------|
| <i>Natrialba magadii</i> ATCC 43099 strain ATCC 43099 5S ribosomal RNA  | 307692 | 100% | 1,7  |      |
| <i>Halobacterium salinarum</i> R1 strain DSM 671 = R1 5S                | 0      |      | 1    | 0,95 |
| <i>Halobacterium</i> sp, NRC-1 strain NRC-1 5S                          | 47619  | 100% | 0,9  |      |
| <i>Natronococcus occultus</i> SP4 strain SP4 5S ribosomal RNA           | 0      |      | 0,32 | 0,66 |
| <i>Natrinema pellirubrum</i> DSM 15624 strain DSM 15624 5S ribosomal RN | 91743  | 100% | 1    |      |
| <i>Methanocaldococcus infernus</i> ME strain ME 5S ribosomal RNA        | 0      |      | 3    | 2,05 |
| <i>Methanotorris igneus</i> Kol 5 strain Kol 5 5S ribosomal             | 387096 | 100% | 1,1  |      |
| <i>Peromyscus californicus insignis</i> nucleolar (NOL11)               | 0      |      | 6,4  | 4,75 |
| <i>Rattus norvegicus</i> nucleolar protein 11 (NOL11) x2                | 619990 | 100% | 3,1  |      |
| <i>Methanococcus voltae</i> A3 strain A3 5S                             | 0      |      | 7    | 5    |
| <i>Methanococcus maripaludis</i> S2 strain 5S                           | 323529 | 100% | 3    |      |
| <i>Cricetulus griseus</i> C23 nucleolin glycine rich region             | 0      |      | 2,7  | 7,3  |
| <i>Homo sapiens</i> nucleolin gene                                      | 980160 | 100% | 11,9 |      |
| <i>Metallosphaera cuprina</i> Ar-4 strain Ar-4 5S ribosomal             | 0      |      | 0    | 1,4  |
| <i>Methanothermobacter marburgensis</i> str 5S                          | 836956 | 100% | 2,8  |      |
| <i>Methanothermococcus okinawensis</i> IH1 strain IH1 5S ribosomal RNA  | 0      |      | 1,8  | 1,05 |
| <i>Ornithorhynchus anatinus</i> isolate Pmale09 chromosome 1 5S         | 806451 | 100% | 0,3  |      |
| <i>Haloquadratum walsbyi</i> DSM 16790 5S                               | 0      |      | 0    | 0    |
| <i>Halogeometricum borinquense</i> 5S                                   | 628571 | 100% | 0    |      |
| <i>Thermofilum pendens</i> 5S ribosomal RNA                             | 0      |      | 0    | 0,5  |
| <i>Caldvirga maquilensis</i> IC-167 strain IC-167 5S                    | 696969 | 100% | 1    |      |
| <i>Hippocampus zosterae</i> nucleolar protein NOL11                     | 0      |      | 1,9  | 5,2  |
| <i>Podarcis raffonei</i> nucleolar x1 NOL11                             | 955613 | 100% | 6,6  |      |
| <i>Nanoarchaeum equitans</i> Kin4-M 5S                                  | 0      |      | 2,9  | 2,85 |
| <i>Nanoarchaeum equitans</i> Kin4-M 5S ribosomal RNA                    | 97087  | 100% | 2,8  |      |
| <i>Haloflex mediterranei</i> ATCC 33500 strain CGMCC 5S                 | 0      |      | 0    | 0    |
| <i>Haloflex volcanii</i> DS2 strain DS2 5S ribosomal RNA                | 74766  | 100% | 0    |      |
| <i>Xenopus laevis</i> mRNA for nucleolin                                | 0      |      | 13   | 13   |
| <i>Acinonyx jubatus</i> nucleolar protein 11 (NOL11)                    | 0      |      | 0,5  | 0,5  |
| <i>Anopheles moucheti</i> nucleolin                                     | 0      |      | 3,7  | 3,7  |
| <i>Exophiala</i> sp nucleolin                                           | 0      |      | 9,5  | 9,5  |
| <i>Bauhinia variegata</i> isolate chromosome 1 nucleolin                | 0      |      | 14,9 | 14,9 |
| <i>Lactobacillus lindneri</i> DSM 20690 nucleolin                       | 0      |      | 11,7 | 11,7 |
| <i>Pristis pectinata</i> nucleolar NOL11                                | 0      |      | 3,2  | 3,2  |
| <i>Syngnathus scovelli</i> nucleolin                                    | 0      |      | 3,6  | 3,6  |
